# Supplementary material for: An alternative splicing switch in FLNB promotes the mesenchymal cell state in human breast cancer
Source: eLife. 2018 Jul 30;7:e37184. doi: 10.7554/eLife.37184 (PMC6103745; doi:10.7554/eLife.37184)
Supplement: Figure 4—source data 2. [file elife-37184-fig4-data2.xlsx]

## Sheet: QKI CLIP (p-value<0.01)
Supplementary Table S5 - CLIP peaks called by CLIPper and normalized to size-matched input
QKI CLIP peaks with p-value<0.01
Chromosome	Start	End	-log10(p-value)	log2(fold-change)	Strand
chr1	565646	565742	2.72544	1.01371	+
chr1	569884	569958	9.87434	2.75023	+
chr1	973330	973363	2.18977	3.01761	+
chr1	974587	974673	5.23109	1.47508	+
chr1	975839	975900	3.28737	4.21971	+
chr1	978283	978340	3.19105	4.24001	+
chr1	982544	982631	15.6576	6.1633	+
chr1	988543	988642	11.8501	4.85691	+
chr1	988655	988738	10.1026	4.2863	+
chr1	988784	988839	7.59591	2.48232	+
chr1	988907	988934	2.06384	2.25189	+
chr1	988944	988999	11.3562	3.81116	+
chr1	990422	990507	3.89848	3.63475	+
chr1	990600	990686	2.19417	2.34227	+
chr1	991366	991476	7.46334	3.14799	+
chr1	1043427	1043641	9.25082	4.52689	-
chr1	1043821	1043863	6.39233	3.52012	-
chr1	1043916	1043987	5.07293	2.89653	-
chr1	1044194	1044263	4.5578	3.13475	-
chr1	1047867	1047970	3.71019	4.43265	-
chr1	1154586	1154764	2.26175	3.34227	-
chr1	1274309	1274395	15.5711	5.50997	-
chr1	1275232	1275337	8.20447	4.60258	-
chr1	1277600	1277631	2.17334	3.75458	-
chr1	1686936	1687003	4.53269	3.43265	-
chr1	1687252	1687323	3.61457	3.60258	-
chr1	1717436	1717491	5.21934	2.44309	-
chr1	1733302	1733380	3.27894	4.07199	-
chr1	1807885	1808027	25.2889	3.67591	-
chr1	1814750	1814791	2.67819	4.01761	-
chr1	1822025	1822100	3.00025	1.59312	-
chr1	2078567	2078624	3.28988	3.42181	+
chr1	2078760	2078904	7.29482	3.91485	+
chr1	2079014	2079051	3.28988	3.42181	+
chr1	2114824	2114949	4.01415	4.03843	-
chr1	2201210	2201272	2.17334	3.75458	+
chr1	2239997	2240036	2.67819	4.01761	+
chr1	2241406	2241545	6.25424	3.10405	+
chr1	2363769	2363841	2.40671	3.05924	+
chr1	2371888	2371937	10.3179	4.89208	+
chr1	2372000	2372182	21.0118	3.98234	+
chr1	2372278	2372300	8.73002	4.68058	+
chr1	2382021	2382093	3.89654	4.42181	+
chr1	2390709	2390810	3.19105	4.24001	+
chr1	2392467	2392512	3.41117	4.25189	+
chr1	2393461	2393554	5.59294	3.83091	+
chr1	2393748	2393837	5.0862	4.8017	+
chr1	2393849	2393936	6.56416	4.25189	+
chr1	2403861	2403910	2.17334	3.75458	+
chr1	2434374	2434448	14.2028	4.97566	+
chr1	2434471	2434531	6.78037	3.80369	+
chr1	2434542	2434577	7.98716	5.43265	+
chr1	2434602	2434745	15.6576	5.31059	+
chr1	3639317	3639481	3.47634	4.0219	+
chr1	3639561	3639641	3.58248	4.33091	+
chr1	6284620	6284670	3.61457	3.60258	-
chr1	6342663	6342762	6.56488	5.0512	-
chr1	6368135	6368182	2.65443	3.24001	-
chr1	6416405	6416519	2.38861	1.84227	-
chr1	6430474	6430550	2.49718	3.29572	-
chr1	6885529	6885604	3.19105	4.24001	+
chr1	8076550	8076668	10.3926	3.52105	-
chr1	8082760	8083051	9.87935	4.89017	-
chr1	8083760	8083799	2.90318	1.71578	-
chr1	8084092	8084309	14.446	5.9382	-
chr1	8084419	8084445	6.36411	3.75439	-
chr1	8084476	8084535	10.7944	4.40691	-
chr1	8084578	8084650	4.73004	1.77352	-
chr1	8085586	8085605	3.41117	4.25189	-
chr1	8086015	8086215	6.68037	2.46368	-
chr1	8639073	8639179	2.55549	3.53843	-
chr1	8710047	8710175	2.54863	3.71971	-
chr1	8778090	8778122	3.41117	4.25189	-
chr1	8778369	8778437	2.75455	3.07199	-
chr1	8809639	8809689	3.04468	4.13475	-
chr1	8824831	8824941	4.86222	4.17848	-
chr1	8921118	8921218	5.17545	3.24916	-
chr1	8928247	8928288	2.18977	3.01761	-
chr1	8930640	8930845	7.64055	3.80618	-
chr1	8930966	8931041	6.65692	3.84227	-
chr1	8932017	8932054	3.19105	4.24001	-
chr1	8934882	8934900	2.67819	4.01761	-
chr1	9174621	9174644	3.78839	4.40691	-
chr1	9667388	9667575	3.736	3.76433	+
chr1	9789121	9789189	3.18692	3.00323	-
chr1	9789214	9789287	4.1064	3.75458	-
chr1	9789401	9789438	4.1064	3.75458	-
chr1	9789887	9789962	4.9108	3.15878	-
chr1	9790025	9790031	3.61457	3.60258	-
chr1	9790058	9790145	21.1032	2.61185	-
chr1	9790370	9790449	7.16296	2.89653	-
chr1	9796173	9796270	10.8111	4.81791	-
chr1	9797222	9797348	2.95364	3.12459	-
chr1	9797396	9797480	5.62178	4.92221	-
chr1	9815394	9815455	2.34132	2.34227	-
chr1	9815583	9815650	2.78799	3.92723	-
chr1	9816443	9816545	4.77587	4.5882	-
chr1	9883722	9883837	2.09472	1.21075	-
chr1	9883929	9883991	2.68403	2.84769	-
chr1	9953401	9953460	3.71019	4.43265	-
chr1	10015966	10016082	2.84406	3.25189	+
chr1	10166667	10166717	5.64493	4.90691	+
chr1	10166749	10166792	4.54203	4.63475	+
chr1	10166860	10166923	10.4232	5.71132	+
chr1	10167154	10167204	6.90413	5.24001	+
chr1	10167286	10167329	3.89654	4.42181	+
chr1	10167437	10167551	13.254	5.16869	+
chr1	10168144	10168246	4.59525	4.65695	+
chr1	10169040	10169108	4.97768	3.462	+
chr1	10215377	10215445	2.068	3.63475	+
chr1	10339228	10339337	4.9529	4.424	+
chr1	10340817	10340954	9.55306	5.62339	+
chr1	10340986	10341138	4.91152	4.6379	+
chr1	10342311	10342379	4.10495	3.45668	+
chr1	10348807	10348880	2.10648	3.63475	+
chr1	10357669	10357759	2.54863	3.71971	+
chr1	10357807	10357939	4.79106	4.69249	+
chr1	10362574	10362856	6.78779	4.11534	+
chr1	10372747	10372797	2.45655	3.83685	+
chr1	10599912	10599993	2.09842	2.13475	+
chr1	10786119	10786202	2.85016	4.00323	-
chr1	11083722	11083775	2.18977	3.01761	+
chr1	11083903	11083942	2.17334	3.75458	+
chr1	12636777	12636840	3.41117	4.25189	-
chr1	12655866	12655928	2.41072	2.66693	-
chr1	14077443	14077560	6.17811	4.72812	+
chr1	14091509	14091643	3.53633	3.98497	+
chr1	15504341	15504424	2.08512	2.92723	+
chr1	15755477	15755631	3.77076	2.51121	+
chr1	15756113	15756177	3.6095	4.29572	+
chr1	15883461	15883520	3.04468	4.13475	+
chr1	15883823	15883871	2.45655	3.83685	+
chr1	15984342	15984406	2.45655	3.83685	+
chr1	16011002	16011040	7.77993	1.71799	+
chr1	16049323	16049412	5.13083	4.77745	+
chr1	16049455	16049605	4.38574	4.57382	+
chr1	16051066	16051112	2.9307	4.05924	+
chr1	16200937	16201033	8.03583	3.41102	+
chr1	16201127	16201230	3.18981	2.61443	+
chr1	16202644	16202740	2.9307	4.05924	+
chr1	16221774	16221872	3.06087	4.14963	+
chr1	16236868	16236915	2.068	3.63475	+
chr1	16237223	16237298	2.45655	3.83685	+
chr1	16473795	16473857	2.18977	3.01761	-
chr1	16776535	16776600	2.36291	3.74595	+
chr1	16917067	16917138	5.54362	4.84227	-
chr1	16946819	16946897	3.3999	3.27951	-
chr1	16947012	16947073	4.13708	2.75006	-
chr1	16949904	16949949	2.06572	3.53843	-
chr1	17199077	17199152	5.74944	4.54331	+
chr1	17251534	17251617	4.05834	3.30712	+
chr1	19231942	19232010	2.39979	1.52576	-
chr1	19243637	19243739	4.38668	3.79572	-
chr1	19243909	19244009	3.62624	2.87172	-
chr1	19495101	19495167	2.9307	4.05924	-
chr1	19667702	19667820	4.21945	4.24595	-
chr1	19667938	19668026	3.16035	4.14276	-
chr1	19668644	19668689	2.9307	4.05924	-
chr1	19668875	19668917	2.67819	4.01761	-
chr1	19777433	19777527	3.89654	4.42181	-
chr1	19784112	19784172	2.17334	3.75458	-
chr1	19971120	19971185	2.17334	3.75458	+
chr1	20809414	20809474	2.24263	1.67366	-
chr1	20812090	20812118	3.71019	4.43265	-
chr1	20978686	20978819	2.46485	2.1132	-
chr1	21107271	21107375	3.43652	3.50323	-
chr1	21195355	21195400	2.45655	3.83685	-
chr1	21195440	21195492	3.03494	4.0882	-
chr1	21217688	21217756	2.9307	4.05924	-
chr1	21247746	21247806	2.45655	3.83685	-
chr1	21323616	21323683	6.56488	5.0512	-
chr1	21323704	21323769	3.13657	3.42723	-
chr1	21323999	21324058	7.88207	5.33935	-
chr1	21326406	21326448	2.17334	3.75458	-
chr1	21328454	21328544	4.20239	3.71132	-
chr1	21354536	21354630	3.28988	3.42181	-
chr1	21356129	21356260	5.10581	4.53635	-
chr1	21403850	21403898	2.45655	3.83685	-
chr1	21404935	21404991	3.41117	4.25189	-
chr1	21457216	21457300	2.54863	3.71971	-
chr1	21480535	21480594	3.03259	4.00323	-
chr1	21498019	21498077	4.13293	3.69249	-
chr1	22054136	22054208	8.36033	5.32516	-
chr1	22054278	22054332	4.48291	2.74595	-
chr1	22054561	22054709	7.81823	4.63569	-
chr1	22054759	22054834	5.64574	3.13475	-
chr1	22054918	22054976	10.9741	5.72305	-
chr1	22210940	22211000	3.19105	4.24001	-
chr1	22382807	22382865	7.37706	5.25189	+
chr1	22382948	22383007	6.36847	5.09617	+
chr1	22383099	22383156	4.5476	3.36737	+
chr1	22415880	22415937	10.0814	5.69595	+
chr1	22416096	22416166	15.6576	6.89653	+
chr1	22416339	22416351	3.24124	2.98885	+
chr1	22416382	22416442	10.2292	5.69249	+
chr1	22416546	22416587	3.64092	2.83685	+
chr1	22416957	22417006	3.13259	3.01761	+
chr1	22417038	22417098	4.17762	4.35345	+
chr1	22419072	22419164	2.60324	1.93859	+
chr1	22469499	22469525	3.19105	4.24001	-
chr1	23375235	23375312	3.63635	3.00323	+
chr1	23390207	23390268	3.77568	4.19249	+
chr1	23390327	23390369	2.17334	3.75458	+
chr1	23390398	23390419	2.45655	3.83685	+
chr1	23392038	23392093	3.71019	4.43265	+
chr1	23392282	23392348	5.612	4.09617	+
chr1	23392424	23392448	2.40671	3.05924	+
chr1	23392511	23392563	6.87354	5.15878	+
chr1	23392592	23392660	7.53062	4.42181	+
chr1	23392766	23392814	2.74429	2.82195	+
chr1	23411491	23411567	3.59125	3.16962	-
chr1	23448919	23449074	27.6876	5.37459	-
chr1	23449081	23449131	5.47036	2.69246	-
chr1	23449259	23449335	5.96481	2.58466	-
chr1	23461244	23461293	2.30595	3.63475	-
chr1	23461433	23461513	2.11804	2.54979	-
chr1	23486830	23486878	2.45655	3.83685	-
chr1	23487588	23487662	3.13001	3.43265	-
chr1	23487749	23487872	3.80336	4.42723	-
chr1	23609987	23610135	5.22186	4.63475	-
chr1	23646783	23646814	2.068	3.63475	-
chr1	23646905	23646974	2.33416	3.79572	-
chr1	23646979	23647023	2.9307	4.05924	-
chr1	23647075	23647108	2.9307	4.05924	-
chr1	23649442	23649539	2.12645	2.09989	-
chr1	23686082	23686173	6.16161	5.02543	-
chr1	23884620	23884673	2.17334	3.75458	-
chr1	24114300	24114352	2.67819	4.01761	+
chr1	24163549	24163571	10.8418	3.31389	-
chr1	24752409	24752463	2.45655	3.83685	+
chr1	24791335	24791368	2.06572	3.53843	+
chr1	24791662	24791799	6.08757	4.14631	+
chr1	25145647	25145686	2.08173	3.6642	+
chr1	25168611	25168656	3.06955	3.57199	+
chr1	25169038	25169111	4.83714	2.75458	+
chr1	25170652	25170711	3.71019	4.43265	+
chr1	25805703	25805803	3.27954	4.1642	+
chr1	25811151	25811181	11.7892	4.1864	+
chr1	26144611	26144690	2.5333	2.71075	+
chr1	27057957	27058034	2.67819	4.01761	+
chr1	27190637	27190750	3.12917	0.71151	+
chr1	27190832	27190915	4.54014	3.40001	+
chr1	27425879	27425938	2.12142	2.50323	-
chr1	27634345	27634425	2.67819	4.01761	+
chr1	27686882	27687004	2.133	2.01761	-
chr1	27783962	27784030	2.91867	2.40691	-
chr1	27916964	27917003	2.18977	3.01761	-
chr1	27918616	27918656	4.55635	4.65695	-
chr1	27918734	27918781	4.1064	3.75458	-
chr1	27918798	27918862	5.48886	3.01752	-
chr1	28160920	28161014	3.94554	1.21075	+
chr1	28176984	28177045	2.37171	2.48702	+
chr1	28336267	28336314	2.45655	3.83685	-
chr1	28564567	28564603	2.40671	3.05924	+
chr1	28740122	28740240	2.19417	2.34227	+
chr1	28754752	28754815	3.08337	4.13475	+
chr1	28759742	28759795	2.40671	3.05924	+
chr1	28762494	28762550	2.9307	4.05924	+
chr1	28784456	28784548	6.04328	4.86991	+
chr1	28824848	28824901	2.31495	3.79572	+
chr1	28832664	28832687	2.24734	2.65504	+
chr1	28905265	28905292	3.84826	1.6253	-
chr1	29387047	29387158	4.78143	4.64963	+
chr1	29395407	29395485	7.59283	5.23295	+
chr1	29395490	29395544	3.27954	4.1642	+
chr1	29397386	29397461	3.19105	4.24001	+
chr1	29398194	29398261	4.03474	4.47566	+
chr1	29407253	29407331	3.89654	4.42181	+
chr1	29409055	29409138	2.45655	3.83685	+
chr1	29409941	29410001	2.17334	3.75458	+
chr1	29410674	29410796	3.41117	4.25189	+
chr1	29423266	29423338	2.5453	3.84227	+
chr1	29500287	29500334	2.17334	3.75458	-
chr1	29572254	29572311	9.62251	5.68058	+
chr1	29572350	29572376	2.65443	3.24001	+
chr1	29572427	29572470	2.95517	2.92723	+
chr1	29572506	29572580	6.19262	4.10405	+
chr1	29572684	29572764	3.09228	2.66099	+
chr1	29573527	29573607	2.84926	3.36447	+
chr1	29573631	29573692	2.18977	3.01761	+
chr1	29637627	29637669	2.18977	3.01761	+
chr1	29653228	29653263	3.19105	4.24001	+
chr1	31342542	31342613	3.71019	4.43265	-
chr1	31355772	31355858	2.30507	3.74595	-
chr1	31404415	31404493	4.04796	4.50323	-
chr1	31405108	31405160	3.61457	3.60258	-
chr1	31405211	31405251	3.61457	3.60258	-
chr1	31405670	31405728	2.84406	3.25189	-
chr1	31405768	31405828	2.30507	3.74595	-
chr1	31431604	31431697	3.53633	3.98497	-
chr1	31434749	31434802	2.40671	3.05924	-
chr1	31435162	31435202	3.41117	4.25189	-
chr1	31441010	31441072	8.47215	3.08062	-
chr1	31737604	31737671	2.9307	4.05924	-
chr1	31739915	31740016	3.94994	4.19249	-
chr1	31886102	31886124	3.19105	4.24001	+
chr1	31886939	31887028	2.40594	1.4225	+
chr1	31888624	31888690	2.63884	1.72504	+
chr1	31888764	31888826	5.612	4.09617	+
chr1	31889389	31889410	2.18977	3.01761	+
chr1	31889910	31889941	4.15124	2.44453	+
chr1	31890164	31890171	4.20239	3.71132	+
chr1	31890174	31890410	15.1352	4.15087	+
chr1	31890429	31890451	4.13228	2.57382	+
chr1	31890494	31890571	12.7514	4.57607	+
chr1	31893641	31893720	2.87452	1.46339	+
chr1	31896550	31896610	2.8122	2.43265	+
chr1	31897649	31897702	2.43436	2.40691	+
chr1	31904603	31904626	2.00284	1.28453	+
chr1	31904649	31904708	2.70066	1.03191	+
chr1	31904740	31905090	8.11363	1.52615	+
chr1	31907192	31907241	2.8315	2.57382	+
chr1	31970489	31970525	2.55524	3.13475	-
chr1	32042139	32042186	3.26871	2.40691	+
chr1	32042795	32042893	6.55938	3.74595	+
chr1	32049456	32049504	2.65443	3.24001	+
chr1	32050827	32050873	2.45655	3.83685	+
chr1	32052714	32052827	11.3843	5.01761	+
chr1	32135294	32135357	5.02763	4.63475	-
chr1	32543335	32543459	3.43968	3.07199	+
chr1	32577102	32577202	6.76605	4.09352	+
chr1	32577543	32577620	2.88442	3.08216	+
chr1	32578498	32578547	3.04468	4.13475	+
chr1	32601616	32601747	2.70438	2.94047	+
chr1	32650864	32650912	2.08173	3.6642	+
chr1	33066029	33066214	3.58248	4.33091	+
chr1	33101385	33101455	2.01216	2.47428	-
chr1	33300389	33300434	3.89654	4.42181	+
chr1	33303215	33303285	2.45655	3.83685	+
chr1	33313979	33314079	4.20239	3.71132	+
chr1	33318177	33318292	3.91195	3.45668	+
chr1	33474470	33474511	4.20239	3.71132	-
chr1	33474662	33474789	11.7501	4.1272	-
chr1	33474902	33474978	10.8188	4.0882	-
chr1	33475473	33475494	2.18977	3.01761	-
chr1	33475696	33475743	5.53443	4.6272	-
chr1	33475758	33475827	13.9731	5.20609	-
chr1	33476264	33476357	6.02103	2.58632	-
chr1	33497684	33497762	3.89654	4.42181	-
chr1	33497809	33497867	2.45655	3.83685	-
chr1	33809720	33809835	2.25444	2.19249	-
chr1	33817782	33817872	3.89654	4.42181	-
chr1	33817893	33817955	2.62248	3.84227	-
chr1	33818653	33818792	3.89654	4.42181	-
chr1	33820736	33820880	5.29397	4.89208	+
chr1	33882612	33882695	2.45655	3.83685	-
chr1	35554889	35554957	3.53197	4.29572	+
chr1	35564813	35564885	2.30595	3.63475	+
chr1	35567214	35567305	4.52501	4.53843	+
chr1	35646079	35646124	3.72419	3.57199	-
chr1	35646141	35646194	9.53265	5.6272	-
chr1	35646348	35646442	2.92123	1.52805	-
chr1	35741809	35741860	3.03494	4.0882	+
chr1	35741957	35742078	2.9664	3.29572	+
chr1	35825580	35825688	2.95856	2.8907	+
chr1	35840840	35840900	2.17334	3.75458	+
chr1	35842849	35842908	6.37182	5.05924	+
chr1	35843254	35843365	6.06306	4.03843	+
chr1	35964737	35964899	3.13005	3.61147	-
chr1	36005493	36005547	2.18977	3.01761	-
chr1	36031830	36031884	2.17334	3.75458	+
chr1	36067451	36067551	2.33225	2.84227	-
chr1	36068583	36068667	5.60871	4.05924	-
chr1	36103398	36103457	2.45655	3.83685	-
chr1	36180872	36180964	4.83714	2.75458	-
chr1	36181057	36181143	2.37009	1.65504	-
chr1	36386902	36386966	5.34502	2.84769	+
chr1	36388145	36388273	6.55134	2.25731	+
chr1	36406854	36406926	3.74304	3.57382	+
chr1	36748796	36748881	2.9307	4.05924	+
chr1	36781334	36781434	3.56068	4.34227	+
chr1	36786997	36787017	2.67819	4.01761	+
chr1	36787404	36787460	2.55524	3.13475	+
chr1	36787491	36787606	8.86739	2.35504	+
chr1	36787676	36787714	2.17334	3.75458	-
chr1	36789894	36790056	4.37949	4.53843	+
chr1	36793459	36793709	5.77005	4.20955	+
chr1	37961776	37961872	11.6693	4.78968	-
chr1	37962176	37962224	4.5476	3.36737	-
chr1	37962328	37962354	4.38574	4.57382	-
chr1	37962370	37962421	4.88814	4.69249	-
chr1	37962586	37962623	6.87354	5.15878	-
chr1	37962642	37962681	3.08337	4.13475	-
chr1	38050214	38050276	3.41117	4.25189	-
chr1	38528622	38528693	2.18977	3.01761	+
chr1	39327877	39327967	2.73983	3.21971	+
chr1	39457672	39457717	2.02655	2.11072	+
chr1	39458514	39458587	2.8315	2.57382	+
chr1	39577579	39577689	4.42302	4.19249	+
chr1	39578692	39578735	3.24124	2.98885	+
chr1	39578743	39578828	2.97354	1.88127	+
chr1	39593016	39593081	3.67384	3.40691	+
chr1	39593719	39593779	2.67819	4.01761	+
chr1	39594443	39594560	13.1838	5.78238	+
chr1	39594689	39594722	2.82102	2.83685	+
chr1	39595403	39595490	4.99317	2.92402	+
chr1	39595942	39596056	7.19119	4.45668	+
chr1	39596176	39596246	2.17334	3.75458	+
chr1	39600385	39600509	3.29357	2.2555	+
chr1	39600578	39600642	6.58141	3.95668	+
chr1	39605178	39605230	2.84406	3.25189	+
chr1	39605251	39605313	2.67819	4.01761	+
chr1	39622431	39622480	2.45655	3.83685	+
chr1	39622511	39622591	2.82102	2.83685	+
chr1	39687727	39687786	2.45655	3.83685	+
chr1	39771515	39771656	4.7691	4.24595	+
chr1	39793678	39793720	2.068	3.63475	+
chr1	39794161	39794204	2.9307	4.05924	+
chr1	39813426	39813638	6.95346	2.88418	+
chr1	39814043	39814134	5.11445	3.71075	+
chr1	39868593	39868643	2.17334	3.75458	+
chr1	39890947	39891046	12.6221	3.6658	+
chr1	39891115	39891186	3.61911	3.13475	+
chr1	39891215	39891279	6.06976	5.00323	+
chr1	39891308	39891339	4.87844	4.71132	+
chr1	39902700	39902776	3.67881	3.5882	+
chr1	39930864	39930956	3.60695	2.89208	+
chr1	39934992	39935038	2.79226	4.00323	+
chr1	39935299	39935423	4.80406	4.71971	+
chr1	39936501	39936639	2.06052	2.27951	+
chr1	39947620	39947694	3.82271	4.42723	+
chr1	40321337	40321405	2.84406	3.25189	-
chr1	40328743	40328839	6.08901	3.42973	-
chr1	40339907	40340020	5.36621	3.25872	-
chr1	40516571	40516680	3.90702	3.98497	+
chr1	40633318	40633438	5.37387	4.83685	+
chr1	40671764	40671818	2.08173	3.6642	+
chr1	40672289	40672305	2.45655	3.83685	+
chr1	40672360	40672406	4.38574	4.57382	+
chr1	40692176	40692285	4.38574	4.57382	+
chr1	41008126	41008196	2.08173	3.6642	+
chr1	41510079	41510242	5.94185	4.92723	-
chr1	41542388	41542472	2.18977	3.01761	-
chr1	41542473	41542540	2.40671	3.05924	-
chr1	41542619	41542679	2.40671	3.05924	-
chr1	41544746	41544819	2.9307	4.05924	-
chr1	41635256	41635300	2.17334	3.75458	-
chr1	41691166	41691233	2.9307	4.05924	-
chr1	42010842	42010907	2.17334	3.75458	-
chr1	42219463	42219543	2.79323	3.79572	-
chr1	42220596	42220645	2.9307	4.05924	-
chr1	42338190	42338257	2.67819	4.01761	-
chr1	42366476	42366622	8.64958	5.45427	-
chr1	42367353	42367482	7.63032	5.31645	-
chr1	42370897	42371076	8.56979	5.21878	-
chr1	42375631	42375930	6.4584	5.04697	-
chr1	42377018	42377109	4.02263	4.35345	-
chr1	42377910	42378045	2.54863	3.71971	-
chr1	42409310	42409425	3.03259	4.00323	-
chr1	42448474	42448529	2.17334	3.75458	-
chr1	42454202	42454287	3.08337	4.13475	-
chr1	42463579	42463687	2.68403	2.84769	-
chr1	42463740	42463807	2.97068	3.23295	-
chr1	42465054	42465131	4.11233	4.47566	-
chr1	42642235	42642336	5.59842	2.26849	-
chr1	42642343	42642393	2.67819	4.01761	-
chr1	42643388	42643422	3.71019	4.43265	-
chr1	42643717	42643793	3.08035	2.84227	-
chr1	42643804	42643882	6.90609	2.94723	-
chr1	42656082	42656150	2.78312	2.92723	-
chr1	42656407	42656457	2.45655	3.83685	-
chr1	42692898	42692969	2.9307	4.05924	-
chr1	42745705	42745758	2.54863	3.71971	-
chr1	42755648	42755785	2.74924	3.24595	-
chr1	42777121	42777217	3.53197	4.29572	-
chr1	42783317	42783430	2.77166	2.84227	-
chr1	42783443	42783508	3.89654	4.42181	-
chr1	43150380	43150619	3.90702	3.98497	+
chr1	43156371	43156438	2.06384	2.25189	+
chr1	43391878	43391938	3.23514	2.51492	-
chr1	43410439	43410580	2.50654	2.16962	-
chr1	44048918	44049083	20.4064	2.78968	+
chr1	44053259	44053317	3.39262	2.25731	+
chr1	44053396	44053547	6.90534	2.71231	+
chr1	44070414	44070460	2.17334	3.75458	+
chr1	44202915	44203016	2.5087	3.50323	+
chr1	44281087	44281147	2.55202	3.90691	+
chr1	44281236	44281267	2.9307	4.05924	+
chr1	44327232	44327257	2.45655	3.83685	+
chr1	44327278	44327381	4.95322	3.51596	+
chr1	44327871	44327916	3.41117	4.25189	+
chr1	44328077	44328241	9.175	5.53843	+
chr1	44440961	44441002	2.17334	3.75458	+
chr1	44813402	44813450	2.01216	2.47428	-
chr1	44894253	44894296	3.89654	4.42181	+
chr1	44894357	44894445	7.49754	4.16179	+
chr1	44908858	44908902	5.0323	4.69939	+
chr1	44908951	44909128	29.9233	4.88452	+
chr1	44909182	44909226	10.934	5.77545	+
chr1	44910875	44910997	4.28348	3.29572	+
chr1	44911200	44911239	3.41117	4.25189	+
chr1	44913387	44913406	2.45655	3.83685	+
chr1	44913495	44913637	13.1878	6.10307	+
chr1	44913648	44913721	11.9582	5.89575	+
chr1	44924031	44924079	2.67819	4.01761	+
chr1	44930097	44930147	3.58248	4.33091	+
chr1	44930443	44930535	6.56488	5.0512	+
chr1	44939423	44939486	4.20239	3.71132	+
chr1	44963482	44963603	4.66696	3.83685	+
chr1	44964653	44964707	2.07538	2.84227	+
chr1	44964781	44964881	4.86019	3.71971	+
chr1	44965286	44965341	2.67819	4.01761	+
chr1	44966026	44966135	9.92086	5.56374	+
chr1	44966461	44966492	2.84406	3.25189	+
chr1	44992186	44992209	3.89654	4.42181	+
chr1	44992240	44992274	7.88207	5.33935	+
chr1	44992296	44992343	5.53656	4.78968	+
chr1	44992392	44992489	9.53073	4.21075	+
chr1	44992502	44992582	8.11401	5.33377	+
chr1	44992682	44992772	10.7429	5.73948	+
chr1	45005449	45005525	2.8238	4.03843	+
chr1	45013065	45013146	5.37387	4.83685	+
chr1	45040826	45040866	2.40671	3.05924	+
chr1	45875041	45875086	2.67819	4.01761	-
chr1	46030232	46030284	2.17334	3.75458	+
chr1	46064530	46064578	2.31495	3.79572	+
chr1	46074090	46074267	16.5414	3.45312	+
chr1	46074317	46074414	57.1399	4.133	+
chr1	46074419	46074499	15.6576	5.62112	+
chr1	46074595	46074611	6.87354	5.15878	+
chr1	46074646	46074672	7.53062	4.42181	+
chr1	46074701	46074714	7.88207	5.33935	+
chr1	46074880	46074932	15.6576	6.33935	+
chr1	46078063	46078150	4.87008	3.92221	+
chr1	46078251	46078334	4.50066	3.79572	+
chr1	46467313	46467432	3.16845	2.75458	+
chr1	46713506	46713591	4.76246	4.75458	+
chr1	46713623	46713696	4.38574	4.57382	+
chr1	46713740	46713870	8.86306	4.66239	+
chr1	46734192	46734249	2.9307	4.05924	+
chr1	46741797	46741889	2.40671	3.05924	+
chr1	47763872	47763993	3.28988	3.42181	-
chr1	47882049	47882076	10.4743	5.64963	+
chr1	48867857	48867896	2.45655	3.83685	-
chr1	50931070	50931124	2.17334	3.75458	-
chr1	50931312	50931377	2.84406	3.25189	-
chr1	51027617	51027693	2.30595	3.63475	-
chr1	51076150	51076257	2.01216	2.47428	-
chr1	51092265	51092371	2.84406	3.25189	-
chr1	51142677	51142739	2.45655	3.83685	-
chr1	51143990	51144034	2.18977	3.01761	-
chr1	51167177	51167211	2.45655	3.83685	-
chr1	51257103	51257186	11.1404	5.83091	-
chr1	51290605	51290675	2.068	3.63475	-
chr1	51312874	51313003	2.78799	3.92723	-
chr1	51315934	51316003	3.71019	4.43265	-
chr1	51344521	51344596	2.40671	3.05924	-
chr1	51396579	51396674	2.06052	2.27951	-
chr1	51408068	51408203	4.82571	2.63475	-
chr1	51423849	51423885	2.45655	3.83685	-
chr1	51705998	51706070	3.41117	4.25189	+
chr1	51857298	51857429	2.59182	3.81901	-
chr1	51908529	51908584	2.9307	4.05924	-
chr1	51916749	51916840	2.36291	3.74595	-
chr1	51923052	51923100	2.40671	3.05924	-
chr1	51923611	51923679	3.89654	4.42181	-
chr1	51923846	51923890	2.84406	3.25189	-
chr1	51979296	51979363	2.17334	3.75458	-
chr1	52205670	52205800	2.5453	3.84227	+
chr1	52206037	52206077	2.14263	3.53843	+
chr1	52218459	52218520	2.45655	3.83685	+
chr1	52222241	52222312	3.56068	4.34227	+
chr1	52222357	52222425	4.78048	3.45775	+
chr1	52222512	52222593	3.23453	2.98702	+
chr1	52730442	52730514	3.08337	4.13475	+
chr1	52730669	52730742	4.02603	4.42723	+
chr1	52730922	52730986	2.33416	3.79572	+
chr1	52818259	52818320	2.45655	3.83685	-
chr1	52899153	52899211	3.13001	3.43265	-
chr1	52899267	52899345	4.49699	4.47207	-
chr1	52900090	52900167	6.36411	3.75439	-
chr1	53383146	53383191	3.59125	3.16962	-
chr1	53383258	53383334	4.27258	4.40691	-
chr1	53738063	53738249	30.1009	3.64717	-
chr1	53738939	53739010	7.21119	3.69249	-
chr1	54387466	54387531	2.9307	4.05924	-
chr1	54497500	54497586	4.60432	3.89208	-
chr1	55063239	55063303	2.45655	3.83685	+
chr1	55315325	55315507	9.71171	3.041	-
chr1	55315598	55315658	4.81322	2.85656	-
chr1	55315675	55315710	5.10763	4.01761	-
chr1	55530442	55530506	3.94994	4.19249	+
chr1	55587755	55587797	2.06572	3.53843	-
chr1	55588006	55588058	4.38574	4.57382	-
chr1	55588302	55588374	4.7752	4.50323	-
chr1	55588668	55588739	6.60267	5.13475	-
chr1	55629874	55629937	2.9307	4.05924	-
chr1	55630890	55631008	2.32316	3.42723	-
chr1	59004286	59004350	2.44177	2.42181	-
chr1	59005841	59005928	5.82528	4.11572	-
chr1	59006014	59006052	3.89654	4.42181	-
chr1	59006078	59006175	8.32426	4.57199	-
chr1	59007756	59007843	4.15157	3.50323	-
chr1	59041113	59041208	3.02367	2.47379	-
chr1	59041225	59041256	2.17334	3.75458	-
chr1	59042769	59042833	2.5054	2.92723	-
chr1	59121224	59121289	2.18977	3.01761	-
chr1	59123591	59123619	3.74304	3.57382	-
chr1	59123812	59123864	4.74013	4.29572	-
chr1	59124105	59124157	8.38806	5.42181	-
chr1	59124203	59124263	2.05843	1.26627	-
chr1	59124307	59124351	2.5081	2.12785	-
chr1	59125083	59125237	2.52032	1.54392	-
chr1	59136908	59136983	2.18977	3.01761	-
chr1	59137128	59137233	4.61164	3.83091	-
chr1	59152415	59152488	3.67384	3.40691	-
chr1	59247269	59247327	4.18509	1.49	-
chr1	59247350	59247408	2.23156	1.42033	-
chr1	59247537	59247574	4.05443	3.01761	-
chr1	60045799	60045846	2.45655	3.83685	+
chr1	61568192	61568222	2.17334	3.75458	+
chr1	61573095	61573139	2.56737	3.92723	+
chr1	61578403	61578503	3.67384	3.40691	+
chr1	61587884	61587975	12.1441	5.95427	+
chr1	61588078	61588104	3.74304	3.57382	+
chr1	61588181	61588209	3.28988	3.42181	+
chr1	61588853	61588904	2.01216	2.47428	+
chr1	61607152	61607186	2.45655	3.83685	+
chr1	61608338	61608436	6.60311	4.29572	+
chr1	61611506	61611557	2.45655	3.83685	+
chr1	61615117	61615167	2.45655	3.83685	+
chr1	61615235	61615326	2.37725	2.40691	+
chr1	61623868	61623925	3.71019	4.43265	+
chr1	61623947	61624186	7.80654	4.04467	+
chr1	61625195	61625277	2.9307	4.05924	+
chr1	61643068	61643137	2.01216	2.47428	+
chr1	61650692	61650734	2.84406	3.25189	+
chr1	61650767	61650837	5.99217	3.09989	+
chr1	61651247	61651353	3.56068	4.34227	+
chr1	61651433	61651474	2.45655	3.83685	+
chr1	61691734	61691862	2.47865	2.27951	+
chr1	61696125	61696355	7.13624	4.60421	+
chr1	61700209	61700319	3.32045	4.24595	+
chr1	61825820	61825873	2.45655	3.83685	+
chr1	61885810	61885859	3.89654	4.42181	+
chr1	61922662	61922707	2.18977	3.01761	+
chr1	61926435	61926548	5.29397	4.89208	+
chr1	62170756	62170818	2.068	3.63475	-
chr1	62173084	62173232	2.11604	2.74595	-
chr1	62214319	62214363	2.45655	3.83685	+
chr1	62294441	62294509	2.40671	3.05924	+
chr1	62322943	62322997	3.41117	4.25189	+
chr1	62400346	62400413	3.03958	3.86447	+
chr1	62578484	62578565	2.5453	3.84227	+
chr1	62917286	62917336	3.71019	4.43265	+
chr1	63009678	63009727	2.9307	4.05924	-
chr1	63009938	63010012	3.03958	3.86447	-
chr1	63010380	63010417	3.74304	3.57382	-
chr1	63010649	63010727	5.37387	4.83685	-
chr1	63010744	63010830	3.19105	4.24001	-
chr1	63046734	63046796	2.17334	3.75458	-
chr1	63158278	63158373	3.52589	4.23295	+
chr1	63250327	63250476	4.02563	4.24595	+
chr1	64245185	64245291	4.38574	4.57382	+
chr1	64272906	64273013	8.17438	4.31157	+
chr1	64281217	64281293	2.45655	3.83685	+
chr1	64287965	64288044	3.28737	4.21971	+
chr1	64299451	64299496	2.17334	3.75458	+
chr1	64302378	64302406	2.06572	3.53843	+
chr1	64302459	64302512	3.03259	4.00323	+
chr1	64309740	64309825	4.31	4.5882	+
chr1	64310018	64310067	3.19105	4.24001	+
chr1	64315849	64315927	2.5912	3.0882	+
chr1	64321668	64321739	2.65443	3.24001	+
chr1	64355987	64356117	4.1064	3.75458	+
chr1	64366535	64366599	6.04096	4.79572	+
chr1	64366837	64366903	5.818	4.95668	+
chr1	64423736	64423831	2.9307	4.05924	+
chr1	64646966	64647030	2.7195	3.50323	+
chr1	65272166	65272232	2.67819	4.01761	+
chr1	67405021	67405068	2.17334	3.75458	+
chr1	67434461	67434581	2.51691	3.13475	+
chr1	67876520	67876600	2.39823	2.50323	-
chr1	67877739	67877838	13.2283	4.29628	-
chr1	67877974	67878049	8.38174	3.053	-
chr1	67878118	67878145	2.15602	2.54979	-
chr1	67878175	67878223	4.13036	3.50922	-
chr1	68168984	68169104	2.15284	2.63475	-
chr1	68189040	68189076	2.30507	3.74595	-
chr1	68189548	68189576	2.9307	4.05924	-
chr1	68209528	68209703	3.02093	3.84792	-
chr1	68269698	68269744	2.08173	3.6642	-
chr1	68284513	68284549	2.9307	4.05924	-
chr1	68284727	68284871	10.7579	5.76345	-
chr1	68362261	68362400	3.03958	3.86447	+
chr1	68591447	68591514	2.40671	3.05924	-
chr1	68591534	68591627	2.29824	3.03843	-
chr1	68652987	68653092	5.40365	2.72605	-
chr1	68654301	68654388	3.77832	4.36447	-
chr1	68654571	68654598	2.06572	3.53843	-
chr1	68654646	68654692	4.36967	3.69939	-
chr1	68947632	68947717	5.0862	4.8017	-
chr1	68948703	68948766	2.06572	3.53843	-
chr1	70696392	70696428	2.38727	2.26627	+
chr1	70696509	70696583	4.74706	3.59352	+
chr1	70696610	70696673	4.48122	3.05924	+
chr1	70696980	70697039	4.09594	2.7035	+
chr1	70697349	70697399	5.48504	2.83685	+
chr1	70712990	70713050	2.30595	3.63475	+
chr1	70714816	70714910	5.34582	3.25189	+
chr1	70744360	70744418	2.5453	3.84227	-
chr1	70746072	70746126	2.17334	3.75458	-
chr1	70777299	70777404	2.9307	4.05924	-
chr1	72650183	72650260	4.31	4.5882	-
chr1	76253544	76253661	6.36924	1.45849	+
chr1	76254426	76254516	7.87928	2.42887	+
chr1	76254605	76254680	11.4706	4.95233	+
chr1	76257517	76257573	2.84406	3.25189	+
chr1	76264712	76264786	2.78799	3.92723	+
chr1	77619010	77619086	2.31495	3.79572	-
chr1	78056556	78056643	2.48838	2.25189	-
chr1	78066272	78066341	2.55202	3.90691	-
chr1	78074437	78074512	2.30507	3.74595	-
chr1	78081234	78081269	2.67819	4.01761	-
chr1	78090069	78090148	4.3295	4.5882	-
chr1	78161808	78161875	4.0779	2.81116	-
chr1	78162041	78162099	2.8122	2.43265	-
chr1	78343007	78343148	3.60695	2.89208	+
chr1	78409834	78409892	2.65443	3.24001	-
chr1	78413599	78413665	3.50174	3.56097	-
chr1	78413717	78413853	4.3515	4.07459	-
chr1	78413908	78413960	2.73773	3.03843	-
chr1	78415214	78415350	3.90503	2.23134	-
chr1	78415463	78415556	6.55199	4.94211	-
chr1	78415675	78415704	2.84406	3.25189	-
chr1	78448076	78448226	6.95746	3.47251	+
chr1	78449508	78449555	2.78799	3.92723	+
chr1	78449651	78449753	5.91621	2.5414	+
chr1	78449892	78449913	2.9307	4.05924	+
chr1	78450011	78450050	2.52488	3.00323	+
chr1	78454425	78454491	2.30595	3.63475	+
chr1	78470037	78470123	2.01216	2.47428	+
chr1	78482671	78482727	3.19105	4.24001	+
chr1	84546967	84547037	2.84406	3.25189	+
chr1	84569793	84569897	2.07831	3.34227	+
chr1	84574137	84574234	2.5453	3.84227	+
chr1	84617036	84617089	3.19105	4.24001	+
chr1	85318395	85318471	2.45655	3.83685	-
chr1	85320290	85320358	2.40671	3.05924	-
chr1	85341086	85341232	3.38025	3.07394	-
chr1	85341627	85341690	7.04624	4.33935	-
chr1	85343571	85343656	5.53656	4.78968	-
chr1	85488279	85488357	4.02603	4.42723	-
chr1	85488363	85488436	5.68033	3.63475	-
chr1	85489026	85489132	5.45966	4.16984	-
chr1	85489234	85489283	2.16833	2.45347	-
chr1	85489878	85489998	10.4468	5.64594	-
chr1	85490986	85491118	11.6631	4.98603	-
chr1	85491200	85491262	4.87844	4.71132	-
chr1	85514444	85514466	2.70352	2.86447	+
chr1	85924651	85924704	2.67819	4.01761	-
chr1	85925610	85925660	2.17334	3.75458	-
chr1	85955274	85955342	2.67819	4.01761	-
chr1	86048812	86048849	2.52478	1.90691	+
chr1	86048942	86048999	7.4122	4.92723	+
chr1	86049265	86049327	8.32334	2.28245	+
chr1	86833962	86834071	11.7532	3.33249	-
chr1	86921999	86922069	3.26618	2.36737	+
chr1	86922098	86922160	2.25556	1.62877	+
chr1	87342422	87342464	2.56737	3.92723	-
chr1	87350910	87350950	2.17334	3.75458	-
chr1	87380551	87380598	2.17334	3.75458	+
chr1	87387859	87387920	2.45655	3.83685	+
chr1	87427358	87427526	2.80235	3.5882	+
chr1	87575409	87575478	2.63974	3.00323	+
chr1	87575519	87575563	2.17334	3.75458	+
chr1	87810734	87810802	2.65443	3.24001	+
chr1	89154248	89154343	2.54738	2.75731	+
chr1	89154418	89154502	6.08492	4.15878	+
chr1	89155629	89155718	2.84406	3.25189	+
chr1	89161835	89161935	5.33392	4.86447	+
chr1	89162634	89162688	2.30507	3.74595	+
chr1	89185024	89185081	2.06572	3.53843	+
chr1	89208957	89209006	2.45655	3.83685	+
chr1	89254638	89254758	2.80973	1.95519	+
chr1	89280129	89280266	6.60267	5.13475	+
chr1	89280289	89280341	3.74304	3.57382	+
chr1	89290693	89290774	2.84406	3.25189	+
chr1	89297799	89297857	3.28737	4.21971	+
chr1	89297930	89298024	3.21354	3.21075	+
chr1	89357167	89357194	15.6576	6.67848	-
chr1	90100573	90100637	2.10648	3.63475	+
chr1	90107683	90107729	2.17334	3.75458	+
chr1	90121231	90121361	3.65822	4.31653	+
chr1	90121389	90121447	2.45655	3.83685	+
chr1	90315118	90315160	2.9307	4.05924	+
chr1	90315323	90315434	4.27488	3.91552	+
chr1	90316307	90316424	5.28405	4.74595	+
chr1	90337188	90337240	2.31495	3.79572	+
chr1	90346675	90346718	2.45655	3.83685	+
chr1	90353025	90353108	4.87844	4.71132	+
chr1	90353210	90353262	3.89654	4.42181	+
chr1	90357404	90357533	4.78143	4.64963	+
chr1	90382787	90382878	2.41072	2.66693	+
chr1	90391539	90391614	2.33416	3.79572	+
chr1	90401478	90401536	2.74041	2.60258	+
chr1	90484893	90484954	2.08173	3.6642	+
chr1	91390424	91390630	2.4198	2.03153	-
chr1	91396049	91396113	2.45655	3.83685	-
chr1	91399981	91400063	5.54362	4.84227	-
chr1	91400105	91400145	2.31495	3.79572	-
chr1	91401199	91401281	4.61164	3.83091	-
chr1	91428868	91428915	3.41117	4.25189	-
chr1	91430582	91430646	3.78839	4.40691	-
chr1	91470292	91470362	2.08512	2.92723	-
chr1	91853094	91853155	7.80101	3.16099	-
chr1	91968290	91968402	4.1544	3.73295	+
chr1	91968500	91968553	2.32319	2.63475	+
chr1	92742161	92742211	2.01216	2.47428	-
chr1	92761330	92761397	3.04468	4.13475	-
chr1	92761447	92761512	3.06087	4.14963	-
chr1	92761529	92761588	2.9307	4.05924	-
chr1	92761634	92761669	2.18977	3.01761	-
chr1	92761786	92761847	3.03494	4.0882	-
chr1	92772500	92772601	2.08512	2.92723	+
chr1	92777479	92777573	4.76246	4.75458	+
chr1	92796946	92796994	3.19105	4.24001	+
chr1	92826203	92826250	2.18977	3.01761	+
chr1	92830212	92830302	6.81628	4.31645	+
chr1	92830517	92830589	4.5476	3.36737	+
chr1	92830673	92830727	2.29824	3.03843	+
chr1	92992022	92992126	9.35587	4.72802	-
chr1	93003474	93003579	3.37629	4.1642	-
chr1	93051226	93051317	5.0862	4.8017	-
chr1	93076223	93076305	2.14263	3.53843	-
chr1	93084623	93084708	3.28988	3.42181	-
chr1	93127545	93127686	13.9603	3.33623	-
chr1	93128461	93128515	8.01728	4.49982	-
chr1	93128550	93128572	4.38574	4.57382	-
chr1	93128604	93128703	12.3681	4.58998	-
chr1	93128722	93128867	12.4426	4.84563	-
chr1	93128916	93128932	3.41117	4.25189	-
chr1	93202738	93202816	2.45655	3.83685	-
chr1	93545860	93545892	2.45655	3.83685	+
chr1	93545949	93546024	4.38668	3.79572	+
chr1	93593379	93593422	2.17334	3.75458	+
chr1	93717572	93717654	3.24124	2.98885	+
chr1	93737477	93737518	2.67819	4.01761	+
chr1	93929015	93929158	2.82102	2.83685	+
chr1	93966170	93966359	3.15798	2.79411	+
chr1	94018033	94018155	5.48205	2.51065	+
chr1	94018540	94018590	2.08173	3.6642	+
chr1	94019307	94019411	2.50654	2.16962	+
chr1	94027413	94027482	3.19105	4.24001	-
chr1	94055471	94055583	3.19608	3.36447	-
chr1	94061726	94061789	3.06261	2.34227	-
chr1	94062695	94062735	4.05834	3.30712	-
chr1	94062846	94062985	3.18201	1.9514	-
chr1	94063067	94063171	2.65642	1.71578	-
chr1	94064212	94064263	2.01216	2.47428	-
chr1	94064567	94064636	2.1139	2.74595	-
chr1	94072337	94072369	2.06572	3.53843	-
chr1	94072761	94072802	4.05764	2.95233	-
chr1	94072927	94072979	2.76836	3.24595	-
chr1	94073013	94073071	3.13259	3.01761	-
chr1	94105894	94105971	2.3245	2.43265	-
chr1	94116398	94116503	6.40153	3.89653	-
chr1	94116694	94116719	2.01216	2.47428	-
chr1	94119796	94119814	2.17334	3.75458	-
chr1	94127461	94127564	6.38493	3.71674	-
chr1	94136294	94136425	7.33827	3.11148	-
chr1	94137396	94137493	6.55696	5.00323	-
chr1	94140736	94140814	2.11113	2.90691	-
chr1	94143127	94143187	3.41117	4.25189	-
chr1	94143223	94143290	3.04468	4.13475	-
chr1	94143331	94143386	3.89654	4.42181	-
chr1	94145939	94146023	4.83985	4.73295	-
chr1	94146444	94146528	2.34065	2.03153	-
chr1	94204819	94204930	5.78956	4.83091	-
chr1	94209644	94209709	2.8238	4.03843	-
chr1	94221860	94221921	2.97068	3.23295	-
chr1	94233786	94233859	4.38668	3.79572	-
chr1	94234201	94234268	4.23426	4.60258	-
chr1	94239253	94239317	2.11804	2.54979	-
chr1	94313171	94313220	20.0833	4.32678	+
chr1	94639059	94639153	2.30024	2.84227	-
chr1	94639243	94639295	2.4022	3.63475	-
chr1	94657871	94657924	2.24734	2.65504	-
chr1	94662716	94662756	2.40671	3.05924	-
chr1	94665491	94665628	2.26015	2.69131	-
chr1	94665700	94665769	2.54245	3.53843	-
chr1	94665873	94665913	3.19105	4.24001	-
chr1	94688273	94688333	2.65029	2.34227	-
chr1	94688773	94688838	3.8256	2.88068	-
chr1	94689175	94689288	10.1042	4.58695	-
chr1	94689802	94689902	9.77007	3.1413	-
chr1	94692916	94692963	2.17334	3.75458	-
chr1	94702698	94702795	2.19215	2.45347	-
chr1	94709497	94709552	2.31745	3.03843	-
chr1	94891827	94891902	2.45655	3.83685	+
chr1	94892423	94892452	2.45655	3.83685	+
chr1	94892464	94892601	8.81852	4.63475	+
chr1	94892632	94892691	3.30111	4.24595	+
chr1	94994863	94994988	58.9036	2.83441	-
chr1	94995016	94995151	29.0012	2.8336	-
chr1	94995167	94995278	6.69719	1.09998	-
chr1	94995698	94995784	13.232	2.14059	-
chr1	94997798	94997872	2.37918	1.67979	-
chr1	95001174	95001251	4.77246	1.39111	-
chr1	95005414	95005425	2.9307	4.05924	-
chr1	95006859	95006909	3.54507	2.02603	-
chr1	95007000	95007096	3.46631	1.60076	-
chr1	95007121	95007196	4.66669	2.2035	-
chr1	95007223	95007266	4.10563	3.25189	-
chr1	95007279	95007294	3.13001	3.43265	-
chr1	97244310	97244341	2.45655	3.83685	+
chr1	97252595	97252637	2.40671	3.05924	+
chr1	97253571	97253623	5.01336	3.54813	+
chr1	97254080	97254187	15.6576	6.29346	+
chr1	97254225	97254311	7.68211	5.34227	+
chr1	97254368	97254420	8.01728	4.49982	+
chr1	97255841	97255914	4.86019	3.71971	+
chr1	97256005	97256095	8.55942	4.5882	+
chr1	97257956	97257979	2.01216	2.47428	+
chr1	97258558	97258743	3.17351	2.52001	+
chr1	97264302	97264390	3.17331	2.79572	+
chr1	97271312	97271423	4.36754	3.57199	+
chr1	97271819	97271849	2.45655	3.83685	+
chr1	97272167	97272246	5.94174	4.11572	+
chr1	97834579	97834667	3.7736	4.29572	-
chr1	97835436	97835491	2.06572	3.53843	-
chr1	97892249	97892301	2.45655	3.83685	-
chr1	97894418	97894497	4.38574	4.57382	-
chr1	98026450	98026523	2.55202	3.90691	-
chr1	98026536	98026630	4.29431	4.57199	-
chr1	98114450	98114592	4.02263	4.35345	-
chr1	98136694	98136778	2.60163	3.42723	-
chr1	98228791	98228853	2.9307	4.05924	-
chr1	98266967	98267131	4.5741	4.6642	-
chr1	98279769	98279849	5.041	4.74595	-
chr1	98279951	98280029	2.54863	3.71971	-
chr1	98280727	98280798	2.45655	3.83685	-
chr1	98280952	98281018	2.45655	3.83685	-
chr1	98332271	98332337	2.17334	3.75458	-
chr1	99225008	99225076	2.068	3.63475	+
chr1	100464389	100464459	2.9307	4.05924	+
chr1	100465200	100465330	4.48886	4.44861	+
chr1	100474423	100474499	2.01216	2.47428	+
chr1	100547981	100548130	2.77036	3.04979	+
chr1	100548477	100548537	2.68403	2.84769	+
chr1	100548631	100548685	3.28988	3.42181	+
chr1	100548715	100548765	3.03494	4.0882	+
chr1	100610205	100610349	3.50287	4.23044	+
chr1	100611123	100611178	5.02763	4.63475	+
chr1	100704502	100704593	3.28737	4.21971	-
chr1	101356772	101356854	2.01216	2.47428	-
chr1	101364847	101364900	3.27894	4.07199	+
chr1	101365008	101365068	6.07693	4.17848	+
chr1	101365077	101365120	3.19105	4.24001	+
chr1	101369538	101369597	2.45655	3.83685	+
chr1	101373233	101373283	2.15154	2.84227	+
chr1	101389509	101389608	4.22967	3.69249	+
chr1	101389645	101389872	3.3669	3.11443	+
chr1	101403949	101404002	3.03259	4.00323	+
chr1	101406032	101406180	2.24351	2.50323	+
chr1	101406503	101406564	2.08173	3.6642	+
chr1	101425726	101425783	2.45655	3.83685	+
chr1	101436549	101436603	2.45655	3.83685	+
chr1	101443659	101443730	2.67819	4.01761	+
chr1	101444723	101444770	2.068	3.63475	+
chr1	101504275	101504346	2.29824	3.03843	+
chr1	101517348	101517409	2.45655	3.83685	+
chr1	103492021	103492042	12.8648	6.00323	-
chr1	107703255	107703380	14.5719	6.20025	+
chr1	107703402	107703456	3.41117	4.25189	+
chr1	107708115	107708201	2.321	3.42723	+
chr1	107709058	107709135	2.45655	3.83685	+
chr1	107742778	107742870	2.30595	3.63475	+
chr1	107746610	107746649	2.321	3.42723	+
chr1	107764560	107764619	3.19105	4.24001	+
chr1	108136433	108136503	2.2983	2.92723	-
chr1	108685210	108685264	2.08173	3.6642	-
chr1	108731410	108731472	3.03494	4.0882	-
chr1	108733852	108733919	2.45655	3.83685	-
chr1	109243474	109243538	4.28996	3.29572	+
chr1	109334392	109334478	4.05764	2.95233	+
chr1	109428004	109428066	2.321	3.42723	+
chr1	109439803	109439886	3.41117	4.25189	+
chr1	109467521	109467575	2.71124	3.50323	-
chr1	109467596	109467712	4.94036	3.69594	-
chr1	109472727	109472880	2.77148	2.01199	+
chr1	109642953	109643029	5.84842	1.0166	+
chr1	109643053	109643062	4.06871	1.06068	+
chr1	109643099	109643117	2.91013	1.16443	+
chr1	109643122	109643175	10.4766	1.46872	+
chr1	109816576	109816769	10.7326	3.32494	+
chr1	109817351	109817401	2.17334	3.75458	+
chr1	109817755	109817799	2.45655	3.83685	+
chr1	110135030	110135094	3.53297	1.93515	+
chr1	110135995	110136080	2.89347	2.30712	+
chr1	110718767	110718779	3.28988	3.42181	+
chr1	111665263	111665308	6.55696	5.00323	-
chr1	111665397	111665461	5.82528	4.11572	-
chr1	111689436	111689458	2.9307	4.05924	+
chr1	111712077	111712155	3.41117	4.25189	+
chr1	111713491	111713534	3.30111	4.24595	+
chr1	111717402	111717448	2.17334	3.75458	+
chr1	111721746	111721790	2.01216	2.47428	+
chr1	111722309	111722405	4.86241	4.71971	+
chr1	111722640	111722671	2.068	3.63475	+
chr1	111724246	111724286	2.30595	3.63475	+
chr1	111724316	111724361	3.41117	4.25189	+
chr1	112182602	112182667	2.45655	3.83685	+
chr1	112242737	112242810	3.53197	4.29572	+
chr1	112243788	112243848	3.28988	3.42181	+
chr1	112244090	112244128	2.45655	3.83685	+
chr1	112945455	112945520	2.51443	3.0882	+
chr1	113169189	113169262	4.86241	4.71971	+
chr1	113169299	113169353	3.50552	3.47566	+
chr1	113174414	113174462	2.8238	4.03843	+
chr1	113175378	113175458	6.56488	5.0512	+
chr1	113179638	113179734	4.38668	3.79572	+
chr1	113199914	113200035	4.95798	2.92723	+
chr1	113200057	113200093	3.41117	4.25189	+
chr1	113200927	113200981	3.74304	3.57382	+
chr1	113201023	113201105	6.24105	4.1994	+
chr1	113201143	113201190	3.74304	3.57382	+
chr1	113201211	113201307	2.81741	2.61854	+
chr1	113204126	113204166	2.45655	3.83685	+
chr1	113229761	113229832	4.52501	4.53843	+
chr1	113230308	113230371	5.56714	4.90691	+
chr1	113455466	113455512	4.38574	4.57382	-
chr1	113455770	113455784	2.24734	2.65504	-
chr1	113457768	113457852	2.70156	3.36447	-
chr1	113457900	113457974	3.59125	3.16962	-
chr1	113458241	113458306	3.41117	4.25189	-
chr1	113479907	113479990	2.66423	3.71971	-
chr1	113503687	113503807	5.5292	2.88032	+
chr1	113507117	113507192	4.02603	4.42723	+
chr1	113508805	113508986	4.87396	3.18385	+
chr1	113508998	113509047	2.74041	2.60258	+
chr1	113570522	113570573	4.38574	4.57382	+
chr1	113570998	113571015	2.45655	3.83685	+
chr1	113571046	113571106	4.7752	4.50323	+
chr1	113571414	113571477	2.06384	2.25189	+
chr1	113617134	113617222	2.5457	2.95347	+
chr1	113626656	113626748	3.04468	4.13475	+
chr1	113634640	113634685	2.67819	4.01761	+
chr1	113634727	113634785	2.9307	4.05924	+
chr1	113634817	113634855	3.19105	4.24001	+
chr1	113634947	113635011	3.89654	4.42181	+
chr1	113998268	113998325	2.9307	4.05924	+
chr1	114030179	114030232	2.17334	3.75458	+
chr1	114053380	114053476	6.87354	5.15878	+
chr1	114244733	114244826	4.87844	4.71132	-
chr1	114244891	114244925	2.17334	3.75458	-
chr1	114485865	114485942	2.78799	3.92723	+
chr1	114507566	114507635	2.5453	3.84227	+
chr1	114508444	114508538	2.45655	3.83685	+
chr1	114517489	114517539	5.82827	5.01761	+
chr1	114517579	114517681	10.1506	3.49155	+
chr1	114520183	114520227	2.24734	2.65504	+
chr1	114944906	114944984	2.5453	3.84227	-
chr1	114945114	114945198	5.12174	3.98497	-
chr1	114991254	114991328	2.07284	2.90691	-
chr1	114996099	114996148	2.33416	3.79572	-
chr1	114998848	114998897	2.45655	3.83685	-
chr1	115050802	115050865	3.52665	4.13475	-
chr1	115282824	115283010	6.46117	4.91278	-
chr1	115284051	115284149	8.01728	4.49982	-
chr1	115285165	115285433	4.52633	2.90691	-
chr1	115297935	115297997	2.51691	3.13475	-
chr1	115298126	115298179	2.33416	3.79572	-
chr1	115312340	115312418	2.9307	4.05924	-
chr1	115312488	115312552	2.17334	3.75458	-
chr1	116216835	116216923	2.40671	3.05924	+
chr1	116581475	116581598	2.67527	2.33502	+
chr1	116582243	116582308	2.84406	3.25189	+
chr1	116582356	116582411	2.45655	3.83685	+
chr1	116915458	116915483	6.81272	4.78617	+
chr1	116947069	116947143	18.3107	1.41505	+
chr1	116947170	116947272	208.529	2.44841	+
chr1	116951017	116951098	2.45655	3.83685	-
chr1	117103969	117104078	9.25901	5.5902	-
chr1	117104133	117104163	2.17334	3.75458	-
chr1	117455420	117455553	5.78854	4.6642	+
chr1	117529882	117530010	11.7379	3.58498	+
chr1	117530209	117530235	2.24734	2.65504	+
chr1	117532527	117532577	2.67819	4.01761	+
chr1	117645314	117645491	15.6576	7.14268	+
chr1	118066333	118066393	2.18977	3.01761	+
chr1	118417929	118417965	2.45655	3.83685	-
chr1	118417980	118418057	3.66069	3.53843	-
chr1	118419205	118419255	2.45655	3.83685	-
chr1	119658816	119658876	3.2873	3.92723	-
chr1	120455974	120456038	2.17334	3.75458	-
chr1	120457385	120457434	2.17334	3.75458	-
chr1	120514663	120514703	2.17334	3.75458	-
chr1	120516636	120516711	2.54863	3.71971	-
chr1	120532918	120533062	2.27782	1.29066	-
chr1	120533140	120533241	11.3098	4.1413	-
chr1	142650806	142650905	6.139	5.03843	+
chr1	144852623	144852717	2.40671	3.05924	-
chr1	144926087	144926150	2.17334	3.75458	-
chr1	144926197	144926256	4.7752	4.50323	-
chr1	145283658	145283741	3.08535	1.63154	+
chr1	145527762	145527870	2.07538	2.84227	+
chr1	145528763	145528860	3.27954	4.1642	+
chr1	145528988	145529072	2.9307	4.05924	+
chr1	145530093	145530157	2.06572	3.53843	+
chr1	146396659	146396770	3.27954	4.1642	+
chr1	146758958	146759010	2.5453	3.84227	+
chr1	149816955	149816988	2.18977	3.01761	-
chr1	149817101	149817184	7.06669	5.07199	-
chr1	149817281	149817395	4.84974	3.88068	-
chr1	149817582	149817612	2.9307	4.05924	-
chr1	150058318	150058391	2.40671	3.05924	+
chr1	150060272	150060344	7.36189	5.25872	+
chr1	150087398	150087484	5.82827	5.01761	+
chr1	150087543	150087644	6.08375	5.02543	+
chr1	150117310	150117382	2.62248	3.84227	+
chr1	150237864	150237930	4.02152	2.7165	-
chr1	150238223	150238263	2.68403	2.84769	-
chr1	150548171	150548311	2.42945	2.04806	-
chr1	150548606	150548638	2.44177	2.42181	-
chr1	150548772	150548789	2.41072	2.66693	-
chr1	150549008	150549021	2.17334	3.75458	-
chr1	150551770	150551807	2.24734	2.65504	-
chr1	151023558	151023714	7.58164	3.90001	-
chr1	151024521	151024553	2.08512	2.92723	-
chr1	151025085	151025151	10.5125	4.2754	-
chr1	151025163	151025315	18.4932	4.48866	-
chr1	151173763	151173820	2.18977	3.01761	+
chr1	151177441	151177494	2.3245	2.43265	+
chr1	151188515	151188589	4.73686	2.7925	+
chr1	151189073	151189147	3.87163	3.16995	+
chr1	151189755	151189783	4.20239	3.71132	+
chr1	151189812	151189937	10.2841	4.77958	+
chr1	151191427	151191502	2.96263	2.91827	+
chr1	151193288	151193463	4.5476	3.36737	+
chr1	151227613	151227724	3.52665	4.13475	+
chr1	151282029	151282155	3.74304	3.57382	-
chr1	151411425	151411505	3.19105	4.24001	-
chr1	151585681	151585797	3.05966	3.63475	+
chr1	151625281	151625340	2.17334	3.75458	+
chr1	152005008	152005104	15.6964	3.06729	-
chr1	153507105	153507174	2.45456	2.79572	-
chr1	153533874	153533970	7.24593	3.6272	-
chr1	153533991	153534068	5.64557	2.00871	-
chr1	153536166	153536368	2.91041	1.16859	-
chr1	153537979	153538018	3.03736	1.98232	-
chr1	153579567	153579619	2.3245	2.43265	-
chr1	153579830	153579867	2.18977	3.01761	-
chr1	153587368	153587398	2.17334	3.75458	-
chr1	153588053	153588103	2.02655	2.11072	-
chr1	153611178	153611280	3.6034	3.27254	+
chr1	153613482	153613552	3.28737	4.21971	+
chr1	153614969	153615104	10.9729	5.246	+
chr1	153615470	153615511	6.56416	4.25189	+
chr1	153615549	153615637	8.62069	3.72305	+
chr1	153781640	153781717	2.41072	2.66693	-
chr1	153831226	153831344	2.00776	2.33055	-
chr1	153890344	153890435	2.30507	3.74595	-
chr1	153935063	153935137	3.19105	4.24001	-
chr1	154131438	154131482	2.9307	4.05924	-
chr1	154131531	154131614	5.12174	3.98497	-
chr1	154131641	154131704	3.89654	4.42181	-
chr1	154140335	154140402	2.15154	2.84227	-
chr1	154140542	154140613	2.52488	3.00323	-
chr1	154141705	154141762	2.07284	2.90691	-
chr1	154141867	154141972	2.77525	2.45347	-
chr1	154144912	154144975	2.82102	2.83685	-
chr1	154145072	154145169	4.19618	2.70895	-
chr1	154146855	154146911	2.17334	3.75458	-
chr1	154192923	154192984	2.18977	3.01761	-
chr1	154195039	154195128	2.5333	2.71075	+
chr1	154213197	154213334	3.03035	3.74595	+
chr1	154215300	154215383	2.41229	2.28065	+
chr1	154412327	154412374	2.17334	3.75458	+
chr1	154521587	154521650	2.67819	4.01761	-
chr1	154934943	154934973	2.67819	4.01761	-
chr1	154935461	154935543	3.61457	3.60258	-
chr1	154942892	154942926	2.18977	3.01761	-
chr1	155033714	155033796	8.47174	3.87172	+
chr1	155033819	155033861	3.33773	3.29572	+
chr1	155034251	155034310	2.85624	2.41102	+
chr1	155034330	155034364	4.60432	3.89208	+
chr1	155034385	155034443	4.3295	4.5882	+
chr1	155217343	155217428	4.60432	3.89208	-
chr1	155464299	155464390	5.45893	4.74595	-
chr1	155884077	155884164	9.18907	2.61601	-
chr1	155884182	155884232	5.82827	5.01761	-
chr1	156106004	156106051	2.24734	2.65504	+
chr1	156107906	156107996	2.29824	3.03843	+
chr1	156109254	156109293	4.96597	3.88068	+
chr1	156109539	156109642	2.71051	0.628958	+
chr1	156109673	156109737	2.39979	1.52576	+
chr1	156213461	156213569	4.05386	3.9356	-
chr1	156213643	156213710	3.41625	3.07924	-
chr1	156213727	156213804	2.0676	2.02222	-
chr1	156718789	156718861	2.55202	3.90691	-
chr1	156997279	156997346	2.67819	4.01761	-
chr1	157970482	157970569	3.63635	3.00323	+
chr1	157984610	157984656	2.9307	4.05924	+
chr1	157984702	157984800	4.28246	4.53843	+
chr1	157991278	157991425	4.99482	3.47428	+
chr1	157997805	157997901	3.79161	3.54979	+
chr1	157997924	157997983	4.54203	4.63475	+
chr1	157999093	157999194	2.01216	2.47428	+
chr1	159111396	159111438	2.37901	2.84227	-
chr1	159887963	159888007	3.02436	2.65695	-
chr1	159888239	159888293	2.84406	3.25189	-
chr1	159888354	159888476	12.0501	5.02543	-
chr1	159912579	159912648	2.14263	3.53843	-
chr1	159941053	159941078	4.43942	2.41827	+
chr1	160183354	160183460	4.9529	4.424	+
chr1	160184450	160184524	6.08972	4.19249	+
chr1	160184726	160184770	3.66979	3.12636	+
chr1	160184818	160184898	4.9108	3.15878	+
chr1	160184997	160185062	2.94413	2.74595	+
chr1	160222213	160222397	4.58345	4.30286	-
chr1	160222542	160222614	3.27954	4.1642	-
chr1	160298359	160298490	15.6576	5.12636	-
chr1	160298616	160298632	3.74304	3.57382	-
chr1	160298661	160298727	10.3833	3.07602	-
chr1	160298861	160298886	4.99482	3.47428	-
chr1	160298978	160299094	8.38114	4.49755	-
chr1	160299167	160299248	8.17732	4.07199	-
chr1	160299570	160299601	4.99482	3.47428	-
chr1	160299875	160299923	2.78196	2.53843	-
chr1	160299964	160300041	12.64	6.03088	-
chr1	160966953	160967045	2.3245	2.43265	-
chr1	161743511	161743611	2.98703	3.34227	+
chr1	161743802	161743852	2.9307	4.05924	+
chr1	161892916	161892997	2.45655	3.83685	+
chr1	161906458	161906562	4.38574	4.57382	+
chr1	161906583	161906643	2.5453	3.84227	+
chr1	162136957	162137112	3.77568	4.19249	+
chr1	162196145	162196242	2.79226	4.00323	+
chr1	162534388	162534466	3.41117	4.25189	+
chr1	162536696	162536754	2.9307	4.05924	+
chr1	162537227	162537272	3.04468	4.13475	+
chr1	162538147	162538202	2.08173	3.6642	+
chr1	162562606	162562936	59.3297	5.14985	+
chr1	162563136	162563166	9.66736	4.25189	+
chr1	162563594	162563631	2.18545	2.29572	+
chr1	162563775	162563821	4.80406	4.71971	+
chr1	162564286	162564320	3.30111	4.24595	+
chr1	162564333	162564361	4.23426	4.60258	+
chr1	162564857	162564992	4.0202	3.70957	+
chr1	163217843	163217908	2.45655	3.83685	-
chr1	163236876	163236962	2.9307	4.05924	-
chr1	163282428	163282484	2.45655	3.83685	-
chr1	164663891	164663997	3.89654	4.42181	+
chr1	164664079	164664130	2.9307	4.05924	+
chr1	164694726	164694785	2.068	3.63475	+
chr1	165603661	165603698	2.40671	3.05924	+
chr1	165807800	165807860	2.9307	4.05924	+
chr1	165807966	165808064	2.33522	2.10531	+
chr1	165813029	165813087	2.30595	3.63475	+
chr1	165813124	165813159	3.41117	4.25189	+
chr1	165813173	165813227	4.77587	4.5882	+
chr1	165813268	165813292	2.31495	3.79572	+
chr1	165813785	165813846	3.30111	4.24595	+
chr1	165813914	165813957	2.40671	3.05924	+
chr1	167190648	167190710	2.74429	2.82195	+
chr1	167191002	167191067	4.5476	3.36737	+
chr1	167191440	167191560	4.74756	4.28287	+
chr1	167191618	167191650	3.89654	4.42181	+
chr1	167191730	167191755	3.89654	4.42181	+
chr1	167191765	167191829	4.52825	4.34227	+
chr1	167212364	167212415	2.45655	3.83685	+
chr1	167218406	167218478	2.85016	4.00323	+
chr1	167218488	167218557	2.01216	2.47428	+
chr1	167240093	167240147	2.17334	3.75458	+
chr1	167243470	167243586	3.61581	3.10753	+
chr1	167387175	167387266	4.20239	3.71132	+
chr1	167387340	167387412	2.80445	4.03843	+
chr1	167387554	167387683	4.00015	4.0882	+
chr1	167393971	167394055	4.23426	4.60258	+
chr1	167394444	167394479	3.08337	4.13475	+
chr1	167394861	167394979	4.66818	3.54166	+
chr1	167395237	167395301	2.74924	3.24595	+
chr1	167705301	167705431	7.88207	5.33935	+
chr1	167707580	167707687	4.38574	4.57382	+
chr1	167742620	167742681	2.79752	3.21971	+
chr1	167742720	167742787	3.11219	4.0882	+
chr1	167743602	167743692	13.1029	4.73298	+
chr1	167743723	167743794	15.6576	6.16239	+
chr1	167743807	167744113	15.6576	5.95133	+
chr1	167744138	167744188	13.4624	6.11572	+
chr1	167751240	167751392	2.90425	2.94777	+
chr1	167754601	167754671	2.36291	3.74595	+
chr1	167755388	167755445	2.78799	3.92723	+
chr1	167755519	167755615	2.01088	2.92723	+
chr1	167920300	167920351	2.45655	3.83685	+
chr1	167965740	167965782	2.9307	4.05924	+
chr1	167976301	167976344	4.36936	3.74595	+
chr1	167976373	167976410	5.2807	4.5882	+
chr1	167976563	167976629	8.63707	5.42723	+
chr1	167976701	167976755	6.30613	4.1642	+
chr1	167976800	167976887	8.67347	3.83377	+
chr1	167976920	167976980	6.80712	4.97566	+
chr1	167977051	167977104	5.59627	4.0882	+
chr1	167977689	167977765	11.0469	5.81645	+
chr1	167991288	167991369	5.34582	3.25189	+
chr1	167992009	167992163	13.139	6.03843	+
chr1	167995142	167995210	2.54863	3.71971	+
chr1	167998052	167998073	3.41117	4.25189	+
chr1	167998081	167998122	8.89551	5.49982	+
chr1	167998264	167998303	6.56416	4.25189	+
chr1	167998462	167998570	13.9128	6.20823	+
chr1	167998608	167998780	8.77724	5.45145	+
chr1	168010912	168011007	4.87844	4.71132	+
chr1	168020218	168020299	3.61911	3.13475	+
chr1	168023357	168023495	2.08982	2.58126	+
chr1	168044879	168044936	2.19726	2.50323	+
chr1	168201770	168201811	2.29824	3.03843	+
chr1	168201875	168201966	10.7004	5.71971	+
chr1	168202074	168202117	3.89654	4.42181	+
chr1	168202725	168202945	10.0173	5.20558	+
chr1	169101353	169101432	17.2064	2.70895	+
chr1	169101463	169101559	29.3872	2.33146	+
chr1	169328156	169328243	4.87844	4.71132	-
chr1	169335238	169335314	3.03494	4.0882	-
chr1	171471277	171471327	2.01216	2.47428	+
chr1	171476094	171476159	4.30769	3.19249	+
chr1	171476225	171476277	2.8315	2.57382	+
chr1	171476869	171476969	4.36875	4.00323	+
chr1	171477854	171477923	2.79328	3.63475	+
chr1	171537708	171537816	5.08081	2.99598	+
chr1	171545648	171545717	2.18977	3.01761	+
chr1	171558488	171558600	2.9664	3.29572	+
chr1	171562554	171562598	2.67819	4.01761	+
chr1	172062326	172062453	5.78685	4.75872	+
chr1	172376903	172376976	4.38574	4.57382	+
chr1	172534542	172534596	2.17334	3.75458	+
chr1	173404490	173404573	2.45655	3.83685	-
chr1	173450974	173451021	2.45655	3.83685	+
chr1	173453652	173453714	2.45655	3.83685	+
chr1	173686263	173686339	4.52501	4.53843	+
chr1	173686393	173686491	3.53633	3.98497	+
chr1	173686593	173686646	2.17334	3.75458	+
chr1	173833458	173833481	6.87354	5.15878	-
chr1	173833504	173833578	7.03525	0.306052	-
chr1	173833989	173834041	10.917	0.667145	-
chr1	173834486	173834554	3.12128	-0.0266413	-
chr1	173834761	173834821	9.3098	0.0397079	-
chr1	173835444	173835487	3.899	0.87497	-
chr1	173835790	173835828	6.00005	0.521186	-
chr1	173836014	173836065	29.9436	2.03722	-
chr1	173836816	173836858	3.97456	-0.276639	-
chr1	173906276	173906335	4.10124	3.27951	-
chr1	173970076	173970214	4.1064	3.75458	-
chr1	173970941	173971014	2.9307	4.05924	-
chr1	173974081	173974159	2.24734	2.65504	-
chr1	173976104	173976207	3.5914	4.1738	-
chr1	173976861	173976943	4.07534	2.98497	-
chr1	174239177	174239229	2.17334	3.75458	+
chr1	174239341	174239388	2.67819	4.01761	+
chr1	174240973	174241018	2.67819	4.01761	+
chr1	174241019	174241093	3.89924	3.53843	+
chr1	174241211	174241295	2.30507	3.74595	+
chr1	174287947	174288018	3.41117	4.25189	+
chr1	174361002	174361077	4.80406	4.71971	+
chr1	174364217	174364315	3.41117	4.25189	+
chr1	174385614	174385734	3.30111	4.24595	+
chr1	174385816	174385888	4.38574	4.57382	+
chr1	174386993	174387067	3.01265	3.13475	+
chr1	174387136	174387224	2.78799	3.92723	+
chr1	174417629	174417688	2.56737	3.92723	+
chr1	174427833	174427965	8.03088	3.57199	+
chr1	174427973	174428060	4.24472	2.63475	+
chr1	174436669	174436741	3.64282	3.5882	+
chr1	174436915	174436961	3.41117	4.25189	+
chr1	174440121	174440191	2.32316	3.42723	+
chr1	174448445	174448534	5.82827	5.01761	+
chr1	174448603	174448646	2.9307	4.05924	+
chr1	174448805	174448848	2.9307	4.05924	+
chr1	174450174	174450245	2.04308	3.24595	+
chr1	174450563	174450613	2.82102	2.83685	+
chr1	174479911	174479988	2.9307	4.05924	+
chr1	174534534	174534595	2.45655	3.83685	+
chr1	174797396	174797458	2.9307	4.05924	+
chr1	175930966	175931035	3.19608	3.36447	-
chr1	175931065	175931193	7.08634	4.38068	-
chr1	175938943	175939070	9.79219	4.59418	-
chr1	175939348	175939410	5.2807	4.5882	-
chr1	175939442	175939464	2.17334	3.75458	-
chr1	175939542	175939570	3.27954	4.1642	-
chr1	175940061	175940158	3.19264	4.1738	-
chr1	175943581	175943699	4.76246	4.75458	-
chr1	175944354	175944521	5.90791	3.65329	-
chr1	175945105	175945183	2.40671	3.05924	-
chr1	175949339	175949472	3.18786	3.73295	-
chr1	175951659	175951720	5.34582	3.25189	-
chr1	175952066	175952116	3.19105	4.24001	-
chr1	175952155	175952213	2.84406	3.25189	-
chr1	175999713	175999757	2.40671	3.05924	-
chr1	175999791	175999915	3.31654	3.61443	-
chr1	176016503	176016581	3.66069	3.53843	-
chr1	176019362	176019440	4.87844	4.71132	-
chr1	176019485	176019611	4.00488	3.55023	-
chr1	176032723	176032774	2.40671	3.05924	-
chr1	176032821	176032888	3.28988	3.42181	-
chr1	176034283	176034379	4.23426	4.60258	-
chr1	176076598	176076670	2.45655	3.83685	-
chr1	176106194	176106242	2.08173	3.6642	-
chr1	178064480	178064573	3.74304	3.57382	+
chr1	178070471	178070523	2.75455	3.07199	+
chr1	178070541	178070571	2.45655	3.83685	+
chr1	178071187	178071232	2.29824	3.03843	+
chr1	178071285	178071410	6.54512	3.83289	+
chr1	178072253	178072345	8.01728	4.49982	+
chr1	178072416	178072486	6.37182	5.05924	+
chr1	178072850	178072877	2.17334	3.75458	+
chr1	178073364	178073388	2.40671	3.05924	+
chr1	178073533	178073576	2.33416	3.79572	+
chr1	178073587	178073612	2.45655	3.83685	+
chr1	178073686	178073743	2.79323	3.79572	+
chr1	178073840	178073884	2.5453	3.84227	+
chr1	178076732	178076807	4.87844	4.71132	+
chr1	178079310	178079397	9.51312	5.6272	+
chr1	178085278	178085350	3.19608	3.36447	+
chr1	178099844	178099972	3.01454	2.75279	+
chr1	178100702	178100763	2.2983	2.92723	+
chr1	178100809	178100861	2.01216	2.47428	+
chr1	178113216	178113269	3.54379	4.33091	+
chr1	178113429	178113485	5.90379	3.66693	+
chr1	178118975	178119070	3.74304	3.57382	+
chr1	178134217	178134297	2.01216	2.47428	+
chr1	178136764	178136865	4.04796	4.50323	+
chr1	178136982	178137001	2.9307	4.05924	+
chr1	178137047	178137164	6.62931	3.71075	+
chr1	178143336	178143443	2.55653	2.92723	+
chr1	178144184	178144208	3.89654	4.42181	+
chr1	178144266	178144308	3.19105	4.24001	+
chr1	178144391	178144520	9.61944	3.83472	+
chr1	178149458	178149500	3.28988	3.42181	+
chr1	178150105	178150182	7.04624	4.33935	+
chr1	178150313	178150465	10.3179	4.02543	+
chr1	178155747	178155811	3.41117	4.25189	+
chr1	178157066	178157125	2.79323	3.79572	+
chr1	178157246	178157358	4.0654	4.5122	+
chr1	178175661	178175716	3.89654	4.42181	+
chr1	178196602	178196663	2.84406	3.25189	+
chr1	178200368	178200458	3.41117	4.25189	+
chr1	178334326	178334427	2.33416	3.79572	+
chr1	178425387	178425441	4.10563	3.25189	+
chr1	178425511	178425634	15.6576	6.3631	+
chr1	178830324	178830414	2.45655	3.83685	+
chr1	178838889	178838936	2.45655	3.83685	+
chr1	178838988	178839042	2.07284	2.90691	+
chr1	178839619	178839701	3.30111	4.24595	+
chr1	179001214	179001254	2.17334	3.75458	+
chr1	179002085	179002178	4.05509	2.886	+
chr1	179138118	179138209	3.90848	3.65695	-
chr1	179947672	179947719	2.5453	3.84227	+
chr1	179972495	179972577	3.43652	3.50323	+
chr1	180124062	180124119	2.18977	3.01761	+
chr1	180166786	180166934	5.0852	4.21971	+
chr1	180167700	180167909	5.48626	3.79572	+
chr1	180240524	180240575	2.33416	3.79572	-
chr1	180241054	180241139	5.81851	4.0882	-
chr1	180241371	180241408	2.06384	2.25189	-
chr1	180309185	180309271	4.87844	4.71132	-
chr1	180313338	180313391	2.17334	3.75458	-
chr1	180315358	180315486	3.92472	3.6642	-
chr1	180317528	180317694	9.91126	5.52543	-
chr1	180317735	180317790	4.20239	3.71132	-
chr1	180335478	180335533	2.45655	3.83685	-
chr1	180339329	180339389	2.54863	3.71971	-
chr1	180341636	180341709	2.45655	3.83685	-
chr1	180347588	180347675	2.8017	2.82195	-
chr1	180353551	180353640	3.41117	4.25189	-
chr1	180354208	180354278	4.66696	3.83685	-
chr1	180365270	180365333	3.39483	3.04979	-
chr1	180366386	180366434	3.41117	4.25189	-
chr1	180428654	180428741	2.82102	2.83685	-
chr1	180623321	180623396	2.45655	3.83685	+
chr1	180941607	180941695	5.87192	4.95233	-
chr1	180963780	180963849	2.55202	3.90691	-
chr1	182181591	182181634	2.88451	3.92723	-
chr1	182352439	182352516	2.24116	1.94723	-
chr1	182816295	182816360	2.54863	3.71971	+
chr1	182818628	182818695	2.45655	3.83685	+
chr1	182819184	182819263	2.31495	3.79572	+
chr1	183013144	183013206	2.65443	3.24001	+
chr1	183015726	183015773	2.45655	3.83685	+
chr1	183015841	183015922	2.2701	2.42723	+
chr1	183021298	183021452	3.89514	3.59617	+
chr1	183023260	183023391	4.86241	4.71971	+
chr1	183113343	183113408	2.15602	2.54979	+
chr1	183114593	183114639	2.08173	3.6642	+
chr1	183155397	183155567	5.5008	2.86393	+
chr1	183171812	183171967	5.48132	3.30267	+
chr1	183188693	183188799	6.78445	2.33929	+
chr1	183189983	183190049	2.68403	2.84769	+
chr1	183191866	183191897	2.45655	3.83685	+
chr1	183192046	183192100	2.65443	3.24001	+
chr1	183192366	183192410	2.40671	3.05924	+
chr1	183199134	183199321	3.63664	1.59504	+
chr1	183201003	183201093	6.82186	2.31413	+
chr1	183450000	183450074	9.175	5.53843	+
chr1	183450105	183450210	8.01728	4.49982	+
chr1	183450424	183450490	3.19105	4.24001	+
chr1	183465504	183465597	2.36215	3.80943	+
chr1	183465616	183465692	2.53057	3.14963	+
chr1	183474045	183474125	2.55202	3.90691	+
chr1	183474873	183474968	4.84974	3.88068	+
chr1	183475015	183475100	3.22931	3.42723	+
chr1	183476596	183476728	4.74818	4.3017	+
chr1	183482176	183482239	2.18977	3.01761	+
chr1	183516099	183516174	2.85016	4.00323	+
chr1	183599844	183599991	3.11549	3.35345	-
chr1	183600145	183600226	2.36291	3.74595	-
chr1	183602532	183602653	9.70077	4.75872	-
chr1	183602907	183602943	2.9307	4.05924	-
chr1	184024957	184025060	5.54362	4.84227	+
chr1	184025160	184025236	5.2807	4.5882	+
chr1	184025728	184025777	4.5741	4.6642	+
chr1	184025795	184025823	4.87844	4.71132	+
chr1	184025868	184025907	3.71019	4.43265	+
chr1	184025991	184026016	2.17334	3.75458	+
chr1	184027419	184027535	2.78799	3.92723	+
chr1	184715335	184715390	2.45655	3.83685	-
chr1	184716561	184716628	2.84406	3.25189	-
chr1	184763995	184764064	2.24116	1.94723	-
chr1	185047506	185047563	2.17334	3.75458	+
chr1	185064472	185064558	2.08173	3.6642	+
chr1	185266057	185266148	7.879	4.04224	-
chr1	185266407	185266473	8.66909	5.01442	-
chr1	185267059	185267134	2.08871	1.13823	-
chr1	185283753	185283794	3.41117	4.25189	-
chr1	185283994	185284044	2.12645	2.09989	-
chr1	185284497	185284559	2.24116	1.94723	-
chr1	186379018	186379098	2.12975	2.56466	+
chr1	186388514	186388618	2.19359	2.94805	+
chr1	186643334	186643413	2.55202	3.90691	-
chr1	192985250	192985378	3.09674	2.13309	-
chr1	193014179	193014292	4.66696	3.83685	-
chr1	193016277	193016516	5.85863	3.57124	-
chr1	193054657	193054778	3.1477	3.13475	+
chr1	193060583	193060696	4.99482	3.47428	+
chr1	193122465	193122494	3.41117	4.25189	+
chr1	193122539	193122630	5.93617	3.45668	+
chr1	193129781	193129840	3.37629	4.1642	+
chr1	193136705	193136780	3.04468	4.13475	+
chr1	193156405	193156476	2.82102	2.83685	+
chr1	193156483	193156534	2.18977	3.01761	+
chr1	193156562	193156643	3.21062	3.79572	+
chr1	193215911	193215976	2.85016	4.00323	+
chr1	193215999	193216095	7.3931	5.28968	+
chr1	193222723	193222821	5.07782	3.48702	+
chr1	197086011	197086062	2.15154	2.84227	-
chr1	197086134	197086218	2.41072	2.66693	-
chr1	197476228	197476280	2.62248	3.84227	-
chr1	197479216	197479289	2.9307	4.05924	-
chr1	197590073	197590157	2.9307	4.05924	-
chr1	197613534	197613575	2.67819	4.01761	-
chr1	198143543	198143678	3.1845	2.18131	+
chr1	198149319	198149430	2.96851	2.13475	+
chr1	198149642	198149682	2.17334	3.75458	+
chr1	198160172	198160233	2.19726	2.50323	+
chr1	198235109	198235205	6.96844	4.1272	+
chr1	198251155	198251195	2.9307	4.05924	+
chr1	198251196	198251240	2.67819	4.01761	+
chr1	198251611	198251689	6.09358	4.44211	+
chr1	198251703	198251782	7.35552	4.71971	+
chr1	198255621	198255730	2.12301	3.29572	+
chr1	198798605	198798617	3.89654	4.42181	-
chr1	198848183	198848269	9.18942	5.5575	-
chr1	198848422	198848563	10.9705	5.20833	-
chr1	198849175	198849231	2.45655	3.83685	-
chr1	198849269	198849329	4.54203	4.63475	-
chr1	198849391	198849428	2.45655	3.83685	-
chr1	198850637	198850668	2.45655	3.83685	-
chr1	198853515	198853648	6.2389	3.84227	-
chr1	198853748	198853774	3.41117	4.25189	-
chr1	198854474	198854520	2.01216	2.47428	-
chr1	198854607	198854702	15.5711	5.386	-
chr1	198859705	198859755	3.41117	4.25189	-
chr1	198860159	198860199	2.67819	4.01761	-
chr1	200378841	200378852	21.8065	2.21958	-
chr1	200379072	200379106	18.5749	2.2071	-
chr1	200588793	200588918	6.65835	5.14594	-
chr1	200588955	200589010	2.17334	3.75458	-
chr1	200718710	200718814	3.61457	3.60258	+
chr1	200721507	200721603	3.74304	3.57382	+
chr1	200772074	200772150	2.45655	3.83685	+
chr1	200781235	200781312	2.40671	3.05924	+
chr1	200819489	200819523	2.82102	2.83685	+
chr1	200819684	200819762	4.64078	2.80527	+
chr1	201299347	201299447	2.8346	1.06805	+
chr1	201299470	201299537	2.49933	0.938593	+
chr1	201603167	201603265	2.30507	3.74595	+
chr1	201709593	201709657	2.75114	2.11988	+
chr1	201709728	201709759	3.28988	3.42181	+
chr1	201710039	201710092	4.23426	4.60258	+
chr1	201711937	201712158	22.8445	4.582	+
chr1	201712287	201712309	8.38806	5.42181	+
chr1	201712505	201712532	4.63573	2.57199	+
chr1	201712797	201712823	2.82102	2.83685	+
chr1	201719489	201719551	3.60695	2.89208	+
chr1	201732833	201732937	4.66696	3.83685	+
chr1	201764565	201764652	4.29431	4.57199	+
chr1	201764675	201764824	8.42426	5.45668	+
chr1	201765760	201765827	4.59525	4.65695	+
chr1	201767289	201767338	2.18977	3.01761	+
chr1	201772908	201773005	2.01216	2.47428	+
chr1	201773735	201773811	3.41117	4.25189	+
chr1	201961096	201961146	2.79226	4.00323	+
chr1	201961163	201961222	2.9664	3.29572	+
chr1	202103273	202103351	2.01216	2.47428	-
chr1	202319067	202319118	2.068	3.63475	+
chr1	202364843	202364916	3.41117	4.25189	+
chr1	202433145	202433189	2.45655	3.83685	+
chr1	202433213	202433264	2.45655	3.83685	+
chr1	202884313	202884383	2.9307	4.05924	-
chr1	202921259	202921329	4.31	4.5882	-
chr1	202921366	202921402	2.17334	3.75458	-
chr1	203044935	203045010	2.10648	3.63475	+
chr1	203045063	203045123	3.89654	4.42181	+
chr1	203045335	203045407	4.84974	3.88068	+
chr1	204071659	204071703	2.67819	4.01761	+
chr1	204502247	204502362	3.89654	4.42181	+
chr1	204521852	204521928	2.068	3.63475	+
chr1	204531564	204531610	35.8076	3.21855	-
chr1	205682776	205682797	2.17334	3.75458	-
chr1	205683340	205683473	5.98875	2.61443	-
chr1	205684613	205684658	2.3245	2.43265	-
chr1	205684799	205684834	2.97216	3.33091	-
chr1	205684846	205684849	2.40671	3.05924	-
chr1	205684904	205684927	5.87192	4.95233	-
chr1	205685045	205685073	3.71019	4.43265	-
chr1	205685284	205685423	10.3979	3.402	-
chr1	205686730	205686783	2.24116	1.94723	-
chr1	206628450	206628527	3.30111	4.24595	+
chr1	206823422	206823550	4.52501	4.53843	+
chr1	206877590	206877614	3.71019	4.43265	+
chr1	207201351	207201500	6.51343	3.00323	-
chr1	207218914	207218970	2.51443	3.0882	-
chr1	207219034	207219157	5.53313	4.71971	-
chr1	207219189	207219222	2.9307	4.05924	-
chr1	207220991	207221087	4.27649	4.29572	-
chr1	207221229	207221295	3.89654	4.42181	-
chr1	207513444	207513495	2.45655	3.83685	+
chr1	207959054	207959084	2.9307	4.05924	+
chr1	207959114	207959244	14.8406	6.34368	+
chr1	207962346	207962411	8.01728	4.49982	+
chr1	207962491	207962583	6.6724	2.76815	+
chr1	208251837	208251947	10.0639	4.33091	-
chr1	208291794	208291891	2.88636	2.26849	-
chr1	208293648	208293711	2.45655	3.83685	-
chr1	208350717	208350861	2.89831	2.85345	-
chr1	208365164	208365245	2.9307	4.05924	-
chr1	208393470	208393536	3.80336	4.42723	-
chr1	208393572	208393608	2.45655	3.83685	-
chr1	208395235	208395322	4.10329	2.77424	-
chr1	208397000	208397151	15.6576	5.03628	-
chr1	208397767	208397869	15.1172	6.40691	-
chr1	208398016	208398064	4.23426	4.60258	-
chr1	208398504	208398571	2.12492	1.90397	-
chr1	208404374	208404453	3.41117	4.25189	-
chr1	208413172	208413272	6.58141	3.95668	-
chr1	208413344	208413384	2.52488	3.00323	-
chr1	208413630	208413672	2.41072	2.66693	-
chr1	208414437	208414487	2.07538	2.84227	-
chr1	208415253	208415462	10.0601	4.4142	-
chr1	209602221	209602406	12.5317	3.15766	+
chr1	209790772	209790861	2.89347	2.30712	-
chr1	209801298	209801410	5.30415	2.66995	-
chr1	209810772	209810915	10.7068	3.44047	-
chr1	209810971	209811063	10.5785	4.30369	-
chr1	209819018	209819073	2.43983	2.12636	-
chr1	209819938	209819983	2.9307	4.05924	-
chr1	209820320	209820350	2.9307	4.05924	-
chr1	209820703	209820768	4.06361	2.50323	-
chr1	209821906	209821960	3.37805	2.26463	-
chr1	209822107	209822132	2.17334	3.75458	-
chr1	209823366	209823465	2.0957	1.89113	-
chr1	209855052	209855114	5.87192	4.95233	-
chr1	209855259	209855352	4.28246	4.53843	-
chr1	209857687	209857734	2.08173	3.6642	-
chr1	209857768	209857801	2.06572	3.53843	-
chr1	209857856	209857902	3.03259	4.00323	-
chr1	209891425	209891543	2.70065	3.91285	-
chr1	209955777	209955828	2.3245	2.43265	-
chr1	209959111	209959245	2.25233	1.32903	-
chr1	209961614	209961685	2.41072	2.66693	-
chr1	209968955	209969084	3.58833	2.03153	-
chr1	210014672	210014725	4.76246	4.75458	+
chr1	210183106	210183181	3.19105	4.24001	+
chr1	210192773	210192849	3.71019	4.43265	+
chr1	210192980	210193082	4.20239	3.71132	+
chr1	210277925	210277983	2.67819	4.01761	+
chr1	210277992	210278024	2.45655	3.83685	+
chr1	211436856	211436932	3.74304	3.57382	+
chr1	211438175	211438255	2.33416	3.79572	+
chr1	211453152	211453222	4.03714	4.0882	+
chr1	211474908	211474939	2.17334	3.75458	+
chr1	211474983	211475028	2.17334	3.75458	+
chr1	211475039	211475074	2.9307	4.05924	+
chr1	211475199	211475222	2.17334	3.75458	+
chr1	211475497	211475599	2.18238	2.33091	+
chr1	211476433	211476466	2.08173	3.6642	+
chr1	211476506	211476621	8.17015	5.41968	+
chr1	211972125	211972253	6.55508	4.23295	-
chr1	211972597	211972682	3.71019	4.43265	-
chr1	211984569	211984611	3.41117	4.25189	-
chr1	211984632	211984685	2.30595	3.63475	-
chr1	211985402	211985468	2.14096	3.13475	-
chr1	211985503	211985557	2.86233	2.38939	-
chr1	211985689	211985736	2.5453	3.84227	-
chr1	211987631	211987673	2.17334	3.75458	-
chr1	212125190	212125250	2.08173	3.6642	-
chr1	212464387	212464433	2.75455	3.07199	+
chr1	212464978	212465048	4.20239	3.71132	+
chr1	212510575	212510627	2.45655	3.83685	+
chr1	212930484	212930562	3.27954	4.1642	-
chr1	212930697	212930768	3.03958	3.86447	-
chr1	212947379	212947468	2.36291	3.74595	-
chr1	213037412	213037478	5.60107	4.92723	+
chr1	213346908	213346989	2.30507	3.74595	+
chr1	213348480	213348574	2.82102	2.83685	+
chr1	214607810	214607845	2.45655	3.83685	-
chr1	214607865	214607925	2.14263	3.53843	-
chr1	214650075	214650149	2.9307	4.05924	-
chr1	214663214	214663386	3.69857	2.84227	-
chr1	214699557	214699622	3.64092	2.83685	-
chr1	214700043	214700169	2.77292	1.87896	-
chr1	214714388	214714441	2.17334	3.75458	-
chr1	214714559	214714590	3.41117	4.25189	-
chr1	214714772	214714845	5.44733	3.57382	-
chr1	214715363	214715402	2.96445	2.05924	-
chr1	214715808	214715907	10.4718	5.69939	-
chr1	214715959	214715982	2.67819	4.01761	-
chr1	214716008	214716060	5.78956	4.83091	-
chr1	214837398	214837468	3.13001	3.43265	+
chr1	215785959	215786033	3.41117	4.25189	+
chr1	215788124	215788178	2.9307	4.05924	+
chr1	215788284	215788370	3.52538	4.30457	+
chr1	217669240	217669383	6.36847	5.09617	-
chr1	217741942	217741993	2.67819	4.01761	-
chr1	217742081	217742125	2.45655	3.83685	-
chr1	217744194	217744261	2.45655	3.83685	-
chr1	217744675	217744752	4.79106	4.69249	-
chr1	217750808	217750891	2.98404	3.71971	-
chr1	217754500	217754555	2.06384	2.25189	-
chr1	217754559	217754604	2.9664	3.29572	-
chr1	217757134	217757185	2.45655	3.83685	-
chr1	217757230	217757262	2.17334	3.75458	-
chr1	217758245	217758379	4.06943	3.26849	-
chr1	217764292	217764324	2.068	3.63475	-
chr1	217764355	217764423	3.74304	3.57382	-
chr1	217764718	217764743	2.17334	3.75458	-
chr1	217764809	217764820	2.17334	3.75458	-
chr1	217768285	217768343	3.04468	4.13475	-
chr1	217768430	217768517	6.05816	4.97096	-
chr1	217769800	217769891	2.40671	3.05924	-
chr1	217775975	217776016	2.08173	3.6642	-
chr1	217776219	217776299	5.60871	4.05924	-
chr1	217776334	217776408	4.87844	4.71132	-
chr1	217780859	217780972	4.08681	4.50323	-
chr1	218617083	218617174	3.13001	3.43265	+
chr1	219352816	219352892	4.53149	4.59617	+
chr1	219358769	219358832	3.11219	4.0882	+
chr1	219360065	219360098	2.67819	4.01761	+
chr1	219360207	219360276	2.09776	3.29572	+
chr1	219362406	219362480	5.41107	2.71971	+
chr1	219363343	219363439	8.51167	3.06374	+
chr1	219367280	219367360	2.84406	3.25189	+
chr1	219368538	219368633	2.9307	4.05924	+
chr1	220294744	220294815	2.34517	3.24595	+
chr1	220338621	220338686	3.52589	4.23295	-
chr1	220424440	220424488	2.06572	3.53843	-
chr1	220707284	220707327	2.9307	4.05924	+
chr1	220707767	220707839	7.616	5.29572	+
chr1	221899684	221899852	8.58016	5.44181	-
chr1	221899870	221899925	2.4911	2.16831	-
chr1	221900320	221900379	5.10763	4.01761	-
chr1	222908040	222908168	3.89654	4.42181	+
chr1	222908376	222908441	3.19105	4.24001	+
chr1	223931050	223931098	2.17334	3.75458	+
chr1	223937815	223937860	2.79257	3.64963	+
chr1	223937881	223937942	2.12975	2.56466	+
chr1	223938079	223938198	3.84733	3.11443	+
chr1	224452293	224452337	2.45655	3.83685	-
chr1	224482516	224482590	2.08173	3.6642	-
chr1	224581019	224581094	5.54159	4.50323	-
chr1	224581145	224581207	2.18977	3.01761	-
chr1	224590106	224590170	3.27894	4.07199	-
chr1	224590210	224590371	6.80712	4.97566	-
chr1	224590585	224590627	2.67819	4.01761	-
chr1	224591687	224591753	2.26175	3.34227	-
chr1	224596696	224596791	2.068	3.63475	-
chr1	225212347	225212418	3.27954	4.1642	+
chr1	225589507	225589581	5.10763	4.01761	-
chr1	225690742	225690846	3.73496	3.69249	-
chr1	225705700	225705761	2.56737	3.92723	-
chr1	225705793	225705829	2.30507	3.74595	-
chr1	225705888	225705960	5.13585	3.95233	-
chr1	225830071	225830158	3.254	3.03843	-
chr1	225978065	225978121	2.65443	3.24001	+
chr1	226172820	226172931	2.9664	3.29572	-
chr1	226736632	226736676	4.05834	3.30712	+
chr1	227105112	227105144	2.17334	3.75458	+
chr1	227164104	227164168	2.67819	4.01761	+
chr1	227200505	227200616	4.02603	4.42723	-
chr1	227243219	227243264	3.41117	4.25189	-
chr1	227246381	227246447	10.3366	4.83091	-
chr1	227246520	227246578	3.42836	3.42723	-
chr1	227246796	227246851	4.87844	4.71132	-
chr1	227251592	227251661	2.65443	3.24001	-
chr1	227255639	227255698	4.38574	4.57382	-
chr1	227255924	227255989	2.9307	4.05924	-
chr1	227492682	227492767	2.82102	2.83685	-
chr1	227493905	227493984	4.83985	4.73295	-
chr1	227494180	227494261	6.31912	4.21971	-
chr1	227955101	227955151	3.19105	4.24001	+
chr1	227955206	227955229	2.17334	3.75458	+
chr1	227955267	227955416	4.40151	2.57694	+
chr1	227955452	227955563	10.7181	5.82497	+
chr1	228290469	228290522	2.18977	3.01761	-
chr1	230203088	230203165	2.37725	2.40691	+
chr1	230208099	230208164	2.85016	4.00323	+
chr1	230227615	230227671	2.67819	4.01761	+
chr1	230227715	230227851	7.35552	4.71971	+
chr1	230265917	230266042	3.52665	4.13475	+
chr1	230282416	230282528	2.65731	2.21281	+
chr1	230291818	230291867	2.17334	3.75458	+
chr1	230355283	230355365	4.64791	4.59617	+
chr1	230380522	230380581	3.41117	4.25189	+
chr1	230380690	230380796	4.74668	4.29572	+
chr1	230380899	230380941	2.45655	3.83685	+
chr1	230388158	230388196	3.41117	4.25189	+
chr1	230416198	230416260	2.18977	3.01761	+
chr1	230416427	230416493	2.01216	2.47428	+
chr1	231396682	231396717	2.45655	3.83685	+
chr1	233123738	233123754	5.29397	4.89208	-
chr1	233222674	233222746	3.7736	4.29572	-
chr1	233257362	233257424	2.45655	3.83685	-
chr1	233269699	233269805	2.79323	3.79572	-
chr1	233294208	233294284	2.068	3.63475	-
chr1	233351329	233351424	2.30595	3.63475	-
chr1	233352093	233352204	3.70144	4.35524	-
chr1	233394281	233394297	4.60432	3.89208	-
chr1	233471173	233471237	2.45655	3.83685	+
chr1	233472362	233472447	2.11804	2.54979	+
chr1	234049515	234049587	4.7752	4.50323	+
chr1	234049848	234049949	4.11233	4.47566	+
chr1	234050047	234050097	3.74304	3.57382	+
chr1	234063187	234063247	2.9307	4.05924	+
chr1	234063308	234063423	6.37182	5.05924	+
chr1	234064083	234064183	3.58248	4.33091	+
chr1	234076906	234076955	2.17334	3.75458	+
chr1	234077005	234077062	3.40764	3.69249	+
chr1	234077124	234077235	6.30674	4.60405	+
chr1	234077494	234077559	3.61457	3.60258	+
chr1	234078489	234078620	4.52501	4.53843	+
chr1	234087731	234087787	2.45655	3.83685	+
chr1	234117046	234117126	5.31719	4.85345	+
chr1	234152596	234152684	6.62515	3.80369	+
chr1	234152728	234152825	3.27954	4.1642	+
chr1	234156240	234156328	2.67819	4.01761	+
chr1	234182519	234182581	3.89654	4.42181	+
chr1	234228891	234228991	11.8224	5.98497	+
chr1	234229059	234229085	2.45655	3.83685	+
chr1	234235699	234235797	4.04796	4.50323	+
chr1	234267741	234267847	2.45655	3.83685	+
chr1	234277542	234277622	3.89654	4.42181	+
chr1	234281679	234281736	2.9307	4.05924	+
chr1	234281927	234282032	3.08337	4.13475	+
chr1	234293450	234293503	2.45655	3.83685	+
chr1	234293956	234294052	4.28246	4.53843	+
chr1	234294942	234294995	2.08173	3.6642	+
chr1	234742523	234742628	6.3913	3.19819	-
chr1	234798732	234798898	11.0149	5.78968	+
chr1	234798957	234798990	2.45655	3.83685	+
chr1	234799039	234799179	11.5589	4.95668	+
chr1	235274316	235274512	10.7757	3.15005	-
chr1	235274550	235274576	2.01216	2.47428	-
chr1	235274604	235274653	4.87639	2.31157	-
chr1	235274682	235274854	16.2176	3.14597	-
chr1	235274887	235274963	13.2342	3.35019	-
chr1	235434241	235434300	2.31495	3.79572	-
chr1	235467136	235467221	2.9307	4.05924	-
chr1	235835162	235835294	9.91293	5.64421	-
chr1	235898121	235898199	3.56068	4.34227	-
chr1	235900551	235900600	3.28988	3.42181	-
chr1	235900666	235900714	2.84406	3.25189	-
chr1	235976638	235976751	5.31719	4.85345	-
chr1	235976988	235977034	3.41117	4.25189	-
chr1	235977206	235977268	3.27894	4.07199	-
chr1	237766443	237766556	4.63719	2.07924	+
chr1	237766742	237766766	2.79752	3.21971	+
chr1	241796015	241796086	2.01216	2.47428	-
chr1	242026145	242026223	2.84406	3.25189	+
chr1	242351245	242351288	2.84406	3.25189	-
chr1	242351492	242351551	2.47189	3.29572	-
chr1	242351580	242351646	2.75253	2.84227	-
chr1	242351699	242351713	3.41117	4.25189	-
chr1	242354090	242354169	9.11754	5.22305	-
chr1	242354959	242355026	2.10648	3.63475	-
chr1	242364395	242364443	2.18977	3.01761	-
chr1	242375541	242375567	4.87844	4.71132	-
chr1	242375690	242375741	5.04809	3.50323	-
chr1	242375804	242375947	24.1101	4.27126	-
chr1	242377053	242377139	3.27954	4.1642	-
chr1	242381872	242381948	11.2444	5.77281	-
chr1	242381974	242382046	4.04796	4.50323	-
chr1	242387413	242387473	2.18977	3.01761	-
chr1	242387849	242387905	3.87526	4.36447	-
chr1	242508644	242508713	2.45655	3.83685	-
chr1	242577444	242577523	3.97584	3.63475	-
chr1	242580409	242580508	4.37065	3.53843	-
chr1	242629641	242629737	40.3808	5.12042	-
chr1	242630244	242630299	5.89174	3.63475	-
chr1	242630640	242630690	2.17334	3.75458	-
chr1	242636702	242636803	3.24124	2.98885	-
chr1	242636943	242637010	2.18977	3.01761	-
chr1	242640741	242640759	2.45655	3.83685	-
chr1	242640897	242641089	5.91403	4.64642	-
chr1	242641177	242641201	2.40671	3.05924	-
chr1	242658727	242658805	7.09474	5.19595	-
chr1	242658814	242658940	6.26259	3.73426	-
chr1	242658953	242659019	4.48554	3.74595	-
chr1	242659049	242659065	2.17334	3.75458	-
chr1	242662082	242662153	10.239	5.12006	-
chr1	242662253	242662343	9.76271	3.25327	-
chr1	242669129	242669203	3.24124	2.98885	-
chr1	242670284	242670371	2.65443	3.24001	-
chr1	242677965	242678109	3.89524	2.76627	-
chr1	242678191	242678226	2.67819	4.01761	-
chr1	243326116	243326166	3.89654	4.42181	-
chr1	243422275	243422359	4.87844	4.71132	+
chr1	243451894	243451943	3.41117	4.25189	+
chr1	243452761	243452822	2.15602	2.54979	+
chr1	243454573	243454640	7.3931	5.28968	+
chr1	243472628	243472731	2.45655	3.83685	+
chr1	243483044	243483150	11.0702	4.86447	+
chr1	243483393	243483438	3.03259	4.00323	+
chr1	243525881	243525991	3.11219	4.0882	+
chr1	243600548	243600656	5.28405	4.74595	+
chr1	243664523	243664623	5.13585	3.95233	-
chr1	243852875	243852986	2.42944	3.8365	-
chr1	243886232	243886321	3.89848	3.63475	-
chr1	243889645	243889680	2.17334	3.75458	-
chr1	243892413	243892481	2.18977	3.01761	-
chr1	243921950	243922035	15.6576	7.06374	-
chr1	243925034	243925088	2.80445	4.03843	-
chr1	243928844	243928929	3.00099	2.91827	-
chr1	243930169	243930209	3.43652	3.50323	-
chr1	243930310	243930341	2.45655	3.83685	-
chr1	243946740	243946811	3.08608	3.23295	-
chr1	243991416	243991475	3.13001	3.43265	-
chr1	244002110	244002204	2.24531	3.21971	-
chr1	244004064	244004097	3.19105	4.24001	-
chr1	244004174	244004244	5.22614	4.08424	-
chr1	244004676	244004746	3.01064	3.33091	-
chr1	244009834	244009903	2.67819	4.01761	-
chr1	244588790	244588907	4.03394	2.6772	-
chr1	244588993	244589108	5.74674	2.49633	-
chr1	244595062	244595105	2.45655	3.83685	-
chr1	244828711	244828761	2.08173	3.6642	+
chr1	244999348	244999413	2.30595	3.63475	+
chr1	244999446	244999512	3.74304	3.57382	+
chr1	245004108	245004223	2.44177	2.42181	+
chr1	245004343	245004397	2.40671	3.05924	-
chr1	245013506	245013583	16.7118	4.03076	-
chr1	245013611	245013789	14.6195	3.24732	-
chr1	245013810	245013834	5.02436	2.61446	-
chr1	245013860	245013942	7.75978	3.22305	-
chr1	245013989	245014044	4.32164	1.93859	-
chr1	246211114	246211151	2.45655	3.83685	-
chr1	246235426	246235499	2.18977	3.01761	-
chr1	246235620	246235793	3.28361	2.95139	-
chr1	246303687	246303773	5.48549	3.97096	-
chr1	246309082	246309158	4.27258	4.40691	-
chr1	246387748	246387788	2.17334	3.75458	-
chr1	246387982	246388117	2.5054	2.92723	-
chr1	246440363	246440443	2.24734	2.65504	-
chr1	246458415	246458504	6.57526	5.0882	-
chr1	246460693	246460779	2.79226	4.00323	-
chr1	246465281	246465395	2.30507	3.74595	-
chr1	246465903	246465996	3.18793	4.07382	-
chr1	246466049	246466148	3.58248	4.33091	-
chr1	246475635	246475714	3.58248	4.33091	-
chr1	246476096	246476163	2.54863	3.71971	-
chr1	246590303	246590397	2.32681	2.44047	-
chr1	246591390	246591436	4.87844	4.71132	-
chr1	246591890	246592179	12.6348	5.6712	-
chr1	246624255	246624341	2.84406	3.25189	-
chr1	246624440	246624580	4.38574	4.57382	-
chr1	246627996	246628121	3.64092	2.83685	-
chr1	246813803	246813850	2.45655	3.83685	+
chr1	247043101	247043157	4.82045	4.73295	-
chr1	247043254	247043361	5.66331	4.50323	-
chr1	247043395	247043438	2.45655	3.83685	-
chr1	247045982	247046052	2.16686	2.45347	-
chr1	247046299	247046345	2.45655	3.83685	-
chr1	247050997	247051138	2.8292	2.40691	-
chr1	247052206	247052316	3.03494	4.0882	-
chr1	247053851	247053910	3.82271	4.42723	-
chr1	247053998	247054164	4.41734	3.32206	-
chr1	247313718	247313750	2.17334	3.75458	-
chr1	247314370	247314446	5.35336	4.86447	-
[truncated: 20,183 more rows]

## Sheet: RBFOX1 CLIP (p-value<0.01)
Supplementary Table S5 - CLIP peaks called by CLIPper and normalized to size-matched input
RBFOX1 CLIP peaks with p-value<0.01
Chromosome	Start	End	-log10(p-value)	log2(fold-change)	Strand
chr1	790575	790704	15.6576	7.56722	+
chr1	790757	790963	15.4985	6.57195	+
chr1	879846	879960	4.00066	2.65287	-
chr1	884039	884192	5.20395	3.12172	-
chr1	884385	884420	3.01589	3.49288	-
chr1	884449	884558	13.7045	5.40517	-
chr1	884614	884658	5.09341	4.12178	-
chr1	885041	885061	3.10287	3.55923	-
chr1	885407	885643	10.7047	5.07534	-
chr1	885677	885813	15.6576	6.50126	-
chr1	885968	886006	3.69616	3.79627	-
chr1	958707	958744	3.9468	3.81137	+
chr1	961219	961279	3.39653	2.78466	+
chr1	961354	961395	3.43489	2.94702	+
chr1	961407	961428	2.1895	2.45231	+
chr1	962602	962681	9.97322	4.92783	+
chr1	962752	962897	10.1638	4.44345	+
chr1	974206	974332	14.9658	2.9217	+
chr1	974584	974703	2.95434	1.05187	+
chr1	978291	978331	3.05977	2.79985	+
chr1	988417	988846	92.5261	7.24434	+
chr1	988863	989011	119.377	6.11066	+
chr1	990417	990509	11.2292	3.19429	+
chr1	990604	990661	3.43142	2.53243	+
chr1	1043425	1043687	14.55	5.34991	-
chr1	1043732	1043870	14.8911	5.78625	-
chr1	1043910	1043990	15.6576	5.99224	-
chr1	1044187	1044270	15.6576	6.43287	-
chr1	1047738	1048062	8.2551	4.05198	-
chr1	1154622	1154797	2.40593	3.18203	-
chr1	1169040	1169165	3.11037	3.51967	+
chr1	1195541	1195621	2.29325	3.23708	-
chr1	1203792	1203876	2.71142	3.36261	-
chr1	1204620	1204706	3.41071	3.68133	-
chr1	1227807	1227955	5.95777	4.33377	-
chr1	1235443	1235508	2.39705	3.26629	-
chr1	1236974	1237114	2.9282	2.03812	-
chr1	1239543	1239613	2.61009	3.33061	-
chr1	1241396	1241417	2.88706	2.34775	-
chr1	1241962	1242105	15.6576	6.19209	-
chr1	1242233	1242347	15.6576	7.69752	-
chr1	1242387	1242457	12.5183	5.30597	-
chr1	1242598	1242688	13.7777	4.53066	-
chr1	1255111	1255231	3.65084	3.60854	-
chr1	1255740	1255803	2.90625	3.49912	-
chr1	1256161	1256274	10.5896	5.07154	-
chr1	1271934	1272150	5.99717	3.82645	-
chr1	1274282	1274386	7.17903	3.72657	-
chr1	1275203	1275391	12.2213	5.49025	-
chr1	1276864	1276939	2.70989	3.38481	-
chr1	1326499	1326682	6.12613	1.66963	-
chr1	1327740	1327858	4.54971	3.14796	-
chr1	1327909	1327988	2.67026	2.64331	-
chr1	1328337	1328422	4.36047	2.50326	-
chr1	1475214	1475580	7.22977	4.40557	-
chr1	1477061	1477172	15.6576	6.27279	-
chr1	1477289	1477377	12.9029	5.31041	-
chr1	1477396	1477476	8.14563	4.70897	-
chr1	1559695	1559792	2.0956	3.09777	+
chr1	1623795	1623897	4.44535	3.00566	-
chr1	1666443	1666562	5.39463	4.20587	-
chr1	1686709	1686760	5.20901	4.19575	-
chr1	1686909	1687014	14.4246	5.07365	-
chr1	1687207	1687555	15.6576	5.70451	-
chr1	1687598	1687629	3.3209	3.56258	-
chr1	1693477	1693822	10.0734	4.64019	-
chr1	1695581	1695659	6.24364	3.12129	-
chr1	1695687	1695844	15.3564	6.05258	-
chr1	1695917	1695997	12.182	5.22506	-
chr1	1696439	1696495	2.50636	3.2916	-
chr1	1716748	1716894	33.2187	5.30302	-
chr1	1716911	1717001	15.6576	6.81721	-
chr1	1717189	1717241	14.9909	4.2278	-
chr1	1717245	1717381	15.6576	8.15401	-
chr1	1717389	1717497	15.6576	6.9974	-
chr1	1718760	1718771	2.90924	3.46842	-
chr1	1718781	1718876	13.2504	5.52385	-
chr1	1720490	1720523	4.77208	4.05877	-
chr1	1764901	1764986	2.07996	2.59958	-
chr1	1807209	1807280	3.71829	3.75187	-
chr1	1807482	1807504	4.35096	3.16098	-
chr1	1807818	1808121	206.657	5.57456	-
chr1	2101091	2101181	2.40554	2.46734	+
chr1	2101244	2101334	4.67273	4.02956	+
chr1	2116501	2116582	2.3726	2.58132	+
chr1	2120986	2121120	4.77867	2.8086	-
chr1	2162306	2162482	2.93006	2.5572	+
chr1	2174975	2175095	5.61637	4.23297	+
chr1	2175121	2175222	3.78386	2.92151	+
chr1	2187831	2187910	4.79354	3.96408	+
chr1	2188031	2188116	11.651	4.30028	+
chr1	2188396	2188463	3.9468	3.81137	+
chr1	2198975	2199032	3.31898	3.60407	+
chr1	2199198	2199242	2.00173	2.97381	+
chr1	2199739	2199835	4.48571	1.98203	+
chr1	2199924	2199996	7.83539	4.65988	+
chr1	2200191	2200262	3.84786	3.03452	+
chr1	2200371	2200447	4.58586	2.80343	+
chr1	2201065	2201197	11.9155	4.15964	+
chr1	2201211	2201304	15.6576	5.82378	+
chr1	2201427	2201520	15.6576	5.98697	+
chr1	2219078	2219204	8.49426	3.94535	+
chr1	2229335	2229425	2.40288	3.22506	+
chr1	2239466	2239568	15.6576	6.48341	+
chr1	2239620	2239687	15.6576	7.53636	+
chr1	2239726	2239829	15.6576	8.27191	+
chr1	2239834	2240070	15.6576	8.29732	+
chr1	2240099	2240166	31.3176	4.92525	+
chr1	2240976	2241043	15.6576	6.79834	+
chr1	2241411	2241554	15.6576	7.93011	+
chr1	2298216	2298365	7.12323	3.40261	-
chr1	2298493	2298555	7.40072	4.57575	-
chr1	2298575	2298641	7.83793	4.51552	-
chr1	2298651	2298700	3.30879	3.58132	-
chr1	2298963	2299052	2.49441	3.30252	-
chr1	2303393	2303403	4.133	3.88116	-
chr1	2303415	2303512	15.6576	6.0262	-
chr1	2303575	2303749	15.6576	6.04236	-
chr1	2303757	2303846	15.6127	5.17851	-
chr1	2327636	2327812	5.80371	3.9715	+
chr1	2328099	2328196	6.97572	4.54578	+
chr1	2340876	2340963	2.96834	2.37912	-
chr1	2364675	2364775	6.54547	3.62439	+
chr1	2368272	2368328	2.18189	2.03155	+
chr1	2368390	2368461	3.9242	3.86449	+
chr1	2371496	2371546	16.2084	3.34204	+
chr1	2371709	2371759	15.6576	5.01518	+
chr1	2371874	2371955	15.6576	6.6162	+
chr1	2371973	2372204	15.6576	7.95962	+
chr1	2372235	2372336	15.6576	7.05147	+
chr1	2373023	2373078	4.16596	3.89089	+
chr1	2379253	2379272	2.1064	3.12536	+
chr1	2379300	2379355	3.42271	3.68133	+
chr1	2379438	2379512	5.92852	4.33093	+
chr1	2379653	2379887	11.1271	4.09037	+
chr1	2382171	2382204	2.69508	3.39573	+
chr1	2390505	2390613	3.47478	3.64484	+
chr1	2390683	2390836	9.45356	4.77018	+
chr1	2391087	2391245	11.5245	4.8376	+
chr1	2392600	2392713	7.45424	3.7557	+
chr1	2392844	2392868	2.08113	3.0738	+
chr1	2412391	2412567	3.3042	2.06302	+
chr1	2412640	2412738	2.98753	3.47094	+
chr1	2412776	2412856	7.07563	4.56919	+
chr1	2415722	2415845	10.4816	4.19548	+
chr1	2432673	2432770	6.9928	4.48499	+
chr1	2433450	2433496	5.16513	4.14419	+
chr1	2434342	2434975	55.5709	6.68563	+
chr1	2435213	2435278	19.0267	2.89089	+
chr1	2443370	2443477	2.38996	3.27906	-
chr1	2444147	2444318	3.91042	3.18613	-
chr1	3380635	3380855	2.83941	3.44199	+
chr1	3414519	3414745	9.4205	4.31362	-
chr1	3421262	3421359	5.33655	3.77273	-
chr1	3426687	3426823	11.0418	5.08386	-
chr1	3426849	3426938	9.76071	4.90517	-
chr1	3426977	3427101	5.92191	3.33061	-
chr1	3427139	3427323	6.35544	4.08787	-
chr1	3545425	3545460	4.3317	3.98499	+
chr1	3545475	3545630	10.4775	5.41614	+
chr1	3545934	3546026	11.993	5.16348	+
chr1	3546432	3546613	13.9692	5.95533	+
chr1	3557203	3557361	3.12127	3.52988	-
chr1	3639280	3639656	14.5524	6.00631	+
chr1	3827063	3827216	7.74214	4.61849	+
chr1	5923007	5923218	8.41533	4.71704	-
chr1	5933733	5933851	2.69643	3.41104	-
chr1	5934083	5934159	3.93905	3.83582	-
chr1	5942761	5942885	2.90922	3.47381	-
chr1	5944759	5944842	2.79981	3.44758	-
chr1	5944862	5945056	5.1945	4.14356	-
chr1	5945118	5945215	3.423	3.6716	-
chr1	5947823	5947933	2.2575	2.86261	-
chr1	5949861	5949960	2.05123	2.94516	-
chr1	5950024	5950190	5.89459	4.18842	-
chr1	5968958	5969134	2.36314	3.00268	-
chr1	6009671	6009850	12.7324	5.29882	-
chr1	6009900	6009980	2.70115	3.42035	-
chr1	6059845	6060162	8.96748	4.38629	+
chr1	6281483	6281634	7.31569	3.7678	-
chr1	6284518	6284687	11.5986	4.12394	-
chr1	6342662	6342927	5.56153	3.38658	-
chr1	6342977	6343029	2.29679	3.26286	-
chr1	6367798	6367877	11.2117	4.70936	-
chr1	6367910	6367967	11.6575	5.20353	-
chr1	6368023	6368112	15.6576	5.19424	-
chr1	6368128	6368333	15.6426	5.44379	-
chr1	6368351	6368489	15.515	5.24068	-
chr1	6368527	6368627	15.6576	5.28265	-
chr1	6368647	6368803	15.6576	5.64039	-
chr1	6374002	6374128	3.16954	2.84782	-
chr1	6374287	6374408	2.23381	3.16079	-
chr1	6382047	6382177	2.59214	3.34229	-
chr1	6385733	6386000	3.62302	3.59902	-
chr1	6403259	6403398	2.45758	2.6358	-
chr1	6416388	6416559	15.6576	7.53082	-
chr1	6417763	6417819	2.70572	3.36761	-
chr1	6418279	6418374	8.35207	4.77695	-
chr1	6418421	6418578	11.1591	5.08354	-
chr1	6418765	6418834	3.84326	3.02956	-
chr1	6418957	6419008	2.70532	3.39206	-
chr1	6472728	6472858	2.57647	2.59958	-
chr1	6523019	6523131	2.17967	1.5838	-
chr1	6523175	6523316	2.646	1.55514	-
chr1	6524277	6524417	2.09741	1.16123	-
chr1	6549204	6549408	2.17031	2.37343	-
chr1	6651754	6651884	3.62606	3.75329	-
chr1	6652408	6652473	2.07852	3.14419	-
chr1	6657137	6657250	5.38979	4.2311	-
chr1	6657271	6657356	2.72345	2.25604	-
chr1	6682200	6682274	11.8759	5.21591	+
chr1	6682365	6682592	14.4085	5.93514	+
chr1	6682597	6682660	7.39347	3.7369	+
chr1	6682725	6682796	11.0544	5.06731	+
chr1	6683059	6683172	15.6576	6.58856	+
chr1	6683666	6683766	14.8703	5.84734	+
chr1	6683789	6683854	11.3151	4.27483	+
chr1	6711928	6712077	3.36509	2.30811	-
chr1	6885489	6885629	3.53157	3.34229	+
chr1	6945842	6945990	12.0859	5.23531	+
chr1	7827142	7827257	12.5781	5.41205	+
chr1	7827375	7827437	4.36544	3.86136	+
chr1	7827745	7827825	9.72685	4.841	+
chr1	7827876	7827943	3.21766	3.61032	+
chr1	7829597	7829747	8.51162	4.59631	+
chr1	7903489	7903609	4.03961	3.85948	+
chr1	7904418	7904545	3.41141	3.45848	+
chr1	7904565	7904629	3.62991	3.60854	+
chr1	7904707	7904840	12.3779	5.27976	+
chr1	8071844	8071915	4.98644	4.03155	-
chr1	8082921	8083115	2.33674	1.7827	-
chr1	8084102	8084202	2.56914	2.10913	-
chr1	8084431	8084627	3.1729	1.20819	-
chr1	8412575	8412732	5.9303	4.33191	-
chr1	8414767	8414847	3.31614	3.63477	-
chr1	8414885	8414989	7.72204	4.66092	-
chr1	8416159	8416278	15.6576	5.75874	-
chr1	8420620	8420738	6.98609	4.5409	-
chr1	8442468	8442551	4.35061	3.96626	-
chr1	8497493	8497574	4.14911	3.88542	-
chr1	8520836	8520955	2.70532	3.39206	-
chr1	8521023	8521117	3.92511	3.85506	-
chr1	8788031	8788310	4.16944	3.34844	-
chr1	8930652	8930861	6.48614	3.19718	-
chr1	8930945	8931096	11.6266	3.96695	-
chr1	8931204	8931271	2.06077	1.61856	-
chr1	8931691	8931771	6.65514	3.66029	-
chr1	9389261	9389385	2.29728	3.2004	+
chr1	9410627	9410723	2.07675	3.1551	+
chr1	9789121	9789202	12.4194	3.98499	-
chr1	9789885	9790145	38.5328	4.60479	-
chr1	9790169	9790193	8.44672	3.93271	-
chr1	9790330	9790483	57.75	4.90398	-
chr1	9796104	9796157	9.13929	4.01943	-
chr1	9796172	9796379	13.7336	5.83464	-
chr1	9797221	9797494	15.6576	6.70014	-
chr1	9815549	9815656	5.72412	4.04716	-
chr1	9910112	9910161	2.80815	3.44311	-
chr1	9910181	9910406	10.7223	4.49109	-
chr1	9942677	9942761	2.76428	2.70664	-
chr1	9990089	9990153	3.61682	3.74006	-
chr1	9990174	9990399	7.09884	4.29203	-
chr1	10166666	10166719	10.3726	5.05134	+
chr1	10166843	10166911	13.7029	5.41017	+
chr1	10167001	10167351	11.1557	3.7972	+
chr1	10167373	10167548	13.5196	5.00155	+
chr1	10168101	10168253	11.2237	4.5306	+
chr1	10170406	10170521	2.99981	3.49601	+
chr1	10197127	10197248	3.33883	2.77484	+
chr1	10240236	10240370	13.4236	5.45319	+
chr1	10240387	10240597	8.53077	4.3793	+
chr1	10339230	10339357	15.6576	6.1449	+
chr1	10340720	10341150	12.7281	5.5925	+
chr1	10342172	10342382	6.05882	3.45957	+
chr1	10357626	10357937	7.4856	4.20055	+
chr1	10362564	10362863	5.63316	3.8926	+
chr1	10436735	10436914	4.45151	3.99078	+
chr1	10696665	10696720	4.70663	4.02622	-
chr1	10744320	10744477	2.7084	3.3622	-
chr1	11082705	11082753	14.3059	4.00145	+
chr1	11083034	11083069	15.6576	5.89946	+
chr1	11083446	11083699	174.436	7.0187	+
chr1	11083724	11083800	15.6576	7.44408	+
chr1	11083896	11083955	15.6576	7.09253	+
chr1	11084673	11084787	12.1922	3.66133	+
chr1	11084927	11084949	2.75375	2.70607	+
chr1	11085111	11085191	7.29381	4.57906	+
chr1	11191338	11191415	4.34684	3.96626	-
chr1	11191470	11191534	3.05522	2.78606	-
chr1	11229325	11229437	5.34188	3.3738	-
chr1	11229802	11229890	3.12057	3.55302	-
chr1	11249433	11249561	5.35481	3.7715	-
chr1	11249695	11249911	13.9545	5.45764	-
chr1	11708466	11708587	2.37374	2.55302	-
chr1	11721474	11721698	13.6369	5.00764	+
chr1	11721706	11721729	2.08113	3.0738	+
chr1	11721821	11721833	2.08113	3.0738	+
chr1	11721844	11721964	4.95529	4.07201	+
chr1	11721976	11722046	2.31318	1.92035	+
chr1	11722296	11722326	2.4815	3.31606	+
chr1	11810347	11810477	2.30015	3.19434	+
chr1	11854671	11854752	4.14637	3.87871	-
chr1	11979691	11979972	12.3398	4.8167	-
chr1	12005531	12005666	2.65039	2.13095	+
chr1	12071943	12071999	11.1175	5.05901	+
chr1	12072285	12072339	8.20293	2.91571	+
chr1	12072384	12072662	15.6576	6.89224	+
chr1	12072788	12072886	15.6576	7.18233	+
chr1	12073185	12073203	5.76095	3.50387	+
chr1	12073396	12073546	15.2544	6.43784	+
chr1	12086535	12086722	15.6576	5.23559	+
chr1	12086730	12086803	4.36834	3.91688	+
chr1	12088432	12088606	2.10355	2.7655	+
chr1	12569383	12569539	10.7308	3.73907	+
chr1	12570567	12570658	2.1046	3.08132	+
chr1	12570740	12570861	4.13477	3.90635	+
chr1	12627951	12628042	2.47638	2.00016	-
chr1	12628216	12628453	4.22927	2.89646	-
chr1	14081205	14081275	3.31391	3.63219	+
chr1	14081310	14081585	7.09744	4.30157	+
chr1	14113068	14113133	9.84396	4.97702	+
chr1	14113170	14113267	15.6576	6.83429	+
chr1	14113323	14113469	13.5498	5.30679	+
chr1	15393284	15393404	11.4176	4.29428	+
chr1	15513775	15513996	3.59693	3.55337	+
chr1	15519386	15519453	2.69962	3.44728	+
chr1	15519517	15519635	6.5696	4.44002	+
chr1	15522541	15522646	4.04992	3.84934	+
chr1	15755283	15755314	3.92372	3.83934	+
chr1	15755367	15755647	14.4708	4.22667	+
chr1	15756097	15756324	14.994	5.9164	+
chr1	15756353	15756422	8.25135	4.72997	+
chr1	15988816	15988966	6.45137	3.29448	+
chr1	15989868	15990002	12.4777	4.50089	+
chr1	15990103	15990343	12.3324	5.61403	+
chr1	15990445	15990547	11.4558	5.17119	+
chr1	15991786	15991887	14.6595	5.50454	+
chr1	15991903	15991964	3.51605	3.7311	+
chr1	15993278	15993349	3.54248	2.94255	+
chr1	15993768	15993852	2.30426	1.94702	+
chr1	15994395	15994673	13.9422	5.21426	+
chr1	15995353	15995430	5.18707	4.16997	+
chr1	16060873	16061121	3.73442	3.74038	+
chr1	16451052	16451211	6.51456	3.81471	-
chr1	16722034	16722091	5.3243	3.39805	+
chr1	16722133	16722248	19.9966	4.55639	+
chr1	16722266	16722300	3.10314	3.61078	+
chr1	16723854	16723964	2.06417	1.81606	+
chr1	16946780	16946890	4.25766	3.88542	-
chr1	16953077	16953221	2.13041	2.65843	-
chr1	17251363	17251441	7.40521	4.6072	+
chr1	17251526	17251705	15.6576	5.96647	+
chr1	17256070	17256211	15.6576	6.05375	+
chr1	17297526	17297663	2.37085	3.2082	+
chr1	17359070	17359162	4.67164	4.02107	-
chr1	17359208	17359333	4.0136	3.85809	-
chr1	17359351	17359495	9.31741	4.87303	-
chr1	17734374	17734479	7.93449	4.70761	-
chr1	17882514	17882622	2.29606	3.2004	+
chr1	17923561	17923657	2.70532	3.39206	+
chr1	17937044	17937221	7.2955	4.58132	+
chr1	17939303	17939567	4.0406	3.18217	+
chr1	17941714	17941932	3.39043	3.29367	+
chr1	17961097	17961309	12.8919	5.45482	+
chr1	17961747	17961802	2.09278	3.13133	+
chr1	17961941	17961991	3.10314	3.61078	+
chr1	17969397	17969487	2.29547	3.22354	+
chr1	17995095	17995187	2.10114	3.03155	+
chr1	18009887	18009985	5.61351	4.26201	+
chr1	18010152	18010217	3.13483	3.42611	+
chr1	18010434	18010618	9.58267	4.91158	+
chr1	19198066	19198136	2.27876	3.24006	-
chr1	19198148	19198226	2.80949	3.41571	-
chr1	19231778	19231913	11.016	3.48054	-
chr1	19232444	19232505	4.18978	2.71591	-
chr1	19232732	19232944	7.20051	2.55237	-
chr1	19243644	19243803	15.6576	7.69549	-
chr1	19243808	19244022	14.8218	6.00369	-
chr1	19244149	19244199	14.0646	5.56199	-
chr1	19266916	19266997	4.56622	3.97702	-
chr1	19401102	19401291	3.45866	2.8676	-
chr1	19466398	19466456	6.14128	4.37687	-
chr1	19466478	19466586	13.8182	5.41688	-
chr1	19466940	19467175	12.7889	5.51929	-
chr1	19559864	19559974	4.25614	3.92611	-
chr1	19560578	19560659	3.80716	3.82403	-
chr1	19666512	19666636	3.72864	3.77128	-
chr1	19667436	19667497	3.36572	2.89089	-
chr1	19667526	19667633	6.38292	4.3107	-
chr1	19667678	19667860	12.0318	5.26324	-
chr1	19729783	19729887	2.59781	3.36261	-
chr1	19983848	19984020	2.22417	2.64007	+
chr1	20096349	20096435	2.29325	3.23708	-
chr1	20808916	20809164	15.6576	7.38358	-
chr1	20809193	20809370	127.814	6.1805	-
chr1	20809389	20809549	150.008	5.6573	-
chr1	20809589	20809727	15.6576	6.8061	-
chr1	20810021	20810088	60.3703	4.88581	-
chr1	20826534	20826641	2.70317	3.37749	-
chr1	20826740	20826832	2.66911	2.6716	-
chr1	20940402	20940571	10.6116	4.99706	+
chr1	20940603	20940701	6.02095	3.5257	+
chr1	20942761	20942920	5.98634	3.43443	+
chr1	20977157	20977314	4.63776	3.22657	+
chr1	20978688	20978853	5.16479	2.48112	-
chr1	21069210	21069346	4.02862	3.8738	-
chr1	21081027	21081304	2.58849	2.71629	-
chr1	21107644	21107722	2.15502	2.09637	-
chr1	21309618	21309767	2.49936	3.30529	-
chr1	21328463	21328553	2.191	3.16997	-
chr1	22005403	22005474	2.90821	3.47809	-
chr1	22005524	22005679	3.50225	3.15045	-
chr1	22149132	22149287	8.82593	3.05871	-
chr1	22149642	22149708	4.43291	3.20392	-
chr1	22201819	22201936	7.10585	2.8293	-
chr1	22211969	22212188	15.6576	5.98204	-
chr1	22212194	22212224	7.55284	4.63632	-
chr1	22212491	22212625	15.6576	6.30531	-
chr1	22212888	22212988	12.9461	5.47052	-
chr1	22212999	22213018	3.51258	3.70607	-
chr1	22213535	22213574	2.09727	3.08316	-
chr1	22213620	22213689	3.31331	3.6551	-
chr1	22214558	22214946	10.2282	4.51896	-
chr1	22215078	22215159	6.40252	4.4143	-
chr1	22227812	22227915	2.1064	3.12536	-
chr1	22389609	22389687	7.36547	3.25037	+
chr1	22415877	22415961	6.76021	3.67242	+
chr1	22416084	22416175	15.8489	3.79333	+
chr1	22416313	22416451	5.8437	4.22918	+
chr1	22416550	22416575	2.02068	2.38839	+
chr1	22416749	22416796	4.03308	3.88481	+
chr1	22416926	22417008	4.12996	3.11959	+
chr1	22417022	22417108	6.7599	3.67119	+
chr1	22418429	22418470	3.02626	2.11386	+
chr1	22418893	22419042	28.3035	3.12433	+
chr1	22419293	22419364	4.84521	2.61078	+
chr1	23392243	23392335	3.31896	3.60497	+
chr1	23392369	23392464	3.42366	3.66422	+
chr1	23392513	23392584	2.00191	3.03943	+
chr1	23394657	23394735	2.8136	3.39206	+
chr1	23411459	23411767	15.6576	8.75958	-
chr1	23411806	23411833	15.6576	5.12536	-
chr1	23412121	23412191	15.6576	5.92819	-
chr1	23412632	23412783	15.6576	7.05758	-
chr1	23412830	23412874	15.6576	5.28601	-
chr1	23414578	23414768	9.34458	4.40487	-
chr1	23415098	23415206	15.6576	5.62918	-
chr1	23448903	23449126	15.6576	5.9153	-
chr1	23449256	23449391	15.6576	4.32798	-
chr1	23450568	23450666	3.47888	2.44303	-
chr1	23450713	23450775	2.19759	2.46842	-
chr1	23461428	23461522	9.432	3.58234	-
chr1	23487608	23487669	2.69962	3.44728	-
chr1	23487693	23487736	2.30969	3.16009	-
chr1	23487771	23487953	11.2941	4.51049	-
chr1	23631661	23631932	9.70313	1.91282	-
chr1	23636301	23636344	10.3012	3.69047	-
chr1	23636405	23636498	15.6576	5.08659	-
chr1	23636508	23636648	27.121	3.43085	-
chr1	23636672	23636706	6.9535	3.26286	-
chr1	23636730	23636761	7.47886	3.74597	-
chr1	23636782	23636824	8.30066	3.89775	-
chr1	23685981	23686016	15.0362	5.66288	-
chr1	23686042	23686210	15.6576	8.36993	-
chr1	23686320	23686340	13.7069	5.40693	-
chr1	23686784	23686811	10.494	5.06294	-
chr1	23686821	23686856	9.3112	4.88542	-
chr1	23686923	23686978	15.6576	5.13954	-
chr1	23687199	23687252	15.6576	5.73143	-
chr1	23687345	23687488	15.6576	7.56553	-
chr1	23687834	23687850	7.74763	3.81796	-
chr1	23687887	23687948	15.6576	5.77128	-
chr1	23697722	23697875	2.19834	3.11386	+
chr1	23786047	23786175	2.72666	3.22506	-
chr1	23885814	23885951	2.40558	3.19883	-
chr1	24020950	24021025	2.57288	2.63563	+
chr1	24021044	24021171	2.73982	1.74409	+
chr1	24114171	24114261	5.29826	4.17486	+
chr1	24114310	24114610	12.1035	4.80782	+
chr1	24667418	24667504	2.19899	3.14331	+
chr1	24790514	24790551	2.19792	3.1551	+
chr1	24791529	24791591	3.33245	3.66141	+
chr1	24791644	24791824	12.5577	4.67288	+
chr1	24795475	24795541	7.28684	4.59096	+
chr1	24795816	24795911	5.9267	4.327	+
chr1	24796073	24796188	15.6576	5.72591	+
chr1	24798481	24798596	2.39756	2.96748	+
chr1	24799324	24799443	14.809	5.73393	+
chr1	24833701	24833829	2.72648	3.29985	+
chr1	24999283	24999439	10.7829	4.17716	+
chr1	24999473	24999533	2.76824	2.69883	+
chr1	24999556	24999620	2.40551	2.90635	+
chr1	25103580	25103625	2.29547	3.22354	+
chr1	25166484	25166532	3.19789	3.62178	+
chr1	25167522	25167586	40.69	4.36522	+
chr1	25167833	25167925	15.6576	6.56073	+
chr1	25168179	25168387	122.073	7.25814	+
chr1	25168565	25168811	79.7146	7.1846	+
chr1	25168844	25168879	15.6576	6.87515	+
chr1	25168905	25169135	54.0918	7.62224	+
chr1	25169177	25169258	23.2184	4.96437	+
chr1	25169464	25169484	15.6576	4.43135	+
chr1	25170241	25170364	400	6.70961	+
chr1	25170477	25170490	15.0607	3.95351	+
chr1	25170646	25170711	15.6576	5.7645	+
chr1	25226074	25226208	7.70316	4.63799	-
chr1	25226242	25226308	2.50514	3.25475	-
chr1	25664810	25664950	2.83255	2.70762	+
chr1	25666964	25667063	2.30911	3.10943	+
chr1	25679381	25679466	2.99648	3.52956	+
chr1	25687163	25687329	11.6839	3.83017	+
chr1	25688549	25688814	15.6576	6.1444	+
chr1	25826430	25826526	2.09431	3.08316	+
chr1	25877844	25877927	2.19759	2.46842	+
chr1	25877941	25878019	5.64264	3.44758	+
chr1	26127034	26127180	2.0956	3.09777	+
chr1	26159295	26159427	15.6576	6.22307	+
chr1	26226842	26226915	7.72262	4.61209	-
chr1	26227049	26227100	6.39653	4.45231	-
chr1	26227123	26227295	15.5567	6.01869	-
chr1	26227333	26227428	4.82456	1.59777	-
chr1	26510077	26510195	3.04506	2.81606	+
chr1	26870821	26870929	2.58983	3.39206	+
chr1	27070577	27070858	7.03591	4.425	+
chr1	27101415	27101532	2.10541	2.6181	+
chr1	27120731	27120832	10.186	5.00685	+
chr1	27120896	27120995	3.82324	3.06258	+
chr1	27121135	27121206	2.61708	3.25475	+
chr1	27181321	27181424	3.01088	3.47381	+
chr1	27190594	27190753	33.9737	3.53149	+
chr1	27190842	27190922	13.8733	3.8376	+
chr1	27272757	27272828	9.93969	4.94563	+
chr1	27338467	27338674	3.15275	2.83582	-
chr1	27425612	27425754	8.78617	3.20353	-
chr1	27425867	27425974	4.2922	1.95621	-
chr1	27426013	27426063	5.71916	4.28466	-
chr1	27426597	27426719	4.98718	2.79123	-
chr1	27443554	27443855	3.78911	3.17916	-
chr1	27455423	27455581	4.53322	3.53968	-
chr1	27620170	27620282	3.42332	3.67729	+
chr1	27632980	27633070	3.12224	3.51754	+
chr1	27634284	27634444	7.82315	4.68374	+
chr1	27669903	27670071	2.66436	2.00675	+
chr1	27671364	27671504	12.687	5.32492	+
chr1	27671540	27671695	12.9985	5.38531	+
chr1	27860812	27861008	11.0676	5.11515	-
chr1	27891678	27891775	2.68538	2.29742	-
chr1	27923095	27923288	3.12627	2.66209	-
chr1	27928140	27928243	15.6576	5.7581	-
chr1	28087216	28087349	13.9417	5.53223	+
chr1	28087894	28087941	2.48004	3.33684	+
chr1	28176981	28177053	2.71158	3.08097	+
chr1	28563318	28563469	4.32932	3.16956	+
chr1	28740143	28740253	2.30169	3.1716	+
chr1	28784390	28784557	4.58333	3.90543	+
chr1	29041601	29041748	2.84284	3.44724	+
chr1	29041764	29041859	2.395	3.25184	+
chr1	29043172	29043348	2.02592	3.06632	+
chr1	29044485	29044592	5.92777	4.3293	+
chr1	29044603	29044713	11.2159	5.14754	+
chr1	29214931	29215044	2.29421	2.50532	+
chr1	29387040	29387239	9.39505	4.90745	+
chr1	29388770	29388936	2.77689	3.12605	+
chr1	29395398	29395560	5.98292	4.30711	+
chr1	29398143	29398364	2.16806	2.45966	+
chr1	29409344	29409416	2.39705	3.26629	+
chr1	29409945	29409987	2.29679	3.26286	+
chr1	29409998	29410074	3.95754	3.03204	+
chr1	29566465	29566608	2.20496	2.6926	+
chr1	29571039	29571124	11.2784	5.16127	+
chr1	29572022	29572066	15.6576	4.79211	+
chr1	29572082	29572160	15.6576	7.0954	+
chr1	29572206	29572637	15.6576	6.95247	+
chr1	29572653	29572782	15.6576	6.81067	+
chr1	29573474	29573713	12.1908	5.51757	+
chr1	29637327	29637424	9.7611	4.92726	+
chr1	29637549	29637698	11.8816	5.21974	+
chr1	29637811	29637914	3.67695	3.65676	+
chr1	29652706	29652764	8.56045	4.79574	+
chr1	29652789	29652958	11.9783	4.82085	+
chr1	29653018	29653071	4.16596	3.89089	+
chr1	29653084	29653091	3.10287	3.55923	+
chr1	29653138	29653182	4.04217	3.8738	+
chr1	29653213	29653280	4.86616	3.07803	+
chr1	31343132	31343214	2.59881	3.32403	-
chr1	31404373	31404524	15.6576	6.60542	-
chr1	31404547	31404621	15.6576	7.35167	-
chr1	31404957	31405077	12.4634	3.59603	-
chr1	31405107	31405379	15.6576	5.74842	-
chr1	31422790	31422882	15.6576	6.62309	-
chr1	31888613	31888717	23.9512	3.96424	+
chr1	31888721	31888826	12.3237	3.15227	+
chr1	31889253	31889484	14.8134	3.41164	+
chr1	31890104	31890385	18.073	4.06567	+
chr1	31895377	31895564	4.3389	2.0082	+
chr1	31901222	31901375	4.41029	1.41979	+
chr1	31902632	31902737	6.48098	2.90102	+
chr1	31904348	31904702	3.9649	2.45671	+
chr1	32095541	32095648	5.80324	4.33093	-
chr1	32121344	32121447	2.22966	1.90162	-
chr1	32128000	32128120	6.87973	3.63799	-
chr1	32129431	32129487	3.33354	3.57854	-
chr1	32129989	32130086	4.38639	2.3293	-
chr1	32130105	32130323	5.73541	2.61092	-
chr1	32130377	32130508	2.37389	1.3706	-
chr1	32135163	32135242	5.19298	4.16833	-
chr1	32158868	32158922	2.19822	2.46842	-
chr1	32158936	32159082	6.85474	3.738	-
chr1	32159831	32159926	4.66985	4.02358	-
chr1	32160408	32160565	6.67551	4.43918	-
chr1	32168536	32168668	15.6576	6.34934	-
chr1	32168706	32168800	3.9639	3.73708	-
chr1	32372283	32372371	2.61399	3.22506	-
chr1	32508569	32508709	2.6045	1.06606	+
chr1	32509225	32509319	2.9634	2.40003	+
chr1	32543328	32543468	15.6576	6.87869	+
chr1	32543534	32543614	15.6576	5.92079	+
chr1	32543697	32543761	11.8919	5.19883	+
chr1	32638006	32638189	4.2107	3.58933	+
chr1	32638204	32638268	2.67887	2.63477	+
chr1	32638373	32638500	2.32881	2.17486	+
chr1	32799098	32799187	6.23286	3.58409	+
chr1	32830805	32830904	5.22405	2.9172	-
chr1	33066037	33066283	13.758	6.25771	+
chr1	33239395	33239556	11.8246	4.66264	+
chr1	33239614	33239641	2.1895	2.45231	+
chr1	33239646	33239815	8.9353	4.01643	+
chr1	33240004	33240072	4.91542	4.10416	+
chr1	33240118	33240130	2.28971	3.21131	+
chr1	33240143	33240238	7.10005	4.43053	+
chr1	33240266	33240364	5.93868	3.06027	+
chr1	33736138	33736192	2.60064	3.33191	+
chr1	33736308	33736341	2.28971	3.21131	+
chr1	33736461	33736701	12.129	4.79598	+
chr1	33736906	33736997	10.0608	4.99353	+
chr1	33738232	33738390	15.6576	5.6784	+
chr1	33738401	33738500	5.07352	4.14754	+
chr1	33738518	33738580	3.02685	3.44535	+
chr1	33765932	33766065	3.28128	2.91053	+
chr1	33808056	33808168	7.31278	3.31249	-
chr1	33820587	33820924	13.5833	5.73025	+
chr1	33836983	33837179	3.11001	3.53292	-
chr1	33954281	33954376	3.73757	3.00532	+
chr1	35459964	35460118	2.85147	3.35745	-
chr1	35554879	35555008	2.18427	3.18454	+
chr1	35580558	35580677	2.01114	2.37749	+
chr1	35581139	35581229	4.12841	3.92381	+
chr1	35581389	35581452	2.19834	3.11386	+
chr1	35644810	35644875	6.74057	2.92381	-
chr1	35649292	35649297	10.7286	3.43278	-
chr1	35649352	35649699	116.77	5.20075	-
chr1	35649869	35649960	25.503	3.9693	-
chr1	35899116	35899142	15.6576	6.11353	-
chr1	35899271	35899462	15.6576	9.08251	-
chr1	35900431	35900500	12.9461	5.40539	-
chr1	36030010	36030090	2.40517	3.24006	+
chr1	36031963	36032194	13.8651	4.93637	+
chr1	36032230	36032312	5.08964	4.13991	+
chr1	36180392	36180497	15.6576	7.05611	-
chr1	36180574	36180591	15.6576	6.15216	-
chr1	36180638	36180669	15.6576	6.34819	-
chr1	36180708	36181019	15.6576	7.97951	-
chr1	36181025	36181188	15.6576	8.92328	-
chr1	36321308	36321377	12.5186	5.2923	+
chr1	36321517	36321606	9.92457	4.96263	+
chr1	36321623	36321689	9.43459	4.91542	+
chr1	36321938	36322207	11.7418	4.8969	+
chr1	36322786	36322832	5.39927	4.2205	+
chr1	36322957	36323133	10.2904	4.48518	+
chr1	36323195	36323245	3.91507	3.0738	+
chr1	36349406	36349471	3.22011	3.58132	+
chr1	36386683	36386758	15.6576	6.41656	+
chr1	36386773	36386828	15.6576	6.19882	+
chr1	36386853	36386895	15.6576	5.22662	+
chr1	36386899	36387058	15.6576	7.33322	+
chr1	36387933	36388045	15.6576	6.97941	+
chr1	36388116	36388321	15.6576	9.36603	+
chr1	36389492	36389523	2.29394	2.49912	+
chr1	36389579	36389639	5.29752	4.19765	+
chr1	36389708	36389789	11.9922	5.22884	+
chr1	36391398	36391470	3.53609	3.61739	+
chr1	36639948	36640219	7.49615	4.16566	+
chr1	36641620	36641801	2.04001	2.69883	+
chr1	36646040	36646276	4.36142	2.38402	+
chr1	36769866	36769941	3.25308	1.64541	+
chr1	36770066	36770294	8.13185	3.69866	+
chr1	36770578	36770609	2.38721	2.54723	+
chr1	36770626	36770679	4.44007	3.1576	+
chr1	36770682	36770812	12.0114	4.75352	+
chr1	36781581	36781622	4.59287	3.92151	+
chr1	36787392	36787850	112.797	6.44965	+
chr1	36787664	36787749	7.16418	4.57401	-
chr1	36787916	36787959	15.6576	5.25464	+
chr1	36789682	36789719	6.91435	4.53135	+
chr1	36789750	36790084	13.9486	5.78078	+
chr1	36790105	36790171	8.1981	4.57201	+
chr1	36790424	36790462	4.34303	3.1634	+
chr1	36792876	36792989	15.6576	6.57233	+
chr1	36793173	36793287	15.155	4.66093	+
chr1	36793444	36793741	15.6576	5.56474	+
chr1	36831919	36832068	2.3099	3.11032	-
chr1	38056887	38057017	3.66241	3.71827	-
chr1	38057574	38057717	2.59214	3.34229	-
chr1	38148510	38148633	10.0546	4.98075	-
chr1	38266214	38266310	3.94072	3.83061	+
chr1	38277229	38277375	6.77332	4.49288	-
chr1	38279474	38279557	3.63441	3.72506	-
chr1	38279680	38279720	3.013	3.51653	-
chr1	38279820	38279855	2.69962	3.44728	-
chr1	38280337	38280463	6.5099	4.44551	-
chr1	38280476	38280591	15.6576	6.37476	-
chr1	38463865	38463997	15.6576	6.8275	-
chr1	38464236	38464433	14.4066	5.93258	-
chr1	38464489	38464501	4.58855	4.01288	-
chr1	38489880	38489989	8.25004	4.71859	+
chr1	38528448	38528509	4.68261	4.01653	+
chr1	38528543	38528576	4.58855	4.01288	+
chr1	38528604	38528733	15.6576	7.08038	+
chr1	38528747	38528839	5.13468	3.96081	+
chr1	38529301	38529342	3.21766	3.61032	+
chr1	38529851	38529936	4.13301	3.11739	+
chr1	38530019	38530172	15.6576	6.03559	+
chr1	38535636	38535770	3.31946	3.57854	+
chr1	38583014	38583127	9.53519	4.92511	+
chr1	38583300	38583392	4.0944	2.68987	+
chr1	38583481	38583589	5.39092	4.22771	+
chr1	38583729	38583781	2.80505	3.44758	+
chr1	38583881	38584081	5.7181	4.26101	+
chr1	38584104	38584230	8.4698	4.78849	+
chr1	39304259	39304365	7.40685	4.57201	-
chr1	39304486	39304565	7.07571	4.5621	-
chr1	39304582	39304667	7.19347	4.56731	-
chr1	39304682	39304806	7.37244	3.77324	-
chr1	39329365	39329544	2.16083	3.13682	-
chr1	39329644	39329772	6.23853	4.37994	-
chr1	39612331	39612470	2.18865	1.53236	+
chr1	39771534	39771648	6.66551	4.46788	+
chr1	39793656	39793727	3.02553	3.40162	+
chr1	39810237	39810341	2.01532	2.38481	+
chr1	39813046	39813177	15.6576	7.47264	+
chr1	39813871	39813971	15.6576	6.24157	+
chr1	39814014	39814215	15.6576	6.55497	+
chr1	39902291	39902370	3.13006	3.55832	+
chr1	39902612	39902809	3.71629	3.36878	+
chr1	39930828	39930952	15.6576	5.47712	+
chr1	39931315	39931458	9.07877	4.26245	+
chr1	39934169	39934266	2.51343	3.32699	+
chr1	39934976	39935056	8.93819	3.96449	+
chr1	39935064	39935208	13.484	4.06163	+
chr1	39935305	39935430	14.8699	5.52545	+
chr1	39936510	39936649	10.769	5.07287	+
chr1	40362613	40362740	11.5629	5.18062	-
chr1	40432359	40432482	8.57591	4.79385	+
chr1	40432611	40432801	7.89272	4.62392	+
chr1	40537999	40538180	2.77052	2.88018	+
chr1	40538513	40538660	8.77826	4.16542	-
chr1	40539093	40539291	8.92153	3.5469	-
chr1	40702567	40702724	3.11441	3.51649	+
chr1	40706389	40706537	8.94005	4.75017	+
chr1	40758383	40758451	2.77833	2.34115	+
chr1	40758630	40758714	15.6576	4.77173	+
chr1	41086376	41086420	2.59043	3.38481	-
chr1	41086422	41086530	10.163	5.01539	-
chr1	41086556	41086664	11.133	5.13348	-
chr1	41087563	41087739	4.92649	4.03965	-
chr1	41091390	41091449	6.03791	4.34358	-
chr1	41091509	41091619	15.6576	7.23445	-
chr1	41091651	41091743	8.26207	4.73783	-
chr1	41091776	41091831	5.01095	4.12536	-
chr1	41091973	41092015	4.74788	4.0738	-
chr1	41092054	41092098	4.44919	4.00532	-
chr1	41167064	41167193	2.57986	3.27714	+
chr1	41236855	41236875	6.49066	4.44728	+
chr1	41236903	41237108	15.6576	6.64874	+
chr1	41237158	41237268	15.409	6.8313	+
chr1	41477440	41477568	2.69735	3.42151	+
chr1	41510075	41510176	4.99448	4.08501	-
chr1	41990859	41990944	2.29325	3.23708	-
chr1	41990972	41991070	2.29606	3.2004	-
chr1	42010229	42010353	2.40138	3.20664	-
chr1	42011528	42011623	10.0496	5.0145	-
chr1	42013530	42013608	2.09696	2.43636	-
chr1	42013821	42013960	8.05438	4.70625	-
chr1	42026067	42026253	8.87541	4.75233	-
chr1	42046978	42047096	2.49957	3.30121	-
chr1	42367146	42367209	2.18995	3.18454	-
chr1	42367364	42367467	5.33782	3.37287	-
chr1	42370879	42371066	4.14789	3.84902	-
chr1	42642231	42642505	15.6576	8.42992	-
chr1	42642591	42642623	15.6576	6.41009	-
chr1	42642662	42642761	15.6576	8.64623	-
chr1	42642988	42643119	15.6576	7.26871	-
chr1	42643128	42643138	15.6576	6.84432	-
chr1	42643142	42643151	15.6576	6.5449	-
chr1	42643290	42643333	15.6576	7.58182	-
chr1	42643382	42643459	15.6576	7.20879	-
chr1	42643723	42643898	15.6576	8.20127	-
chr1	42644470	42644762	15.6576	7.28381	-
chr1	42644899	42644933	15.1998	4.78265	-
chr1	42645086	42645185	15.6576	7.46513	-
chr1	42657022	42657209	8.66088	3.00805	-
chr1	43391871	43392135	3.15259	2.23567	-
chr1	43392170	43392269	2.8219	2.05556	-
chr1	44002432	44002493	2.90469	3.48447	+
chr1	44029869	44029922	6.47652	4.39026	+
chr1	44029958	44030040	9.24393	4.01552	+
chr1	44030058	44030207	11.9586	5.32515	+
chr1	44030260	44030373	10.947	4.96367	+
chr1	44031110	44031210	11.6758	5.17851	+
chr1	44031376	44031448	2.78496	3.2998	+
chr1	44031669	44031742	3.85301	3.76054	+
chr1	44044849	44044870	14.5669	5.48367	+
chr1	44044900	44045344	15.6576	7.22525	+
chr1	44045827	44045957	15.6576	6.31744	+
chr1	44046001	44046063	14.864	5.6209	+
chr1	44046138	44046191	8.63098	3.65535	+
chr1	44048818	44048886	15.6576	6.91663	+
chr1	44048893	44049198	15.6576	7.93379	+
chr1	44049892	44049953	2.49364	1.95351	+
chr1	44050187	44050206	2.08113	3.0738	+
chr1	44050858	44051006	5.38926	3.39607	+
chr1	44052961	44052979	15.1568	4.66141	+
chr1	44052986	44053132	15.6576	6.72222	+
chr1	44053195	44053571	79.7146	8.204	+
chr1	44067807	44067897	10.9358	5.09619	+
chr1	44068119	44068136	3.74256	3.80343	+
chr1	44068144	44068271	8.70749	4.6822	+
chr1	44068289	44068426	13.7	5.68531	+
chr1	44068629	44068686	4.17564	3.01855	+
chr1	44068875	44068934	4.69241	3.9498	+
chr1	44070325	44070363	2.51343	3.32699	+
chr1	44070391	44070465	6.96615	4.51855	+
chr1	44088637	44088808	9.70618	4.51581	+
chr1	44089019	44089154	4.81554	1.58259	+
chr1	44327271	44327434	2.22398	3.15147	+
chr1	44328136	44328233	2.70532	3.39206	+
chr1	44345595	44345768	4.77257	4.06731	+
chr1	44456654	44456837	13.3924	5.44306	+
chr1	44686788	44686885	2.3398	1.89857	-
chr1	44716582	44716759	3.62809	3.75037	-
chr1	44749198	44749248	2.71959	3.29574	-
chr1	44749293	44749338	2.40558	3.19883	-
chr1	44749441	44749669	6.13349	2.83209	-
chr1	44820266	44820425	2.29834	1.39299	-
chr1	44820471	44820545	5.40983	4.20897	-
chr1	44883784	44883988	6.97767	3.09253	+
chr1	44938479	44938610	2.25491	2.29985	+
chr1	45101985	45102118	4.35821	3.90102	+
chr1	45276421	45276526	6.75018	4.50454	+
chr1	45277411	45277538	8.98469	3.30594	+
chr1	45277579	45277673	6.97572	4.54578	+
chr1	45277730	45277798	3.02185	3.46081	+
chr1	45976728	45976923	3.46102	2.87432	-
chr1	45984674	45984726	15.6576	5.98082	-
chr1	45987500	45987552	15.6576	5.81002	-
chr1	46074312	46074479	7.35912	1.84405	+
chr1	46093280	46093394	3.64359	2.98658	-
chr1	46164744	46164852	11.6284	4.31648	-
chr1	46466653	46466858	15.3081	6.29554	+
chr1	46467268	46467283	5.18707	4.16997	+
chr1	46467293	46467438	15.6576	7.27523	+
chr1	46508327	46508493	6.99158	4.42381	-
chr1	46509173	46509258	3.72863	3.7205	-
chr1	46744376	46744519	2.39655	1.85276	-
chr1	46775888	46775991	2.54567	2.51288	+
chr1	46782223	46782253	2.29322	3.2311	+
chr1	46876183	46876272	3.20409	3.61032	+
chr1	46876304	46876434	4.15822	3.86823	+
chr1	47023188	47023271	7.93229	4.70819	-
chr1	47023291	47023406	5.4867	4.21206	-
chr1	47049323	47049433	2.09377	3.09958	-
chr1	47050285	47050459	2.60291	3.30134	-
chr1	47051253	47051365	3.01306	3.52358	-
chr1	47140866	47140964	13.4729	5.39169	-
chr1	47141104	47141168	7.49183	4.62439	-
chr1	47141316	47141372	7.60195	4.66009	-
chr1	47141494	47141571	15.4072	4.71226	-
chr1	47141678	47141751	14.4447	5.4842	-
chr1	47141952	47141997	4.45211	3.96788	-
chr1	47142032	47142066	2.29959	2.47381	-
chr1	47142096	47142178	8.51194	3.89551	-
chr1	47143554	47143679	11.3658	3.79421	-
chr1	47154250	47154432	2.63287	2.07016	-
chr1	47154987	47155160	5.40251	4.17558	-
chr1	47716088	47716199	12.2929	5.27253	-
chr1	47843169	47843349	7.43071	3.54011	+
chr1	47843405	47843537	2.82566	2.46663	+
chr1	47897843	47897949	4.77566	3.97702	-
chr1	48402619	48402710	2.50678	3.25037	-
chr1	48402742	48402849	2.86837	2.72884	-
chr1	48402872	48403157	3.249	3.35955	-
chr1	51311948	51312186	6.34879	3.71623	-
chr1	51736863	51736991	12.0191	5.22013	+
chr1	51737147	51737194	2.47834	2.57668	+
chr1	51737470	51737688	9.73586	4.14123	+
chr1	51737968	51738036	4.13054	3.13477	+
chr1	51738315	51738353	2.10514	2.43636	+
chr1	51819998	51820080	3.05894	2.41104	-
chr1	51820252	51820363	10.539	4.45135	-
chr1	51821901	51822127	11.2952	3.76152	-
chr1	52485870	52486060	11.4217	4.59666	-
chr1	52486325	52486344	3.33245	3.66141	-
chr1	52552580	52552770	3.44439	3.58017	+
chr1	52553586	52553661	5.18485	4.16422	+
chr1	52730416	52730513	2.40558	3.19883	+
chr1	52730635	52730756	2.30165	3.1941	+
chr1	52818718	52818808	2.50021	3.20353	-
chr1	52826017	52826094	2.09377	3.09958	-
chr1	52904145	52904240	3.41631	3.66422	-
chr1	52908465	52908622	2.2988	3.20968	-
chr1	53287544	53287644	6.1409	3.56919	+
chr1	53292059	53292252	4.65895	3.74033	+
chr1	53359807	53359916	5.08618	4.11386	+
chr1	53361908	53361973	2.49957	3.30121	-
chr1	53362112	53362181	3.93238	3.79574	-
chr1	53379946	53380070	11.9535	2.45321	-
chr1	53516512	53516665	2.40293	1.92726	+
chr1	53708667	53708803	2.78458	2.32138	-
chr1	53712031	53712162	3.58809	2.05714	-
chr1	53712235	53712335	3.73788	2.31137	-
chr1	53712359	53712449	8.35207	4.77695	-
chr1	53712581	53712601	2.08113	3.0738	-
chr1	53738053	53738274	101.067	7.57154	-
chr1	53738481	53738558	16.9483	3.83336	-
chr1	53738831	53738901	15.6576	4.46878	-
chr1	53738907	53739020	15.6576	6.64324	-
chr1	53739030	53739052	11.3943	5.17847	-
chr1	53739117	53739183	15.2109	5.66244	-
chr1	53741420	53741511	2.57816	2.63477	-
chr1	53780899	53781127	3.74168	3.71167	-
chr1	54231158	54231280	6.97543	4.03738	-
chr1	54231361	54231429	10.7951	4.21907	-
chr1	54231649	54231671	2.48004	3.33684	-
chr1	54231685	54231815	12.0521	5.18719	-
chr1	54232109	54232183	5.0568	3.84234	-
chr1	54433674	54433798	2.57671	2.12729	+
chr1	54497379	54497644	19.4304	4.24106	-
chr1	54564978	54565088	3.2149	3.57201	+
chr1	54683214	54683316	3.53429	3.67486	+
chr1	55060361	55060468	3.30921	3.65007	+
chr1	55071875	55071973	15.6576	4.4498	+
chr1	55072010	55072051	2.31023	3.1551	+
chr1	55072117	55072223	14.6495	5.50967	+
chr1	55207902	55207975	3.10591	3.58132	+
chr1	55315323	55315802	65.7892	7.95858	-
chr1	55315854	55315922	15.6576	6.42832	-
chr1	55315979	55316072	15.6576	7.47753	-
chr1	55316649	55316742	30.1477	4.26101	-
chr1	55316826	55316839	3.70437	1.9218	-
chr1	55316964	55317003	11.3105	3.79627	-
chr1	55317212	55317280	11.6616	3.62962	-
chr1	55317824	55317836	8.573	3.9417	-
chr1	55318013	55318059	15.6576	7.03422	-
chr1	55319105	55319165	15.6576	6.91163	-
chr1	55330484	55330540	3.18276	2.20235	-
chr1	55331039	55331096	8.89224	4.83793	-
chr1	55530419	55530509	3.34884	2.8738	+
chr1	55670977	55671059	2.90821	3.47809	-
chr1	59041126	59041419	17.8174	4.38798	-
chr1	59041442	59041560	23.2267	3.65269	-
chr1	59120577	59120681	2.08332	3.10854	-
chr1	59137040	59137231	3.45254	1.96906	-
chr1	59247268	59247458	19.3935	2.93839	-
chr1	59247492	59247602	11.4631	4.46226	-
chr1	60339503	60339693	2.84871	3.09492	+
chr1	60340518	60340590	4.35724	3.96734	+
chr1	60340630	60340808	8.56755	3.71959	+
chr1	60341737	60341880	4.97178	4.13133	+
chr1	61651244	61651327	2.29659	3.20353	+
chr1	61922592	61922801	12.8907	5.06828	+
chr1	61922899	61922994	14.0958	6.42655	+
chr1	61923089	61923157	15.3097	4.77906	+
chr1	61923173	61923262	15.0269	4.67699	+
chr1	61923355	61923444	11.3195	4.95319	+
chr1	61923631	61923663	8.9859	3.9998	+
chr1	61923718	61923906	15.6576	5.49254	+
chr1	61924071	61924147	14.5724	4.28175	+
chr1	61924503	61924561	3.8367	3.03452	+
chr1	61924768	61924826	2.80642	2.59958	+
chr1	61924971	61925034	4.94896	3.23185	+
chr1	61925503	61925677	13.3658	5.35644	+
chr1	61926171	61926216	7.61523	4.64796	+
chr1	61926348	61926599	12.3287	6.30003	+
chr1	61928360	61928461	2.80505	3.44758	+
chr1	62470569	62470670	6.15172	4.03114	+
chr1	62628057	62628213	14.0563	4.12787	+
chr1	62628937	62629157	11.7398	4.60644	+
chr1	62703422	62703626	4.05824	2.60851	-
chr1	62706779	62706937	7.99253	3.8612	-
chr1	62734229	62734362	3.31331	3.6551	-
chr1	62736823	62737029	10.4758	5.03497	-
chr1	62737031	62737150	6.03546	4.3623	-
chr1	62743337	62743462	2.70549	3.4028	-
chr1	62767592	62767706	3.25976	2.84934	-
chr1	62776023	62776106	2.4165	3.18454	-
chr1	62776250	62776324	2.82818	3.32138	-
chr1	62917241	62917369	15.6576	5.2501	+
chr1	63009653	63009729	12.9367	5.32697	-
chr1	63009742	63009767	2.20633	3.12787	-
chr1	63009947	63010052	15.6576	5.94443	-
chr1	63010348	63010483	13.5584	4.57714	-
chr1	63906444	63906487	3.01506	3.48235	-
chr1	63906575	63906760	5.68403	3.33192	-
chr1	64644950	64645062	3.83928	3.73559	+
chr1	64646834	64647165	7.36114	3.82071	+
chr1	65298092	65298221	6.50089	3.83343	+
chr1	65298294	65298381	9.3079	4.8889	+
chr1	65298479	65298581	6.77042	4.48394	+
chr1	65298850	65298909	5.06955	4.12787	+
chr1	65298939	65298957	6.7656	4.49627	-
chr1	65299043	65299110	15.5214	4.76185	-
chr1	65299175	65299209	8.26612	4.73652	-
chr1	65299322	65299601	15.6576	6.75429	-
chr1	65300187	65300253	3.1061	3.57668	-
chr1	65697666	65697791	4.86381	4.08501	+
chr1	65897629	65897700	15.3351	4.22506	+
chr1	65897796	65898031	15.6576	6.42202	+
chr1	65898126	65898169	4.06767	2.24564	+
chr1	65899205	65899400	18.9443	5.64386	+
chr1	65899419	65899480	15.6576	5.86476	+
chr1	66100245	66100510	7.55654	4.49352	+
chr1	66101025	66101083	4.66555	4.01754	+
chr1	67451274	67451328	4.25648	3.88481	+
chr1	67451381	67451481	4.09049	2.7004	+
chr1	67451539	67451619	7.16392	4.56731	+
chr1	67452597	67452701	5.68173	4.15978	+
chr1	67452729	67452802	4.02425	3.10854	+
chr1	67452810	67452853	2.10913	2.40162	+
chr1	67453407	67453512	15.6576	4.89685	+
chr1	67465344	67465444	3.63381	3.72884	-
chr1	67873577	67873609	3.45763	3.29574	-
chr1	67873660	67873858	11.7144	3.49193	-
chr1	67873925	67874082	14.9464	5.43535	-
chr1	67876216	67876295	2.16915	2.50676	-
chr1	67877948	67878051	5.04915	2.27956	-
chr1	67878106	67878252	11.1572	4.68453	-
chr1	67878701	67878732	3.70316	2.61856	-
chr1	67878763	67878850	15.6576	5.62105	-
chr1	68151596	68151711	2.06577	1.67443	+
chr1	68167169	68167535	15.6576	7.93465	-
chr1	68167583	68167618	15.6576	6.13063	-
chr1	68168701	68169068	15.6528	6.12832	-
chr1	68169080	68169107	11.8122	5.22969	-
chr1	68170060	68170340	12.9539	5.36872	-
chr1	68284668	68284925	7.35464	3.92512	-
chr1	68362475	68362644	3.05275	2.80529	+
chr1	68940634	68940768	20.8703	4.33831	-
chr1	68941242	68941319	8.20704	4.74167	-
chr1	68947633	68947743	2.18766	3.20353	-
chr1	70610506	70610627	15.6576	6.63477	-
chr1	70696370	70696460	3.56385	2.77483	+
chr1	70696492	70696613	2.05161	1.28528	+
chr1	70716749	70716923	15.6576	7.40846	+
chr1	70716959	70717086	21.2022	4.51047	+
chr1	70717484	70717569	15.6576	5.90365	+
chr1	70717630	70717653	10.2347	5.01866	+
chr1	70718089	70718129	4.86441	4.0621	+
chr1	70727542	70727638	2.76886	2.69251	-
chr1	70727792	70727871	3.01088	3.47381	-
chr1	71528993	71529045	8.04498	4.70625	-
chr1	71529091	71529211	15.6576	5.1795	-
chr1	71529283	71529330	8.04677	4.65175	-
chr1	71529411	71529431	3.91507	3.0738	-
chr1	71529497	71529806	9.54429	3.50587	-
chr1	71530556	71530727	55.6036	5.70929	-
chr1	76253202	76253289	17.5758	5.04741	+
chr1	76254843	76255022	43.413	5.61176	+
chr1	76255656	76255741	10.2317	4.98375	+
chr1	76256972	76256984	6.23786	4.40693	+
chr1	76256987	76257022	15.6576	6.66918	+
chr1	76257145	76257257	15.4987	5.75929	+
chr1	76257865	76257900	15.234	5.6892	+
chr1	76257926	76257990	8.83487	3.92236	+
chr1	76259831	76259918	15.6576	5.76859	+
chr1	76260194	76260206	15.6576	5.19127	+
chr1	76260212	76260253	15.6576	6.2964	+
chr1	76260268	76260432	15.6576	6.93484	+
chr1	77556565	77556667	3.62091	3.74912	-
chr1	77557946	77558064	13.4799	5.37526	-
chr1	78028226	78028369	8.25639	4.74302	-
chr1	78030138	78030350	2.96647	3.40342	-
chr1	78161708	78161775	15.6576	6.24545	-
chr1	78161803	78162135	15.6576	7.50563	-
chr1	78162142	78162191	23.515	4.20558	-
chr1	78162696	78162765	6.04282	3.54432	-
chr1	78340787	78340902	13.8227	5.56094	+
chr1	78340942	78341163	15.6576	6.76651	+
chr1	78341241	78341371	15.6576	6.8855	+
chr1	78342973	78343134	240.168	6.0098	+
chr1	78343217	78343298	15.6576	6.91729	+
chr1	78343396	78343517	15.6576	5.76394	+
chr1	78343553	78343689	14.7057	4.73833	+
chr1	78343777	78343815	12.0486	4.35979	+
chr1	78409774	78409943	15.4298	5.20398	-
chr1	78409961	78410033	7.48711	3.44515	-
chr1	78410579	78410614	3.21674	2.48884	-
chr1	78410650	78410750	4.62925	1.75086	-
chr1	78410865	78410999	5.03189	2.32695	-
chr1	78411582	78411677	4.92511	1.9719	-
chr1	78412382	78412569	5.28973	1.99355	-
chr1	78413176	78413339	13.3094	4.13246	-
chr1	78413419	78413465	3.27424	1.91238	-
chr1	78413505	78413559	5.17853	2.26465	-
chr1	78413780	78413862	15.6576	6.50358	-
chr1	78413878	78413978	12.9069	4.67825	-
chr1	78413987	78414190	10.7489	4.1258	-
chr1	78414205	78414259	10.5256	3.72657	-
chr1	78414359	78414403	5.76293	3.38602	-
chr1	78414747	78414795	4.567	4.00016	-
chr1	78481965	78482119	5.45856	3.45241	+
chr1	78482600	78482736	4.83321	3.29147	+
chr1	78482877	78482975	6.0895	3.70983	+
chr1	79004324	79004408	3.94315	3.84358	+
chr1	79004950	79005042	6.01338	4.34294	+
chr1	79005298	79005401	4.65838	4.01653	+
chr1	84330747	84330892	4.24952	3.92292	-
chr1	84332941	84333070	2.20492	3.05686	-
chr1	84599233	84599361	3.75	3.68614	+
chr1	84599848	84599937	4.56877	4.00634	+
chr1	84702749	84702900	5.08964	4.13991	+
chr1	85110012	85110120	7.17051	4.44794	-
chr1	85110216	85110470	12.2995	5.31921	-
chr1	85111472	85111550	15.6576	5.63219	-
chr1	85111734	85111994	15.3764	6.35014	-
chr1	85112656	85112928	13.888	5.38338	-
chr1	85112979	85112984	2.1064	3.12536	-
chr1	85277353	85277478	31.2228	5.15714	-
chr1	85277621	85277879	14.6599	5.43018	-
chr1	85278679	85278780	15.6576	6.07947	-
chr1	85278827	85278908	15.6576	7.90781	-
chr1	85279024	85279166	143.772	6.01517	-
chr1	85279268	85279378	54.7447	5.49115	-
chr1	85279409	85279418	8.36041	3.22436	-
chr1	85331619	85331783	15.6576	4.85809	-
chr1	85346263	85346333	6.01984	4.36261	-
chr1	85483777	85483815	2.02068	2.38839	-
chr1	85484168	85484216	3.06319	2.77906	-
chr1	85484449	85484575	15.6576	7.17852	-
chr1	85484584	85484632	6.34305	4.41426	-
chr1	85484666	85484746	11.0982	4.26378	-
chr1	85488325	85488464	2.26141	2.12642	-
chr1	85640000	85640084	5.92738	4.2916	-
chr1	85640134	85640217	6.33756	4.41513	-
chr1	85640260	85640511	10.9379	4.3522	-
chr1	85645797	85645890	4.45151	3.99078	-
chr1	85718008	85718134	6.13807	4.29985	-
chr1	85733111	85733262	3.04506	2.81606	-
chr1	86048944	86049014	2.29981	2.48235	+
chr1	86049244	86049336	4.61524	1.63314	+
chr1	86119465	86119572	5.02805	3.31806	-
chr1	86119583	86119692	7.76679	3.83793	-
chr1	87570796	87570978	15.6576	6.18677	+
chr1	87571703	87571803	15.6576	4.34194	+
chr1	87571839	87571919	12.3583	4.37749	+
chr1	87571977	87572038	6.14128	4.37687	+
chr1	87572164	87572243	15.6576	4.42922	+
chr1	87573482	87573626	14.1424	4.88815	+
chr1	87574371	87574476	15.3148	5.96967	+
chr1	87574981	87575094	15.6576	7.08865	+
chr1	87575397	87575635	15.6576	7.72077	+
chr1	87811014	87811127	8.89377	4.82749	+
chr1	87811152	87811242	2.48004	3.33684	+
chr1	89279238	89279419	4.9176	3.44456	+
chr1	89287623	89287688	4.67818	4.00737	+
chr1	89289990	89290071	2.00608	2.65535	+
chr1	89300481	89300653	10.3908	2.46757	+
chr1	89301286	89301409	5.76872	3.66628	+
chr1	89318708	89318800	5.08077	4.14416	-
chr1	89445644	89445841	11.994	5.27456	-
chr1	89446006	89446070	3.93838	3.81939	-
chr1	89851592	89851687	6.55209	4.44869	+
chr1	89851688	89851836	5.13652	3.77324	+
chr1	90061509	90061686	2.8478	3.35866	+
chr1	90062321	90062394	2.39175	3.26629	+
chr1	90180802	90180918	5.05221	2.90635	+
chr1	90401265	90401404	17.1347	3.9894	+
chr1	90401411	90401549	15.3661	5.4657	+
chr1	90493279	90493407	2.16068	2.1551	+
chr1	91380959	91381067	2.86278	2.7326	-
chr1	92648953	92649054	4.16327	3.80399	+
chr1	92977400	92977546	2.9111	2.0853	-
chr1	93128583	93128706	2.6056	3.31606	-
chr1	93128718	93128879	2.90651	3.47084	-
chr1	93307929	93308041	4.63509	3.23559	-
chr1	93603124	93603254	2.37737	2.81556	+
chr1	93603312	93603380	2.66427	2.6551	+
chr1	93615371	93615422	2.09431	3.08316	-
chr1	93615606	93615718	9.52348	4.91295	-
chr1	93615742	93615837	6.76913	4.50532	-
chr1	93617511	93617543	2.66964	2.65843	-
chr1	93617652	93617761	15.6576	6.93235	-
chr1	93826258	93826383	15.6576	6.26629	+
chr1	93826440	93826490	3.61031	2.57843	+
chr1	93826595	93826659	2.0508	1.76124	+
chr1	93826812	93826880	6.2215	3.35083	+
chr1	93827092	93827226	12.6213	4.96625	+
chr1	93828012	93828127	3.47071	2.8293	+
chr1	94016868	94016957	2.18427	3.18454	+
chr1	94018016	94018158	75.0166	5.88126	+
chr1	94018367	94018542	15.6576	8.46292	+
chr1	94018554	94018589	15.6576	6.0749	+
chr1	94019174	94019179	12.1499	5.24373	+
chr1	94019260	94019415	15.6576	8.46516	+
chr1	94019440	94019494	15.6576	6.4617	+
chr1	94027377	94027490	10.2485	3.68312	-
chr1	94064484	94064533	2.64056	2.16833	-
chr1	94064557	94064670	14.5163	3.66901	-
chr1	94064825	94064939	7.00784	3.09524	-
chr1	94071710	94071826	2.08243	2.00737	-
chr1	94131239	94131353	2.60107	1.26201	-
chr1	94234168	94234274	2.90909	3.46842	-
chr1	94312129	94312280	6.24664	4.35125	-
chr1	94638747	94638852	26.4995	5.01173	-
chr1	94638880	94639190	30.3507	5.40173	-
chr1	94639212	94639386	27.0407	5.97363	-
chr1	94994891	94995148	3.91228	0.629893	-
chr1	94995705	94995785	11.0981	1.34162	-
chr1	94995803	94996004	34.4814	2.81003	-
chr1	95000271	95000364	2.25589	1.03575	-
chr1	95362549	95362792	10.1649	5.02333	-
chr1	97271349	97271396	2.09727	3.08316	+
chr1	97271409	97271473	4.45322	3.97862	+
chr1	97272047	97272097	4.16596	3.89089	+
chr1	97272146	97272259	14.607	5.57462	+
chr1	97279737	97279946	5.31644	3.18698	+
chr1	100388559	100388665	2.075	2.24695	+
chr1	100389174	100389334	2.1158	2.05043	+
chr1	100389435	100389559	6.35899	4.39026	+
chr1	100496329	100496460	3.43314	2.50326	+
chr1	100533541	100533738	3.5244	3.68374	+
chr1	100547862	100547948	10.9836	4.25874	+
chr1	100547979	100548107	2.05858	1.88235	+
chr1	100548257	100548359	3.26006	3.50531	+
chr1	100548456	100548574	4.44163	2.34186	+
chr1	100549332	100549426	7.4186	3.2965	-
chr1	101338619	101338902	15.6576	6.72383	-
chr1	101339035	101339064	5.63808	4.26286	-
chr1	101339546	101339647	15.5541	4.69053	-
chr1	101548578	101548696	11.058	3.78497	+
chr1	107951697	107951791	3.1197	3.50326	+
chr1	107951838	107951947	4.38366	3.53845	+
chr1	107951999	107952076	3.00706	3.53254	+
chr1	108114042	108114133	3.62809	3.75037	-
chr1	108114147	108114228	2.81575	3.37871	-
chr1	108678328	108678485	3.54166	3.5665	-
chr1	109181233	109181377	2.4815	3.31606	+
chr1	109242719	109242975	15.6576	6.87834	+
chr1	109242992	109243215	15.6576	6.76267	+
chr1	109243938	109243983	13.8139	4.63235	+
chr1	109445738	109445851	2.66169	2.67729	+
chr1	109472671	109472896	15.6576	6.07025	+
chr1	109472935	109472975	8.73511	3.46081	+
chr1	109512861	109512952	15.6576	6.75942	-
chr1	109513068	109513118	15.6576	5.73503	-
chr1	109513129	109513222	15.6576	7.50376	-
chr1	109513637	109513959	14.6435	6.21213	-
chr1	109605169	109605309	14.4209	5.99799	-
chr1	109605311	109605492	15.6576	5.91439	-
chr1	109605872	109605937	2.29698	1.61646	-
chr1	109606720	109606775	4.41233	3.19472	-
chr1	109606809	109606904	9.28065	4.2335	-
chr1	109606920	109607023	15.6576	7.19859	-
chr1	109607153	109607209	6.76418	3.62178	-
chr1	109816557	109816794	11.7634	3.6049	+
chr1	109817335	109817414	15.6576	4.97702	+
chr1	109817438	109817441	2.69508	3.39573	+
chr1	109817465	109817566	13.5732	5.47711	+
chr1	109817700	109817731	5.39328	4.21974	+
chr1	109817759	109817798	5.25844	3.34294	+
chr1	109817926	109818078	14.1539	6.0274	+
chr1	109818231	109818319	6.87445	4.47467	+
chr1	109852239	109852293	5.18474	4.18694	-
chr1	109852365	109852599	9.10901	4.9061	-
chr1	109852644	109852751	15.6576	3.89644	-
chr1	109852904	109852951	4.55482	4.02558	-
chr1	109856255	109856356	2.20633	3.12787	-
chr1	110039058	110039296	5.21625	3.98499	+
chr1	110041915	110042023	3.1113	3.57013	+
chr1	110042873	110043066	3.51815	3.71974	+
chr1	110048102	110048220	7.62062	4.64161	-
chr1	110128938	110128968	8.09247	3.8807	+
chr1	110129349	110129418	13.9539	5.69822	+
chr1	110134837	110134877	15.6576	8.55469	+
chr1	110134966	110135261	74.7872	7.36479	+
chr1	110135828	110136170	15.6576	7.75107	+
chr1	110136187	110136314	15.6576	9.0593	+
chr1	110163414	110163501	6.55705	3.63542	+
chr1	110163847	110163886	2.01071	2.97809	+
chr1	110164492	110164561	2.40157	3.26915	+
chr1	110164581	110164699	5.438	3.38572	+
chr1	110169946	110170020	2.82818	3.32138	+
chr1	110173825	110173932	15.6576	7.74793	+
chr1	110174180	110174208	4.15224	3.93271	+
chr1	110174427	110174483	5.60915	4.20664	+
chr1	110174607	110174662	6.02875	4.296	+
chr1	110464667	110464718	5.29198	4.2004	+
chr1	110464735	110464798	7.12367	4.55832	+
chr1	110465313	110465427	15.6576	6.70718	+
chr1	110465475	110465563	11.1301	5.13219	+
chr1	110564731	110564926	13.1203	4.57387	+
chr1	110565638	110565683	3.41071	3.68133	+
chr1	110565909	110565974	2.68782	2.00839	+
chr1	110566223	110566345	12.2604	5.22327	+
chr1	111725512	111725580	2.99458	3.55302	+
chr1	111726082	111726146	4.29083	3.92645	+
chr1	111727120	111727310	15.6576	5.85118	+
chr1	111727492	111727579	15.6576	6.26544	+
chr1	111991518	111991650	3.34722	2.90458	-
chr1	112267144	112267218	3.01088	3.47381	-
chr1	112269236	112269412	5.60938	3.23619	-
chr1	112281120	112281229	2.70379	3.38965	-
chr1	113000798	113000896	2.23293	3.09815	+
chr1	113001133	113001217	4.35061	3.96626	+
chr1	113002513	113002814	4.32333	3.24557	+
chr1	113212885	113212975	3.64029	2.96842	+
chr1	113214039	113214189	2.86908	1.95148	+
chr1	113243932	113244040	2.36811	2.57068	-
chr1	113247218	113247316	8.48666	3.94409	-
chr1	113247499	113247636	3.17366	2.26053	-
chr1	113253016	113253092	2.51823	3.2311	-
chr1	113564152	113564366	2.19335	2.85525	+
chr1	113634778	113635066	3.01857	2.26915	+
chr1	113965064	113965264	10.8411	5.16676	+
chr1	113965454	113965555	11.9911	5.23671	+
chr1	114226752	114226932	15.6576	6.24492	+
chr1	114227022	114227131	15.6576	7.55824	+
chr1	114228378	114228514	15.6576	6.11312	+
chr1	114304619	114304770	15.6576	5.33183	-
chr1	114304846	114304929	13.0967	4.46829	-
chr1	114304959	114305074	13.0571	4.18004	-
chr1	114305986	114306070	15.563	5.80639	-
chr1	114306128	114306274	15.6576	5.84318	-
chr1	114306700	114306726	2.69962	3.44728	-
chr1	114306792	114306870	15.6576	5.7723	-
chr1	114306888	114306900	3.51258	3.70607	-
chr1	114506284	114506327	2.39705	3.26629	+
chr1	114507586	114507637	3.54607	3.71032	+
chr1	114515742	114515794	2.90979	3.44535	+
chr1	114516534	114516576	4.133	3.88116	+
chr1	114517226	114517327	15.6576	8.1867	+
chr1	114517476	114517719	15.6576	8.68226	+
chr1	114517728	114517833	15.6576	6.24585	+
chr1	114517869	114517931	15.6576	6.28529	+
chr1	114519290	114519324	15.6576	5.58951	+
chr1	114519682	114519853	15.6576	7.20519	+
chr1	114519870	114519971	15.6576	8.22236	+
chr1	114520010	114520146	15.6576	6.70901	+
chr1	114520172	114520263	15.6576	7.8546	+
chr1	114520330	114520369	15.6576	6.68115	+
chr1	114520375	114520406	15.6576	6.31937	+
chr1	114935448	114935613	14.7742	5.88003	-
chr1	114936196	114936315	15.3549	5.95629	-
chr1	114936482	114936588	15.6576	5.38922	-
chr1	115249854	115250026	5.0172	3.8016	-
chr1	115250165	115250292	2.57412	3.22217	-
chr1	115259946	115260138	3.4318	1.60696	-
chr1	115260331	115260365	2.89415	3.45231	-
chr1	115260405	115260539	16.7248	3.85883	-
chr1	116525052	116525199	2.01462	2.36761	+
chr1	116941246	116941297	10.713	5.07726	+
chr1	116941308	116941387	9.74291	4.95478	+
chr1	116942123	116942166	15.6576	5.33478	+
chr1	116943482	116943593	14.8318	5.97391	+
chr1	116944201	116944277	15.6576	7.83611	+
chr1	116946592	116946596	15.6576	5.30646	+
chr1	116947043	116947276	246.263	8.16513	+
chr1	117117067	117117184	2.49544	3.30529	-
chr1	117117245	117117334	2.00146	2.97381	-
chr1	117135937	117136006	2.19504	3.13477	-
chr1	117181420	117181667	7.8694	4.29811	-
chr1	117208536	117208667	2.19792	3.1551	-
chr1	117456052	117456184	12.2035	3.53452	+
chr1	117529726	117529795	15.6576	6.6279	+
chr1	117529864	117530068	14.6881	7.4027	+
chr1	117530214	117530271	6.2521	2.50717	+
chr1	117530312	117530369	15.6576	3.91717	+
chr1	117531405	117531451	8.13805	3.12536	+
chr1	117531504	117531659	23.1543	4.5648	+
chr1	117531911	117531963	11.781	3.8559	+
chr1	117532493	117532608	16.4759	3.6021	+
chr1	117532848	117532966	14.4085	5.3755	+
chr1	118066281	118066448	15.6576	7.27828	+
chr1	118068773	118068889	15.6576	6.78757	+
chr1	118068897	118068959	6.2568	3.54505	+
chr1	118070672	118070740	2.70572	3.36761	+
chr1	118417895	118418057	6.2096	4.23866	-
chr1	120162081	120162278	2.91141	3.44075	-
chr1	120162861	120162999	15.6576	4.43897	-
chr1	120163360	120163432	6.96653	4.5355	-
chr1	120454939	120455255	22.3783	6.44616	-
chr1	120455931	120456058	15.6576	6.10951	-
chr1	120456184	120456231	13.1655	3.66141	-
chr1	120456794	120456976	15.6576	6.28686	-
chr1	120457010	120457072	15.6576	5.35046	-
chr1	120457205	120457240	12.4109	5.28405	-
chr1	120457321	120457547	15.6576	6.4496	-
chr1	120458716	120458807	3.828	3.38542	-
chr1	120459658	120459776	3.1119	3.54723	-
chr1	120510806	120510856	3.86766	3.81018	-
chr1	120512132	120512197	4.14893	3.35707	-
chr1	120551668	120551793	6.24932	4.39206	-
chr1	144898371	144898538	5.18771	4.15259	-
chr1	144900831	144900994	2.89751	2.93635	-
chr1	144901860	144901960	2.60599	3.35759	-
chr1	144902512	144902690	8.59081	4.17898	-
chr1	145116509	145116587	3.13757	2.83934	+
chr1	145116650	145116745	3.71043	2.1551	+
chr1	145269606	145269736	8.70564	4.81719	+
chr1	145282046	145282149	12.8512	4.64083	+
chr1	145283642	145283746	17.4262	3.42768	+
chr1	145284158	145284206	2.8123	3.42726	+
chr1	145285913	145286065	3.49963	3.52899	+
chr1	145287347	145287425	5.2235	4.04432	+
chr1	145287890	145287904	2.20294	2.44728	+
chr1	145287992	145288029	3.52932	3.70819	+
chr1	145288064	145288170	15.6576	5.67283	+
chr1	145289058	145289298	25.1726	3.15763	+
chr1	145439473	145439587	7.95212	4.67851	+
chr1	145440065	145440137	2.97595	2.74228	+
chr1	145441190	145441264	3.16954	2.84782	+
chr1	145442040	145442133	2.8318	2.12536	+
chr1	145442510	145442579	2.01114	2.37749	+
chr1	145499209	145499293	2.2838	3.21283	+
chr1	145528723	145528826	6.24659	4.39116	+
chr1	145582051	145582148	5.83111	4.30258	+
chr1	145592908	145593042	2.59547	3.35759	-
chr1	147228778	147228871	2.50028	3.28884	-
chr1	149291485	149291610	4.35747	3.94535	+
chr1	150237849	150237931	4.12536	1.83919	-
chr1	150237996	150238189	5.60642	2.9433	-
chr1	150238811	150238880	2.1064	3.12536	-
chr1	150528122	150528385	4.62853	3.94869	-
chr1	150548184	150548419	9.46567	3.17188	-
chr1	150548932	150549020	6.36228	3.00326	-
chr1	150597393	150597498	3.22683	2.19207	-
chr1	150597605	150597699	7.70894	4.66628	-
chr1	151006721	151006851	6.79446	4.09931	+
chr1	151007721	151007964	15.519	6.70072	+
chr1	151008006	151008168	15.6576	6.15079	+
chr1	151023545	151023612	5.50668	4.22657	-
chr1	151024295	151024462	16.2781	4.34857	-
chr1	151024501	151024559	12.9167	5.34462	-
chr1	151221820	151221935	3.89074	1.93636	+
chr1	151239790	151239919	33.8262	5.01676	+
chr1	151262711	151262807	6.2463	3.57668	+
chr1	151375226	151375310	3.20895	3.59958	-
chr1	151376518	151376693	8.47304	3.95478	-
chr1	151376790	151376874	5.34513	3.39446	-
chr1	151421389	151421695	5.5152	3.57813	-
chr1	151510400	151510544	4.04992	3.84934	+
chr1	151585660	151585810	7.5163	4.61805	+
chr1	151666347	151666433	4.03759	3.88481	+
chr1	151669452	151669533	4.24131	3.94758	+
chr1	151670065	151670246	10.3176	4.471	+
chr1	151846550	151846669	6.96131	3.6941	-
chr1	151846679	151846789	3.84016	3.44702	-
chr1	151955396	151955584	3.54684	0.304809	-
chr1	152005000	152005119	5.36158	1.65431	-
chr1	152281278	152281407	2.81331	3.36511	+
chr1	152958039	152958136	3.00233	3.52857	+
chr1	153004809	153004885	10.924	5.10631	+
chr1	153005123	153005257	15.6576	7.01939	+
chr1	153393260	153393285	2.09431	3.08316	+
chr1	153517429	153517841	10.7144	5.06997	-
chr1	153517864	153517985	14.8168	5.58097	-
chr1	153518128	153518197	3.82275	2.64473	-
chr1	153533836	153534068	2.49514	1.59158	-
chr1	153579384	153579505	5.61661	3.8201	-
chr1	153579530	153579711	3.78253	3.66585	-
chr1	153581262	153581350	2.05574	1.83971	-
chr1	153581533	153581608	2.90922	3.47381	-
chr1	153586743	153586962	10.4046	2.64	-
chr1	153587001	153587212	8.07865	2.58823	-
chr1	153587962	153588021	8.01518	3.41104	-
chr1	153588034	153588124	15.6576	6.54887	-
chr1	153778575	153778708	10.3378	4.6009	-
chr1	153778954	153779126	10.8057	4.74743	-
chr1	153779339	153779398	3.41781	3.68454	-
chr1	153782506	153782634	13.9812	4.56943	-
chr1	153931839	153931959	3.12921	2.57626	-
chr1	154129781	154129874	2.06394	1.93862	-
chr1	154129933	154130014	2.18605	2.47702	-
chr1	154130040	154130154	3.26883	2.79985	-
chr1	154179218	154179390	4.1405	3.34232	-
chr1	154179421	154179542	4.79049	2.78856	-
chr1	154179637	154179730	4.83527	3.28466	-
chr1	154235644	154235774	3.17159	2.77819	+
chr1	154235840	154235956	7.30245	4.58822	+
chr1	154407337	154407425	3.32447	3.63477	+
chr1	154412292	154412397	12.3902	3.9128	+
chr1	154521095	154521154	8.13072	4.73969	-
chr1	154521577	154521692	15.6576	7.29024	-
chr1	154521958	154522067	8.63341	4.76665	-
chr1	154522216	154522231	2.08113	3.0738	-
chr1	154522291	154522322	2.79184	3.47702	-
chr1	154522474	154522526	3.73196	3.68694	-
chr1	154556722	154556862	2.5691	1.87667	-
chr1	154916937	154917000	6.87408	4.48499	-
chr1	154917182	154917342	11.3863	5.11867	-
chr1	154929919	154929996	3.54659	2.94535	-
chr1	154935116	154935181	4.86164	3.68694	-
chr1	154935223	154935301	11.4225	4.29703	-
chr1	154935324	154935693	12.7567	3.26491	-
chr1	154936128	154936219	9.65451	4.08913	-
chr1	154941145	154941213	2.19508	2.47809	-
chr1	154942071	154942170	2.33259	2.14613	-
chr1	154942178	154942279	5.19058	4.16628	-
chr1	154942285	154942399	4.87003	3.70392	-
chr1	154989484	154989618	4.63512	3.2311	+
chr1	155017757	155017849	15.6576	4.96531	-
chr1	155018030	155018109	8.97605	4.8738	-
chr1	155033697	155033890	15.6576	7.41337	+
chr1	155034217	155034599	15.6576	7.1993	+
chr1	155111224	155111318	2.30029	3.18133	+
chr1	155178403	155178519	3.96712	2.39437	-
chr1	155217019	155217161	15.6576	8.05574	-
chr1	155217170	155217276	15.6576	6.83964	-
chr1	155217315	155217442	15.6576	7.90551	-
chr1	155221683	155221696	5.07551	4.12874	-
chr1	155223415	155223492	15.6576	6.25937	-
chr1	155223896	155223970	15.3549	5.59506	-
chr1	155238815	155238973	3.54082	2.53462	-
chr1	155282933	155283078	5.65782	3.55661	+
chr1	155283093	155283227	15.8551	2.79516	+
chr1	155300734	155300887	7.78571	4.67381	+
chr1	155305071	155305134	15.6576	6.36776	-
chr1	155305169	155305328	15.6576	6.41201	-
chr1	155305636	155305685	7.32561	2.71019	-
chr1	155306098	155306196	4.133	3.88116	-
chr1	155448340	155448449	6.15089	4.3601	-
chr1	155616477	155616561	2.89687	3.3738	-
chr1	155646616	155646769	4.24928	3.92726	-
chr1	155936682	155936856	3.13809	3.33316	-
chr1	155944340	155944384	2.08113	3.0738	-
chr1	155944556	155944691	4.65173	3.96992	-
chr1	156107795	156108061	15.6576	5.63898	+
chr1	156108093	156108136	2.86851	2.35365	+
chr1	156109121	156109166	3.19047	2.19765	+
chr1	156109224	156109335	15.6576	5.90384	+
chr1	156109485	156109730	9.18226	2.80051	+
chr1	156213632	156213811	2.85727	2.0092	-
chr1	156223771	156224033	2.08735	1.9248	-
chr1	156436129	156436244	2.47264	2.37912	-
chr1	156437042	156437164	3.40121	3.04215	-
chr1	156437308	156437391	4.76322	4.08039	-
chr1	156446023	156446225	4.02871	3.33871	-
chr1	156495846	156496061	3.62199	3.26239	-
chr1	156518644	156518777	5.66112	3.88146	-
chr1	156519499	156519690	2.22398	1.88046	-
chr1	156884874	156884975	2.79601	3.42381	+
chr1	156905272	156905390	6.90342	4.33682	-
chr1	156905436	156905600	12.6498	4.80827	-
chr1	156905607	156905650	2.89415	3.45231	-
chr1	157091176	157091341	3.34507	2.70401	-
chr1	157092090	157092175	2.31161	2.42726	-
chr1	157093998	157094035	3.84043	3.79985	-
chr1	157094058	157094098	2.0033	2.39206	-
chr1	157094142	157094267	11.9189	4.35759	-
chr1	157094409	157094545	8.88767	3.37833	-
chr1	157975463	157975585	15.202	4.31606	+
chr1	157998021	157998103	3.22011	3.58132	+
chr1	158030154	158030292	3.62757	3.75475	+
chr1	159024758	159024926	6.12249	3.06089	+
chr1	159888199	159888330	5.86802	2.77128	-
chr1	159888401	159888485	2.00118	2.39206	-
chr1	159912516	159912628	2.0963	3.10886	-
chr1	159912681	159912741	2.81515	3.40162	-
chr1	159912795	159912919	6.46755	3.59233	-
chr1	159913059	159913134	2.69983	3.41104	-
chr1	159994919	159995172	3.26786	3.59233	-
chr1	160067348	160067500	6.24334	4.36761	-
chr1	160184839	160184974	4.61212	2.4446	+
chr1	160185082	160185144	4.25791	3.84743	+
chr1	160209199	160209311	3.10591	3.58132	-
chr1	160259421	160259551	15.6576	6.2956	-
chr1	160259801	160259942	22.9445	5.5533	-
chr1	160299155	160299264	3.82866	2.34229	-
chr1	160299868	160299922	2.48305	2.58409	-
chr1	160299958	160300056	3.6298	2.3235	-
chr1	160387483	160387597	4.57198	4.00326	+
chr1	160389112	160389228	7.09693	4.5355	+
chr1	160398248	160398347	12.2454	4.38625	+
chr1	160966920	160967019	15.6576	4.15384	-
chr1	160967454	160967686	6.61971	3.81205	-
chr1	160968891	160968926	2.51343	3.32699	-
chr1	160968958	160969042	4.03671	3.09913	-
chr1	160969063	160969168	14.3304	5.74891	-
chr1	161042009	161042083	3.42417	3.6551	-
chr1	161042135	161042268	10.0691	5.00634	-
chr1	161131684	161131806	3.23112	2.49635	+
chr1	161134051	161134155	2.38842	3.29985	+
chr1	161184078	161184183	3.54777	2.93636	+
chr1	162330438	162330615	4.47458	3.93239	+
chr1	162492949	162493101	61.4948	5.19079	+
chr1	162493570	162493646	3.89458	1.59941	+
chr1	162494532	162494744	7.07007	4.22705	+
chr1	162495769	162495827	4.45941	3.95257	+
chr1	162495915	162495975	2.14666	2.09878	+
chr1	162496269	162496343	7.36906	4.61386	+
chr1	162496361	162496433	4.28697	2.93106	+
chr1	162496966	162497039	2.4332	1.75142	+
chr1	162497054	162497134	4.99201	2.59495	+
chr1	162497144	162497210	2.42605	1.52807	+
chr1	162497322	162497494	7.78145	4.39998	+
chr1	162497535	162497579	3.63937	3.63133	+
chr1	162498384	162498452	8.21739	3.41571	+
chr1	162498471	162498488	5.16513	4.14419	+
chr1	162498965	162499056	15.6576	7.23903	+
chr1	162499088	162499116	7.72562	4.63434	+
chr1	162499233	162499399	15.3931	6.17096	+
chr1	162562566	162562922	15.0184	5.37692	+
chr1	162563772	162563832	3.41311	3.67729	+
chr1	162563850	162563907	4.24879	3.9028	+
chr1	162564255	162564362	8.46747	4.76558	+
chr1	162564858	162564993	11.9707	5.19883	+
chr1	162771413	162771509	2.19079	3.1634	+
chr1	162782317	162782410	3.42836	3.65007	+
chr1	164694708	164694794	2.29368	3.22354	+
chr1	164789195	164789297	5.80235	4.33191	+
chr1	165696668	165696790	3.32238	1.65512	-
chr1	165696838	165697052	4.39309	2.96562	-
chr1	165697068	165697128	2.67957	2.6551	-
chr1	165807939	165808082	3.6268	2.3293	+
chr1	165868065	165868142	5.30833	4.1576	+
chr1	165868157	165868223	3.63218	3.7311	+
chr1	165868242	165868318	2.62205	1.98065	+
chr1	165869265	165869404	2.72568	3.23128	+
chr1	165877773	165877886	3.73297	3.02107	+
chr1	167386843	167386942	2.29728	3.2004	+
chr1	167391156	167391354	12.8594	5.07082	+
chr1	167391426	167391515	13.8289	4.53476	+
chr1	167394364	167394383	5.43239	4.22969	+
chr1	167394422	167394497	15.5749	5.70015	+
chr1	167394539	167394603	10.4925	5.05543	+
chr1	167394632	167394647	2.75375	2.70607	+
chr1	167394862	167394997	14.525	4.47585	+
chr1	167395031	167395060	4.74788	4.0738	+
chr1	167395128	167395232	13.7584	4.53712	+
chr1	167395249	167395294	8.5619	4.80394	+
chr1	167395499	167395642	14.305	5.7152	+
chr1	167396380	167396512	8.89901	4.71283	+
chr1	167511311	167511426	15.6576	5.65822	-
chr1	167743540	167743694	15.6576	5.9269	+
chr1	167743709	167743800	15.6576	6.84616	+
chr1	167743823	167744105	16.649	5.37662	+
chr1	167757324	167757510	32.5507	5.34576	+
chr1	167758216	167758277	2.33287	2.16979	+
chr1	167956770	167956847	4.05056	3.85948	+
chr1	167965632	167965791	2.69392	2.88011	+
chr1	168034896	168034986	9.86058	4.96517	+
chr1	168044678	168044707	14.3425	5.46829	+
chr1	168044749	168044966	15.0081	7.08269	+
chr1	168045010	168045064	15.6576	6.68083	+
chr1	168201591	168201646	2.49544	3.30529	+
chr1	168201880	168201977	10.7994	4.21591	+
chr1	168202449	168202486	2.29679	3.26286	+
chr1	168202732	168202818	4.59484	3.60407	+
chr1	168202843	168202940	2.00766	2.4028	+
chr1	168204370	168204421	3.40958	3.6551	+
chr1	168205825	168205859	2.9652	2.72354	+
chr1	168211745	168211820	7.93449	4.70761	+
chr1	168211883	168212085	13.2468	5.39123	+
chr1	168212197	168212260	3.5344	2.96734	+
chr1	169100869	169101151	217.555	6.70528	+
chr1	169101164	169101165	15.6576	7.17847	+
chr1	169101173	169101254	15.6576	8.21243	+
chr1	169101289	169101584	223.572	6.84839	+
chr1	169101623	169101776	15.6576	7.64336	+
chr1	169101816	169101859	15.6576	6.55292	+
chr1	169434956	169435050	2.40048	3.15007	-
chr1	169890492	169890580	7.99253	3.8612	-
chr1	169890644	169890791	11.0305	5.09853	-
chr1	171526770	171527010	5.14389	2.21527	+
chr1	171527452	171527583	7.11754	4.32511	+
chr1	171561440	171561482	2.22854	1.97381	+
chr1	171561587	171561737	6.35687	3.20631	+
chr1	171562065	171562164	14.7803	4.70265	+
chr1	171562185	171562211	2.27559	2.52956	+
chr1	171562294	171562396	13.2847	4.52956	+
chr1	171669833	171669940	2.57582	2.61209	-
chr1	171672987	171673044	4.25648	3.88481	-
chr1	171673209	171673315	15.6576	4.77668	-
chr1	171765930	171766009	3.32447	3.63477	+
chr1	171766124	171766229	4.45322	3.97862	+
chr1	171766507	171766693	10.257	4.99713	+
chr1	172062171	172062423	2.54241	2.53692	+
chr1	172379357	172379467	3.51293	3.71283	+
chr1	172380072	172380235	2.60425	3.36136	+
chr1	172410659	172410863	4.97329	3.17003	-
chr1	173391185	173391294	2.00125	3.02358	-
chr1	173391754	173391827	2.44236	2.94758	-
chr1	173457832	173457918	2.08836	3.08132	+
chr1	173834756	173834982	12.361	4.61308	-
chr1	173901218	173901357	3.13258	3.38866	-
chr1	173905942	173906045	4.96518	3.02677	-
chr1	174259134	174259265	3.93286	3.83061	+
chr1	174259287	174259385	2.69643	3.41104	+
chr1	174466612	174466808	3.32883	3.62178	+
chr1	174514955	174515046	2.90922	3.47381	+
chr1	174960946	174961096	6.77884	3.59051	+
chr1	174964270	174964397	4.64139	3.98258	+
chr1	175127086	175127226	3.45166	2.90987	-
chr1	175129217	175129328	4.93792	3.31271	-
chr1	175129471	175129624	3.42661	2.79756	-
chr1	178061522	178061626	3.52551	3.67486	-
chr1	178425360	178425432	7.57928	3.79728	+
chr1	178425475	178425670	12.3177	6.13424	+
chr1	178436765	178436968	7.07552	3.9651	+
chr1	178437044	178437148	10.3901	4.16505	+
chr1	178446509	178446710	2.10739	2.0173	+
chr1	178447156	178447249	7.53429	3.29452	+
chr1	178875930	178876003	2.07959	3.12439	+
chr1	178885807	178885931	11.2435	5.10972	+
chr1	178886043	178886190	19.2709	4.97247	+
chr1	178886236	178886281	4.56067	4.05136	+
chr1	178887412	178887431	4.16596	3.89089	+
chr1	178887476	178887654	12.9087	3.77389	+
chr1	178887709	178887727	3.92372	3.83934	+
chr1	178888150	178888293	15.6576	5.87399	+
chr1	178888459	178888544	15.6576	6.22877	+
chr1	178889069	178889194	15.6576	4.99869	+
chr1	179041605	179041743	3.42954	3.6551	+
chr1	179075313	179075456	2.86361	2.73185	-
chr1	179316753	179316834	10.669	4.21283	+
chr1	179317978	179318084	4.25235	3.88023	+
chr1	179319454	179319567	9.69249	4.98693	+
chr1	179320450	179320479	3.53272	3.70353	+
chr1	179320499	179320598	11.1053	4.24726	+
chr1	179322774	179322808	2.90323	3.42726	+
chr1	179322986	179323022	4.34607	3.96734	+
chr1	179323193	179323303	15.6127	5.05773	+
chr1	179323928	179324008	15.6576	5.25111	+
chr1	179324305	179324428	15.6576	7.56927	+
chr1	179324454	179324572	15.6576	6.77767	+
chr1	179324589	179324700	15.3471	5.66977	+
chr1	179324986	179325112	14.1879	5.85313	+
chr1	179325114	179325174	12.7374	5.31606	+
chr1	179327722	179327802	2.29606	3.2004	+
chr1	179810240	179810434	12.5072	4.46788	-
chr1	179813138	179813288	6.67957	4.11346	-
chr1	179814021	179814175	15.6576	5.46249	-
chr1	180080280	180080350	2.0992	3.03155	+
chr1	180081203	180081252	6.97292	4.53204	+
chr1	180081261	180081296	4.35417	3.95643	+
chr1	180081752	180081864	13.5259	5.47387	+
chr1	180081888	180081985	15.6576	7.35487	+
chr1	180081997	180082191	15.2498	6.17293	+
chr1	180166606	180166621	4.31158	3.14419	+
chr1	180166663	180166681	5.16046	4.17814	+
chr1	180166705	180166962	15.6576	5.77379	+
chr1	180166971	180167030	9.90553	4.12536	+
chr1	180167338	180167399	9.43333	3.59354	+
chr1	180167715	180167867	15.6576	5.99132	+
chr1	180167878	180167913	7.61042	4.66029	+
chr1	180171444	180171598	2.50454	3.23128	+
chr1	180240433	180240491	6.33301	4.43409	-
chr1	180240505	180240584	15.6576	5.97729	-
chr1	180240990	180241176	12.5706	5.10825	-
chr1	180241224	180241239	2.89415	3.45231	-
chr1	180241343	180241416	3.71905	2.03623	-
chr1	180241520	180241527	2.89415	3.45231	-
chr1	180241535	180241554	4.16596	3.89089	-
chr1	180241654	180241731	15.2539	5.56376	-
chr1	180944113	180944224	2.16417	2.13155	-
chr1	181030788	181030911	15.6576	6.65101	+
chr1	181059237	181059436	2.09287	2.63679	+
chr1	182350985	182351046	3.00706	3.53254	-
chr1	182352347	182352565	26.5028	3.55556	-
chr1	182352792	182352875	10.3234	3.59294	-
chr1	182352957	182353057	15.6576	4.74781	-
chr1	182856513	182856758	11.4017	2.42666	+
chr1	183021271	183021404	2.78019	2.67486	+
chr1	183086147	183086246	2.40554	2.46734	+
chr1	183113334	183113392	5.06982	2.88777	+
chr1	183113419	183113474	7.41011	4.60698	+
chr1	183113481	183113681	14.9058	4.5598	+
chr1	183114331	183114351	2.07852	3.14419	+
chr1	183114454	183114550	11.7659	4.55421	+
chr1	183114564	183114657	15.6576	4.00532	+
chr1	183156485	183156571	2.67709	2.63133	+
chr1	183170540	183170638	2.25842	1.85125	+
chr1	183171795	183171900	2.10624	1.82403	+
chr1	183171923	183172021	9.83479	4.97636	+
chr1	183192178	183192255	6.96615	4.51855	+
chr1	183197253	183197425	5.72167	3.33366	+
chr1	183211282	183211407	11.6821	2.85125	+
chr1	183212584	183212837	12.1462	3.40506	+
chr1	183212898	183212919	2.24907	1.7215	+
chr1	183212927	183213007	9.97941	2.35335	+
chr1	183213160	183213202	4.53787	2.53847	+
chr1	183213204	183213286	10.962	2.91781	+
chr1	183213402	183213678	15.4361	2.2789	+
chr1	183442171	183442292	5.55046	2.81048	+
chr1	183521088	183521170	7.93661	4.6634	+
chr1	183521206	183521296	5.87505	4.31729	+
chr1	183521336	183521410	3.94492	3.71974	+
chr1	183521989	183522082	3.8353	3.02358	+
chr1	183522085	183522155	2.92445	2.79627	+
chr1	183522777	183523039	15.0497	5.04605	+
chr1	183523044	183523142	15.6576	5.61849	+
chr1	183523221	183523306	13.3627	4.39628	+
chr1	183596043	183596140	5.2936	4.20235	-
chr1	183896328	183896409	6.01338	4.34294	+
chr1	184356518	184356791	7.15963	4.08945	+
chr1	184589088	184589234	12.8748	5.45109	+
chr1	184589253	184589390	13.8758	5.63673	+
chr1	184659687	184659796	2.38393	2.55686	-
chr1	184661262	184661316	3.06319	2.77906	-
chr1	184661340	184661551	10.0465	2.81466	-
chr1	184662934	184663065	5.08876	3.01729	-
chr1	184760168	184760242	2.29547	3.22354	-
chr1	184760906	184761080	10.2016	4.39346	-
chr1	184763188	184763292	15.6576	5.43419	-
chr1	184763319	184763384	15.6576	4.95801	-
chr1	184763666	184763753	15.6576	6.45684	-
chr1	184763767	184763893	67.2703	5.33679	-
chr1	184763916	184763997	15.6576	5.64575	-
chr1	184763998	184764067	15.6576	5.86241	-
chr1	185071054	185071202	15.506	5.91127	+
chr1	185071258	185071318	4.45445	3.95091	+
chr1	185088195	185088314	6.34283	3.59096	-
chr1	185088329	185088464	2.92623	3.33633	-
chr1	185265550	185265590	15.2969	4.50131	-
chr1	185265987	185266158	70.5636	6.39862	-
chr1	185266171	185266220	15.6576	4.52709	-
chr1	185266329	185266626	15.6576	6.34672	-
chr1	185266939	185267053	38.7142	5.64446	-
chr1	185267059	185267125	19.648	2.66845	-
chr1	185268841	185268888	2.58284	1.76851	-
chr1	185276220	185276260	2.19737	2.47381	-
chr1	185276695	185276724	2.37407	2.55923	-
chr1	185283325	185283387	4.32978	3.16422	-
chr1	185283403	185283448	3.32794	2.92381	-
chr1	185284151	185284221	4.56965	2.37174	-
chr1	186641001	186641094	11.9217	5.30249	-
chr1	186642141	186642304	4.72342	3.17969	-
chr1	192985167	192985209	15.6576	6.09301	-
chr1	192985211	192985414	15.6576	8.7625	-
chr1	192997212	192997280	3.46493	2.85153	-
chr1	192998308	192998368	2.80426	3.4028	-
chr1	193054583	193054634	2.51543	2.96081	+
chr1	193055140	193055369	6.77363	3.62137	+
chr1	193056233	193056322	2.90149	3.49288	+
chr1	197475187	197475253	2.39758	3.20819	-
chr1	197479078	197479104	2.57912	2.61386	-
chr1	197479147	197479378	13.7834	5.86206	-
chr1	197479444	197479455	2.51343	3.32699	-
chr1	198288614	198288760	8.33645	3.85423	+
chr1	198288843	198288977	3.58709	2.7701	+
chr1	198289776	198289907	11.3148	4.26817	+
chr1	198289950	198290101	9.9657	4.96715	+
chr1	198848398	198848538	4.36871	3.91977	-
chr1	200375828	200375925	8.21108	3.4498	-
chr1	200375962	200376010	3.32186	3.56258	-
chr1	200376015	200376079	3.69616	3.79627	-
chr1	200520636	200520738	15.6576	6.40784	-
chr1	200520771	200520782	2.08113	3.0738	-
chr1	200520802	200520829	2.90922	3.47381	-
chr1	200520903	200521032	7.24732	4.46364	-
chr1	200521053	200521101	4.74788	4.0738	-
chr1	200521323	200521376	3.30786	2.9218	-
chr1	200521502	200521600	2.69962	3.44728	-
chr1	200827572	200827696	3.74376	3.75762	+
chr1	200828371	200828531	10.7472	4.2599	+
chr1	200828564	200828664	5.59963	3.83489	+
chr1	200828749	200828842	10.8973	5.10642	+
chr1	200829656	200829825	5.62048	4.13012	+
chr1	201103929	201104004	7.104	4.52383	-
chr1	201104096	201104184	8.59285	3.96408	-
chr1	201104262	201104495	12.5234	5.43014	-
chr1	201104506	201104598	7.16885	2.94311	-
chr1	201104632	201104642	2.51343	3.32699	-
chr1	201252747	201252817	4.06177	2.87174	+
chr1	201291108	201291175	3.51783	2.5592	+
chr1	201294880	201294894	2.1064	3.12536	+
chr1	201297954	201297997	3.01232	2.59354	+
chr1	201299344	201299730	92.5261	7.31488	+
chr1	201301287	201301369	15.6576	6.26622	+
chr1	201301874	201302112	15.6576	6.49619	+
chr1	201350411	201350552	15.0986	3.95356	-
chr1	201350821	201350926	5.1046	3.43163	-
chr1	201366648	201366715	3.94315	3.84358	-
chr1	201434648	201434768	10.0546	4.98075	-
chr1	201752659	201752746	2.78709	2.31249	+
chr1	201752771	201752949	3.58519	2.68974	+
chr1	201845756	201845854	15.6576	5.89968	+
chr1	201938941	201938958	5.29659	4.18614	+
chr1	201939012	201939062	11.3927	4.30428	+
chr1	201939082	201939340	14.4887	6.55584	+
chr1	201939404	201939485	15.6576	6.31355	+
chr1	202102589	202102742	2.9479	3.16278	-
chr1	202696941	202697055	2.55225	2.6233	-
chr1	202697187	202697314	2.35861	3.14793	-
chr1	202697585	202697658	2.80505	3.44758	-
chr1	202931174	202931250	3.11538	3.53845	-
chr1	202931281	202931383	4.26107	3.88481	-
chr1	202992722	202992832	11.4128	4.24228	+
chr1	202992844	202992921	3.13006	3.55832	+
chr1	202993222	202993346	9.18905	4.87303	+
chr1	202993855	202993950	2.40157	3.26915	+
chr1	203045248	203045414	13.8778	5.67554	+
chr1	203277223	203277383	15.6576	4.91439	+
chr1	203277538	203277583	3.34866	2.89206	+
chr1	203277708	203277820	7.90464	4.47891	+
chr1	203278239	203278332	2.92545	2.56662	+
chr1	203278407	203278460	6.2526	3.58293	+
chr1	203707948	203708109	4.63509	3.23559	+
chr1	203709405	203709475	2.23193	2.75475	+
chr1	203709522	203709573	2.48572	3.27544	+
chr1	203709784	203709878	8.68682	4.80155	+
chr1	203710097	203710213	5.63598	3.72015	+
chr1	203710371	203710422	4.15877	3.12536	+
chr1	203711295	203711371	4.35525	2.1859	+
chr1	203711454	203711662	20.1726	4.07742	+
chr1	203711995	203712032	5.51442	3.4243	+
chr1	203712591	203712621	15.6576	4.42394	+
chr1	203712689	203712696	14.8502	5.51767	+
chr1	203712764	203713185	19.0332	6.61317	+
chr1	204118589	204118779	2.60064	3.33191	-
chr1	204230987	204231074	2.40517	3.24006	-
chr1	204244764	204244843	2.00146	2.97381	-
chr1	204374870	204375018	13.467	3.84871	-
chr1	204461608	204461735	2.7169	3.35506	-
chr1	204461761	204461905	2.90625	3.49912	-
chr1	204520722	204520884	13.5443	4.49963	+
chr1	204521829	204521944	15.6576	5.2267	+
chr1	204522523	204522601	15.6576	5.88669	+
chr1	204522628	204522716	23.6255	4.53511	+
chr1	204523054	204523133	9.92378	3.36071	+
chr1	204523148	204523222	15.6576	5.17674	+
chr1	204523227	204523370	15.4436	4.73064	+
chr1	204523423	204523460	7.82362	3.84782	+
chr1	204523506	204523629	15.6576	6.56132	+
chr1	204523680	204523730	13.4021	5.4218	+
chr1	204523822	204523847	6.48932	3.16691	+
chr1	205487160	205487231	5.82678	4.31472	+
chr1	205487287	205487394	7.62342	4.64754	+
chr1	205583477	205583586	2.99968	1.77078	-
chr1	205583613	205583863	3.09135	2.039	-
chr1	205585566	205585672	2.69953	3.34358	-
chr1	205682427	205682719	15.6576	8.14978	-
chr1	205682724	205682733	15.6576	6.55277	-
chr1	205682762	205682934	22.5808	6.63845	-
chr1	205683012	205683183	15.6576	6.92759	-
chr1	205683246	205683318	15.6576	8.29021	-
chr1	205683346	205683390	31.6788	5.00582	-
chr1	205683411	205683554	105.47	6.74055	-
chr1	205684640	205684732	10.1181	3.45419	-
chr1	205684753	205684907	15.6576	6.51614	-
chr1	205685013	205685089	23.8629	4.55854	-
chr1	205685362	205685392	3.7529	2.02944	-
chr1	205686662	205686768	4.74847	3.10334	-
chr1	205687114	205687201	14.8752	4.40767	-
chr1	205687246	205687316	10.1607	3.36962	-
chr1	205687341	205687394	2.52193	2.22033	-
chr1	206628390	206628627	5.88637	4.16299	+
chr1	206761953	206762025	5.91944	4.34551	+
chr1	206762096	206762132	3.11538	3.53845	+
chr1	206762162	206762277	15.6576	7.03217	+
chr1	206762507	206762543	3.30504	3.60986	+
chr1	206767434	206767600	2.10171	2.28652	-
chr1	206824948	206825052	4.28221	3.87775	+
chr1	206825655	206825800	3.70748	3.26629	+
chr1	206828345	206828501	5.64891	3.42726	+
chr1	206877648	206877770	2.01519	2.94758	+
chr1	206878541	206878632	15.6576	4.90561	+
chr1	206878713	206878843	9.74931	4.96531	+
chr1	206906154	206906275	2.76886	2.69251	+
chr1	207200737	207200931	8.85994	3.37121	-
chr1	207201069	207201230	15.6576	4.86792	-
chr1	207246206	207246308	15.6576	5.50368	+
chr1	207246363	207246398	4.63194	3.21974	+
chr1	207246442	207246476	5.29752	4.19765	+
chr1	207246498	207246632	12.5721	4.73113	+
chr1	207247020	207247060	6.01731	4.35759	+
chr1	207247142	207247243	15.6576	5.20382	+
chr1	207247370	207247517	15.6576	5.90079	+
chr1	207248283	207248363	6.00838	4.37749	+
chr1	207248941	207249008	5.70872	4.29814	+
chr1	207249263	207249466	10.8626	3.49846	+
chr1	207250126	207250272	15.6576	6.19656	+
chr1	207250435	207250464	4.54898	3.9998	+
chr1	207250899	207251015	8.35971	4.70118	+
chr1	207251100	207251157	8.9992	4.79281	+
chr1	207253856	207253928	3.32322	3.60407	+
chr1	207253981	207254044	2.22308	2.90635	+
chr1	207522977	207523063	2.5089	3.27906	+
chr1	207940738	207940821	3.42252	3.68374	+
chr1	207959032	207959244	10.463	4.70362	+
chr1	207962315	207962595	6.58904	3.61611	+
chr1	207967069	207967220	12.4731	4.40339	+
chr1	208200185	208200335	14.1852	4.80248	-
chr1	208251706	208251954	8.80075	3.80124	-
chr1	209702083	209702175	3.53429	3.67486	-
chr1	209788286	209788418	6.02532	2.37565	-
chr1	209791650	209791712	2.3245	2.16541	-
chr1	209800039	209800208	13.4941	3.66612	-
[truncated: 21,787 more rows]
